# Supplementary material
Source: PubMed Central journal article supplement (PMC6643619)
Supplement: ao6b00481_si_001.pdf [file ao6b00481_si_001.pdf]

## Supporting Information

### Hydroxyl ketone-based histone deacetylase (HDAC) inhibitors to gain insights into class I HDAC selectivity versus HDAC6

Mohamed D. M. Traoré,<sup>1,2</sup> Vincent Zwick,<sup>3</sup> Claudia A. Simões-Pires,<sup>3</sup> Alessandra Nurisso,<sup>3,4</sup> Mark Issa,<sup>3</sup> Muriel Cuendet,<sup>3</sup> Marjorie Maynadier,<sup>5</sup> Sharon Wein,<sup>5</sup> Henri Vial,<sup>5</sup> Helene Jamet,<sup>2</sup> Yung-Sing Wong<sup>1\*</sup>

1. Univ. Grenoble Alpes, Département de Pharmacochimie Moléculaire, CNRS UMR 5063, ICMG FR 2607, 470 rue de la chimie, 38041 Grenoble cedex 9, France

2. Univ. Grenoble Alpes, Département de Chimie Moléculaire, CNRS UMR 5250, ICMG FR 2607, 301 rue de la chimie, 38041 Grenoble cedex 9, France

3. School of Pharmaceutical Sciences, University of Geneva, University of Lausanne, rue Michel Servet 1, 1211 Geneva, Switzerland

4. Laboratoire Dynamique des Interactions Membranaires Normales et Pathologiques, UMR5235, CNRS, University of Montpellier, Place Eugène Bataillon, 34095 Montpellier, France

5. Département de Biochimie, Université de Montréal, H3C 3J7 Montréal, Québec, Canada

#### Table of Contents

|                                                                                                                   |     |
|-------------------------------------------------------------------------------------------------------------------|-----|
| 1. Supplementary Figures S1, S2, S3, S4, S5, S6 and S7 and Table S1.....                                          | S2  |
| 2. Dose-response plots.....                                                                                       | S7  |
| 3. Coordinates of HDAC6 model.....                                                                                | S10 |
| 4. <sup>1</sup> H (400 MHz) and <sup>13</sup> C (100 MHz) NMR spectra for new products in CDCl <sub>3</sub> ..... | S46 |

1. Supplementary Figure S1, S2, S3, S4, S5 , S6, S7, S8 and Table S1

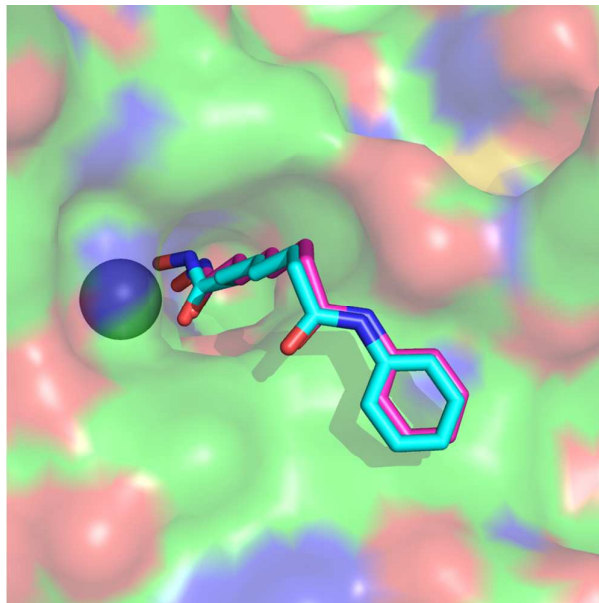

**Figure S1:** Superposition of the X-ray and docked structure of SAHA in complex with HDAC2. We used the three-dimensional (3D) structure of HDAC2 (PDB: 4LXZ) to validate our docking protocol. The choice of HDAC2 is justified by the great similarity between HDAC1 and HDAC2. They share 85% sequence identity and 93% sequence similarity, which confer very similar shapes for all the protein regions

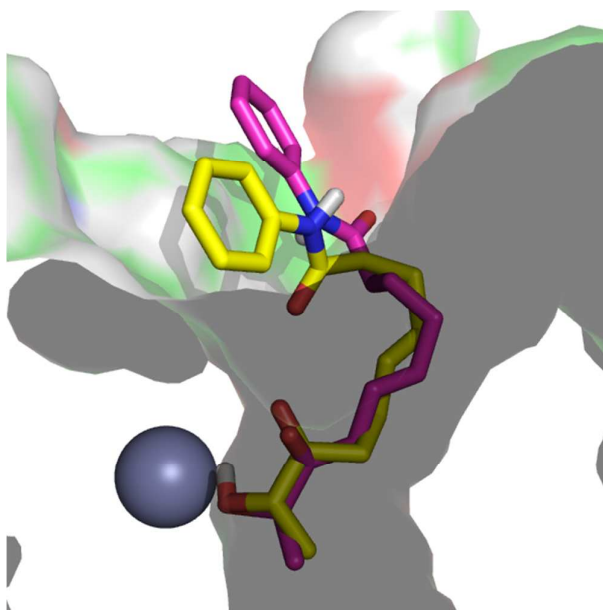

**Figure S2:** Comparison of the best-ranked docked positions obtained for 11b which a protonated (respectively deprotonated) ZBG group in HDAC6

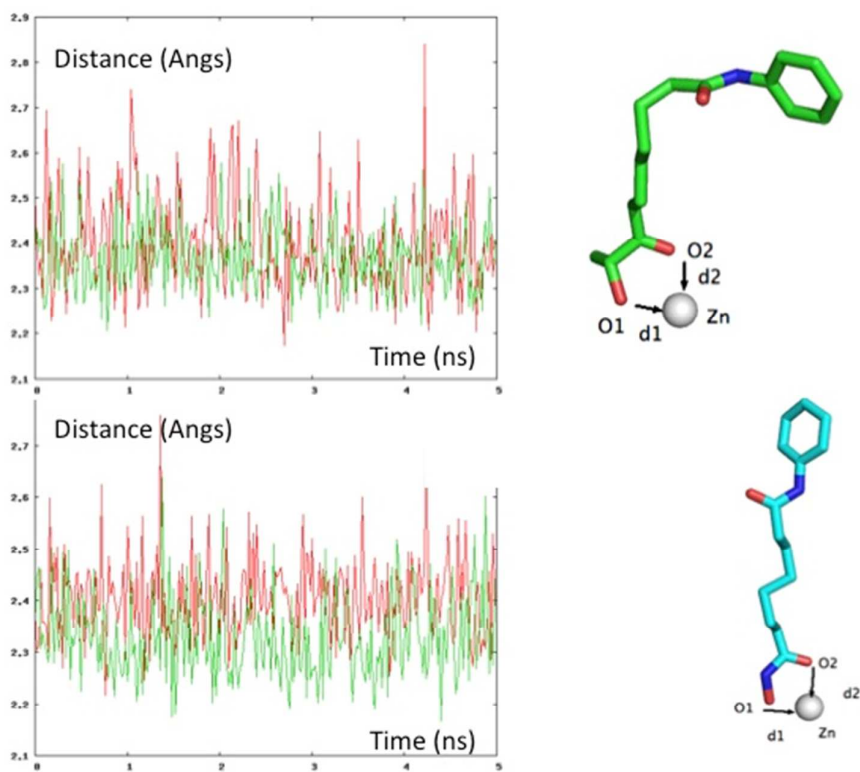

**Figure S3:** Distance (d1 in red, d2 in blue) vs Time plots for **11b** (at the top) and for SAHA (at the bottom) in HDAC1

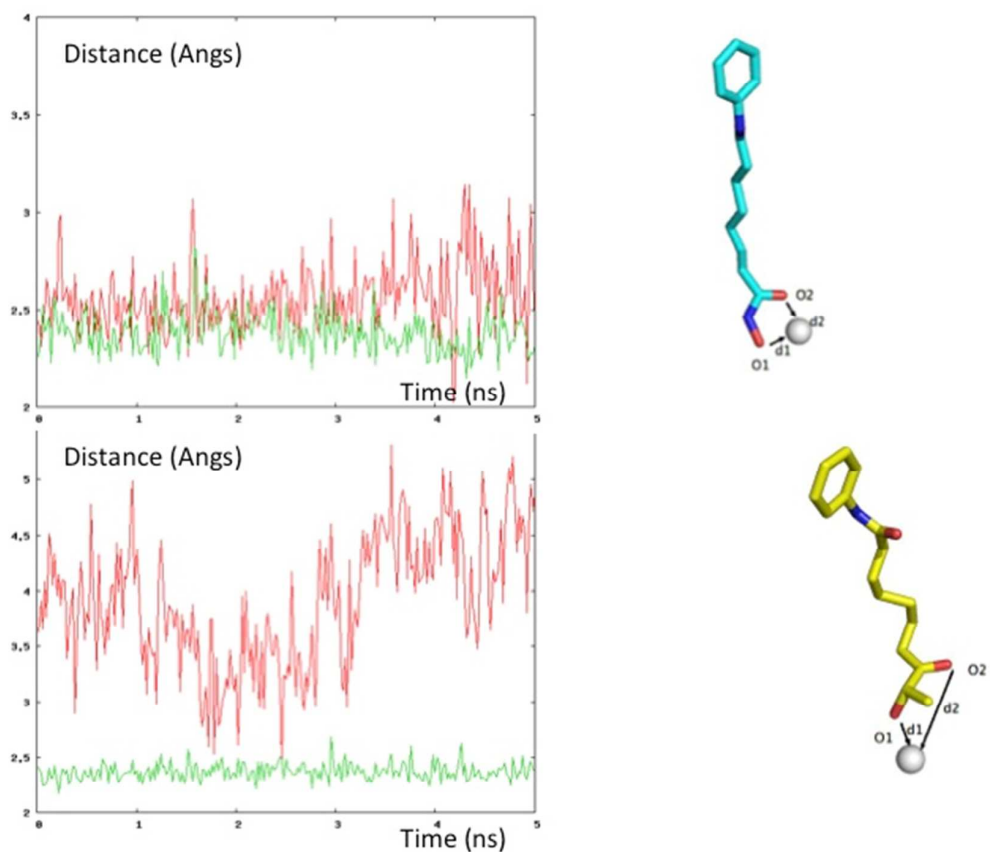

**Figure S4:** Distance (d1 in red, d2 in blue) vs Time plots for **11b** (at the bottom) and for SAHA (at the top) in HDAC6

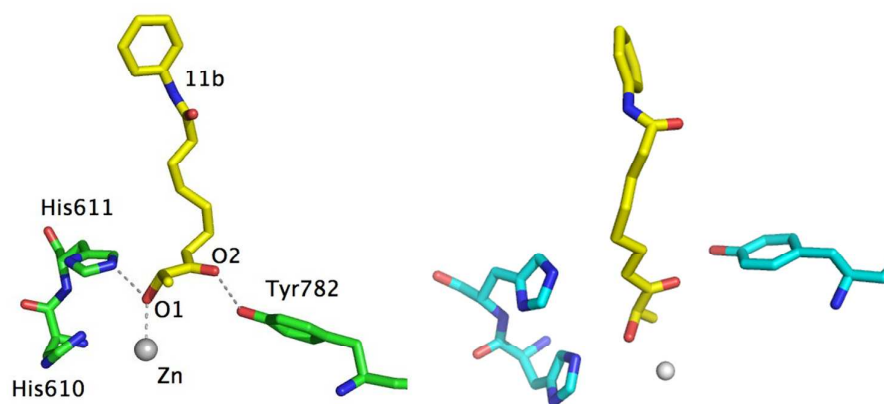

**Figure S5:** Main interactions of **11b** (yellow stick atoms) with the residues characterizing the zinc binding domain of HDAC6 after 20 ns of simulation (at the left with the model residues in green, at the right with X-ray structure (PDB: 5EDU) residues in blue)

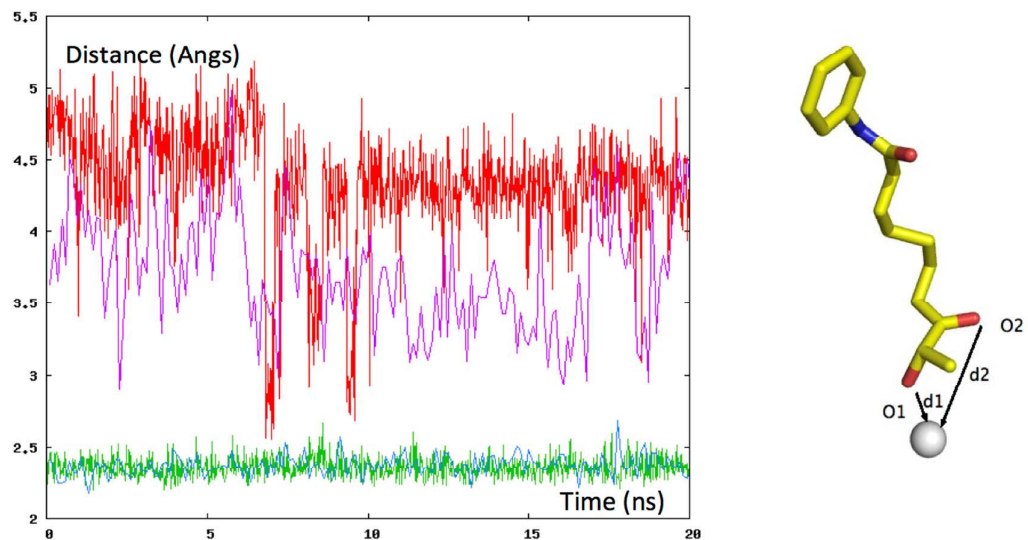

**Figure S6** : Distance (d1 in green , d2 in red for the HDAC6 X-ray; d1 in blue , d2 in magenta for our HDAC6 model) vs Time plots

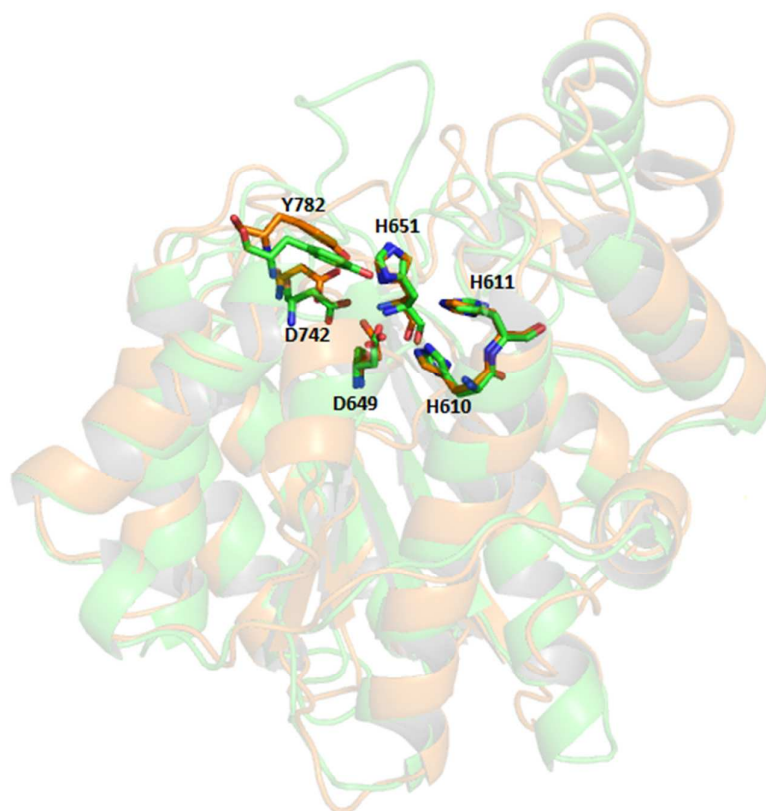

**Figure S7**: Superposition of the backbone of HDAC6 X-Ray structure (PDB: 5EDU, green) with the HDAC6 model (orange). A rmsd of 3,2 Å was obtained but positions of the residues involved in the catalytic mechanism (in sticks) are well conserved.

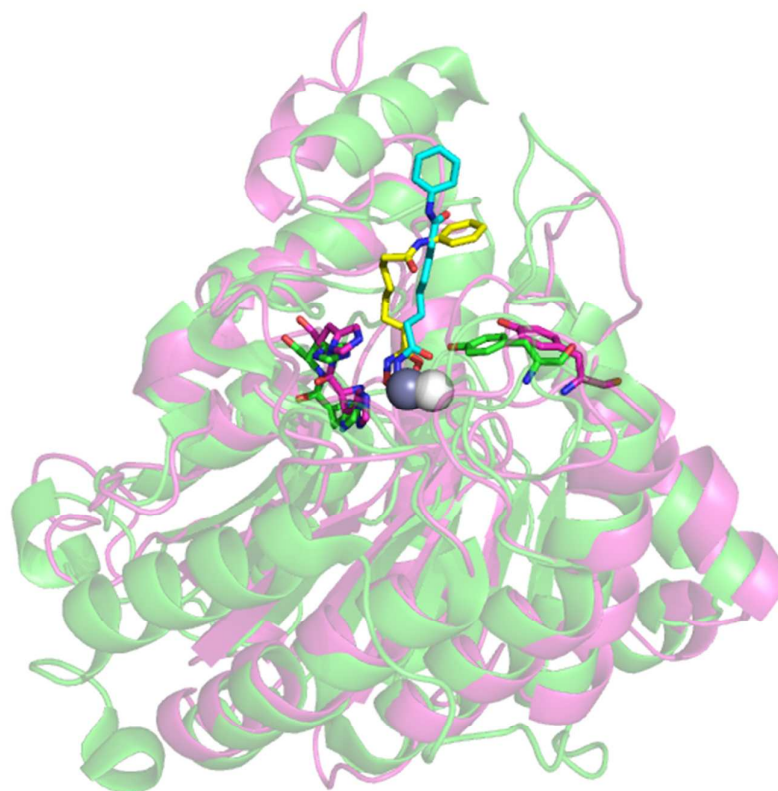

**Figure S8:** Superposition of the backbone of the complex between SAHA and the Danio Renio HDAC6 X-Ray structure (PDB : 5EEI, green) with the complex obtained after molecular dynamics between SAHA and the HDAC6 model (orange). A rmsd of 3.3 Å was found but same binding mode between SAHA and the zinc atom was obtained.

| Ramachandran (backbone atoms) plot                                                                                                    | MOE Protein Geometry module                                   | Errat                           | Verify3D                                                           | QMEAN score         |
|---------------------------------------------------------------------------------------------------------------------------------------|---------------------------------------------------------------|---------------------------------|--------------------------------------------------------------------|---------------------|
| Allowed : 73+23.4% (96.4%)<br>Generously allowed : 2.6%<br>Outliers : 1.1%<br>(Leu117;Cys11; Ala 212, not part of the catalytic area) | No atom clashes<br>No BB bond outliers<br>No rotamer outliers | Overall quality factor*: 94.194 | 95.28% of the residues had an averaged 3D-1D score $\geq 0.2^{**}$ | 0.64 <sup>***</sup> |

Table S1: Quality of HDAC6 model (\*Expressed as the percentage of the protein for which the calculated error value falls below the 95% rejection limit. Good high resolution structures generally produce values around 95% or higher. For lower resolutions (2.5 to 3Å) the average overall quality factor is around 91%; \*\*At least 80% of the amino acids have scored  $\geq 0.2$  in the 3D/1D profile); \*\*\* Global score of the whole model reflecting the predicted model reliability ranging from 0 to 1.

## 2. Dose-response plots

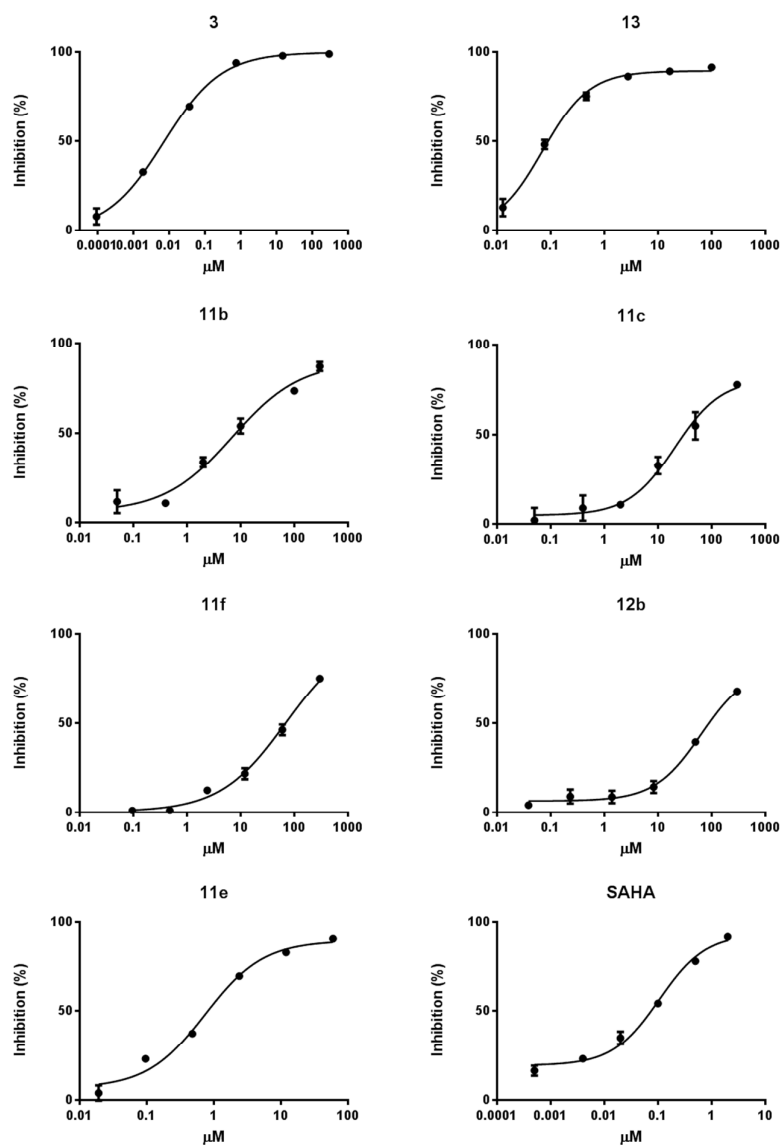

**Figure S9:** IC<sub>50</sub> curves obtained for active compounds with HeLa nuclear extract as enzymatic source.

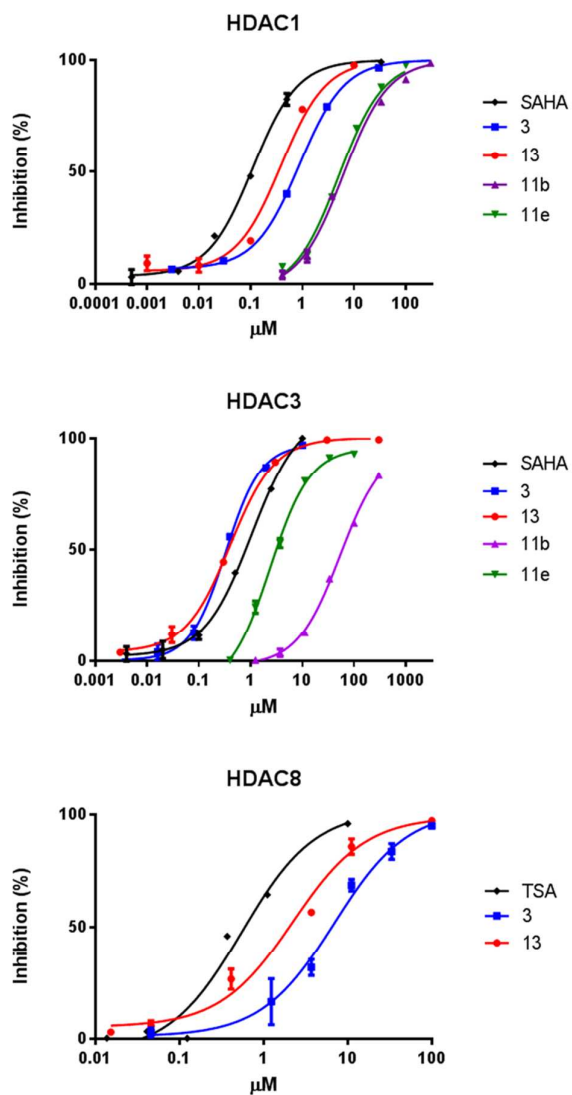

Figure S10: IC<sub>50</sub> curves obtained for active compounds on HDAC1, HDAC3, and HDAC8.

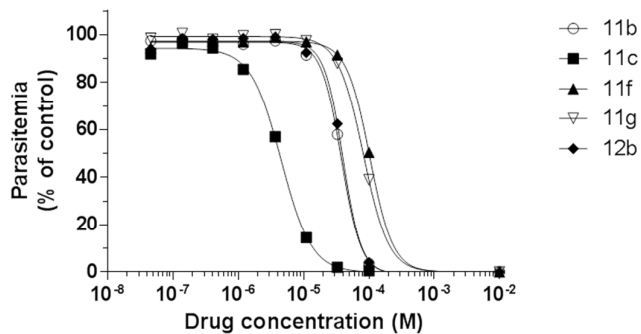

Figure S11: GI<sub>50</sub> curves obtained for active compounds against *P. falciparum* 3D7.



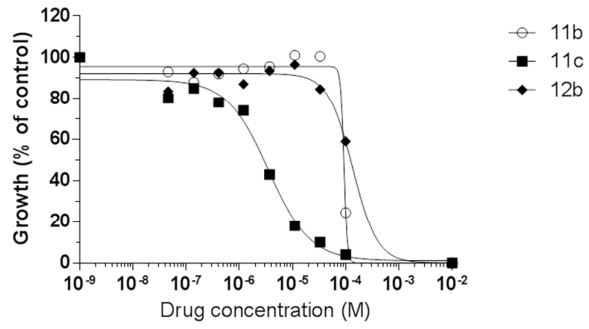

**Figure S12:** GI<sub>50</sub> curves obtained for active compounds against lymphoblast (Jurkat).

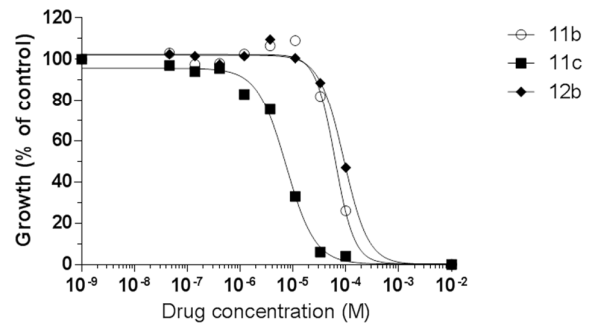

**Figure S13:** GI<sub>50</sub> curves obtained for active compounds against erythroblast (K562).

### 3. Coordinates of HDAC6 model

|      |    |     |     |   |   |        |        |        |      |       |   |
|------|----|-----|-----|---|---|--------|--------|--------|------|-------|---|
| ATOM | 1  | N   | AMN | A | 0 | 39.109 | 9.564  | 9.553  | 1.00 | 0.10  | N |
| ATOM | 2  | CA  | LEU | A | 1 | 39.398 | 9.481  | 8.114  | 1.00 | 0.01  | C |
| ATOM | 3  | C   | LEU | A | 1 | 40.767 | 8.835  | 7.927  | 1.00 | 0.61  | C |
| ATOM | 4  | O   | LEU | A | 1 | 41.763 | 9.411  | 8.362  | 1.00 | -0.57 | C |
| ATOM | 5  | CB  | LEU | A | 1 | 39.292 | 10.887 | 7.487  | 1.00 | -0.02 | O |
| ATOM | 6  | CG  | LEU | A | 1 | 39.634 | 10.976 | 5.986  | 1.00 | 0.34  | C |
| ATOM | 7  | CD1 | LEU | A | 1 | 38.769 | 10.056 | 5.116  | 1.00 | -0.41 | C |
| ATOM | 8  | CD2 | LEU | A | 1 | 39.448 | 12.418 | 5.508  | 1.00 | -0.41 | C |
| ATOM | 9  | N   | VAL | A | 2 | 40.838 | 7.640  | 7.326  | 1.00 | -0.42 | N |
| ATOM | 10 | CA  | VAL | A | 2 | 42.154 | 7.019  | 7.048  | 1.00 | -0.09 | C |
| ATOM | 11 | C   | VAL | A | 2 | 42.693 | 7.555  | 5.708  | 1.00 | 0.60  | C |
| ATOM | 12 | O   | VAL | A | 2 | 42.062 | 7.390  | 4.652  | 1.00 | -0.57 | O |
| ATOM | 13 | CB  | VAL | A | 2 | 42.161 | 5.476  | 7.139  | 1.00 | 0.30  | C |
| ATOM | 14 | CG1 | VAL | A | 2 | 43.596 | 4.922  | 7.130  | 1.00 | -0.32 | C |
| ATOM | 15 | CG2 | VAL | A | 2 | 41.548 | 4.979  | 8.458  | 1.00 | -0.32 | C |
| ATOM | 16 | N   | TYR | A | 3 | 43.830 | 8.258  | 5.763  | 1.00 | -0.42 | N |
| ATOM | 17 | CA  | TYR | A | 3 | 44.338 | 9.080  | 4.663  | 1.00 | -0.00 | C |
| ATOM | 18 | C   | TYR | A | 3 | 45.865 | 9.271  | 4.752  | 1.00 | 0.60  | C |
| ATOM | 19 | O   | TYR | A | 3 | 46.425 | 9.559  | 5.810  | 1.00 | -0.57 | O |
| ATOM | 20 | CB  | TYR | A | 3 | 43.571 | 10.420 | 4.675  | 1.00 | -0.02 | C |
| ATOM | 21 | CG  | TYR | A | 3 | 43.837 | 11.447 | 3.579  | 1.00 | -0.00 | C |
| ATOM | 22 | CD1 | TYR | A | 3 | 44.276 | 11.080 | 2.289  | 1.00 | -0.19 | C |
| ATOM | 23 | CD2 | TYR | A | 3 | 43.581 | 12.808 | 3.852  | 1.00 | -0.19 | C |
| ATOM | 24 | CE1 | TYR | A | 3 | 44.494 | 12.064 | 1.307  | 1.00 | -0.23 | C |
| ATOM | 25 | CE2 | TYR | A | 3 | 43.786 | 13.787 | 2.863  | 1.00 | -0.23 | C |
| ATOM | 26 | CZ  | TYR | A | 3 | 44.255 | 13.419 | 1.592  | 1.00 | 0.32  | C |
| ATOM | 27 | OH  | TYR | A | 3 | 44.480 | 14.363 | 0.634  | 1.00 | -0.56 | O |
| ATOM | 28 | N   | ASP | A | 4 | 46.500 | 9.085  | 3.588  | 1.00 | -0.52 | N |
| ATOM | 29 | CA  | ASP | A | 4 | 47.913 | 9.257  | 3.236  | 1.00 | 0.04  | C |
| ATOM | 30 | C   | ASP | A | 4 | 47.984 | 9.390  | 1.697  | 1.00 | 0.54  | C |
| ATOM | 31 | O   | ASP | A | 4 | 47.015 | 9.077  | 0.997  | 1.00 | -0.58 | O |
| ATOM | 32 | CB  | ASP | A | 4 | 48.728 | 8.059  | 3.795  | 1.00 | -0.03 | C |
| ATOM | 33 | CG  | ASP | A | 4 | 49.807 | 7.472  | 2.864  | 1.00 | 0.80  | C |
| ATOM | 34 | OD1 | ASP | A | 4 | 49.616 | 6.305  | 2.437  | 1.00 | -0.80 | O |
| ATOM | 35 | OD2 | ASP | A | 4 | 50.791 | 8.180  | 2.533  | 1.00 | -0.80 | O |
| ATOM | 36 | N   | GLN | A | 5 | 49.133 | 9.827  | 1.175  | 1.00 | -0.42 | N |
| ATOM | 37 | CA  | GLN | A | 5 | 49.421 | 9.910  | -0.262 | 1.00 | -0.00 | C |
| ATOM | 38 | C   | GLN | A | 5 | 49.709 | 8.538  | -0.903 | 1.00 | 0.60  | C |
| ATOM | 39 | O   | GLN | A | 5 | 49.237 | 8.263  | -2.008 | 1.00 | -0.57 | O |
| ATOM | 40 | CB  | GLN | A | 5 | 50.616 | 10.857 | -0.475 | 1.00 | -0.00 | C |
| ATOM | 41 | CG  | GLN | A | 5 | 50.883 | 11.187 | -1.949 | 1.00 | -0.06 | C |
| ATOM | 42 | CD  | GLN | A | 5 | 49.667 | 11.808 | -2.606 | 1.00 | 0.70  | C |
| ATOM | 43 | NE2 | GLN | A | 5 | 49.360 | 13.056 | -2.284 | 1.00 | -0.94 | N |
| ATOM | 44 | OE1 | GLN | A | 5 | 48.981 | 11.173 | -3.391 | 1.00 | -0.61 | O |
| ATOM | 45 | N   | ASN | A | 6 | 50.446 | 7.641  | -0.231 | 1.00 | -0.42 | N |
| ATOM | 46 | CA  | ASN | A | 6 | 50.625 | 6.265  | -0.725 | 1.00 | 0.01  | C |
| ATOM | 47 | C   | ASN | A | 6 | 49.244 | 5.575  | -0.879 | 1.00 | 0.60  | C |
| ATOM | 48 | O   | ASN | A | 6 | 48.958 | 4.938  | -1.891 | 1.00 | -0.57 | O |
| ATOM | 49 | CB  | ASN | A | 6 | 51.667 | 5.545  | 0.160  | 1.00 | -0.20 | C |
| ATOM | 50 | CG  | ASN | A | 6 | 51.436 | 4.050  | 0.360  | 1.00 | 0.71  | C |
| ATOM | 51 | ND2 | ASN | A | 6 | 50.570 | 3.704  | 1.304  | 1.00 | -0.92 | N |
| ATOM | 52 | OD1 | ASN | A | 6 | 52.057 | 3.204  | -0.274 | 1.00 | -0.59 | O |
| ATOM | 53 | N   | MET | A | 7 | 48.326 | 5.840  | 0.052  | 1.00 | -0.42 | N |
| ATOM | 54 | CA  | MET | A | 7 | 46.898 | 5.512  | 0.011  | 1.00 | -0.02 | C |
| ATOM | 55 | C   | MET | A | 7 | 46.070 | 6.142  | -1.149 | 1.00 | 0.60  | C |
| ATOM | 56 | O   | MET | A | 7 | 44.845 | 5.966  | -1.165 | 1.00 | -0.57 | O |
| ATOM | 57 | CB  | MET | A | 7 | 46.305 | 5.921  | 1.376  | 1.00 | 0.03  | C |
| ATOM | 58 | CG  | MET | A | 7 | 45.456 | 4.816  | 2.006  | 1.00 | 0.00  | C |
| ATOM | 59 | SD  | MET | A | 7 | 44.531 | 5.395  | 3.454  | 1.00 | -0.27 | S |
| ATOM | 60 | CE  | MET | A | 7 | 43.744 | 3.834  | 3.908  | 1.00 | -0.05 | C |
| ATOM | 61 | N   | MET | A | 8 | 46.690 | 6.888  | -2.075 | 1.00 | -0.42 | N |
| ATOM | 62 | CA  | MET | A | 8 | 46.062 | 7.685  | -3.142 | 1.00 | -0.02 | C |
| ATOM | 63 | C   | MET | A | 8 | 46.808 | 7.614  | -4.494 | 1.00 | 0.60  | C |
| ATOM | 64 | O   | MET | A | 8 | 46.157 | 7.558  | -5.535 | 1.00 | -0.57 | O |
| ATOM | 65 | CB  | MET | A | 8 | 45.952 | 9.132  | -2.638 | 1.00 | 0.03  | C |
| ATOM | 66 | CG  | MET | A | 8 | 45.323 | 10.084 | -3.659 | 1.00 | 0.00  | C |
| ATOM | 67 | SD  | MET | A | 8 | 44.621 | 11.579 | -2.921 | 1.00 | -0.27 | S |
| ATOM | 68 | CE  | MET | A | 8 | 46.109 | 12.442 | -2.365 | 1.00 | -0.05 | C |
| ATOM | 69 | N   | ASN | A | 9 | 48.145 | 7.516  | -4.486 | 1.00 | -0.42 | N |
| ATOM | 70 | CA  | ASN | A | 9 | 48.944 | 7.134  | -5.655 | 1.00 | 0.01  | C |
| ATOM | 71 | C   | ASN | A | 9 | 48.531 | 5.765  | -6.249 | 1.00 | 0.60  | C |
| ATOM | 72 | O   | ASN | A | 9 | 48.670 | 5.535  | -7.449 | 1.00 | -0.57 | O |
| ATOM | 73 | CB  | ASN | A | 9 | 50.421 | 7.131  | -5.215 | 1.00 | -0.20 | C |
| ATOM | 74 | CG  | ASN | A | 9 | 51.377 | 6.848  | -6.369 | 1.00 | 0.71  | C |
| ATOM | 75 | ND2 | ASN | A | 9 | 51.712 | 5.591  | -6.618 | 1.00 | -0.92 | N |

|      |     |     |     |   |    |        |        |         |      |       |   |
|------|-----|-----|-----|---|----|--------|--------|---------|------|-------|---|
| ATOM | 76  | OD1 | ASN | A | 9  | 51.849 | 7.753  | -7.040  | 1.00 | -0.59 | O |
| ATOM | 77  | N   | HIS | A | 10 | 48.046 | 4.851  | -5.402  | 1.00 | -0.42 | N |
| ATOM | 78  | CA  | HIS | A | 10 | 47.810 | 3.452  | -5.766  | 1.00 | -0.06 | C |
| ATOM | 79  | C   | HIS | A | 10 | 46.339 | 3.228  | -6.200  | 1.00 | 0.60  | O |
| ATOM | 80  | O   | HIS | A | 10 | 45.807 | 3.907  | -7.084  | 1.00 | -0.57 | O |
| ATOM | 81  | CB  | HIS | A | 10 | 48.251 | 2.598  | -4.559  | 1.00 | -0.01 | C |
| ATOM | 82  | CG  | HIS | A | 10 | 49.697 | 2.743  | -4.137  | 1.00 | 0.19  | C |
| ATOM | 83  | CD2 | HIS | A | 10 | 50.206 | 2.200  | -2.994  | 1.00 | -0.22 | C |
| ATOM | 84  | ND1 | HIS | A | 10 | 50.707 | 3.469  | -4.789  | 1.00 | -0.54 | N |
| ATOM | 85  | CE1 | HIS | A | 10 | 51.790 | 3.356  | -4.004  | 1.00 | 0.16  | C |
| ATOM | 86  | NE2 | HIS | A | 10 | 51.511 | 2.619  | -2.917  | 1.00 | -0.28 | N |
| ATOM | 87  | N   | CYS | A | 11 | 45.649 | 2.274  | -5.564  | 1.00 | -0.42 | N |
| ATOM | 88  | CA  | CYS | A | 11 | 44.206 | 2.353  | -5.338  | 1.00 | 0.02  | C |
| ATOM | 89  | C   | CYS | A | 11 | 42.894 | 1.509  | -5.264  | 1.00 | 0.60  | O |
| ATOM | 90  | O   | CYS | A | 11 | 42.175 | 1.442  | -6.272  | 1.00 | -0.57 | O |
| ATOM | 91  | CB  | CYS | A | 11 | 43.568 | 3.713  | -4.938  | 1.00 | -0.12 | C |
| ATOM | 92  | SG  | CYS | A | 11 | 43.333 | 3.878  | -3.148  | 1.00 | -0.31 | S |
| ATOM | 93  | N   | ASN | A | 12 | 42.472 | 0.984  | -4.099  | 1.00 | -0.42 | N |
| ATOM | 94  | CA  | ASN | A | 12 | 41.108 | 0.460  | -3.940  | 1.00 | 0.01  | C |
| ATOM | 95  | C   | ASN | A | 12 | 39.988 | 1.549  | -3.935  | 1.00 | 0.60  | C |
| ATOM | 96  | O   | ASN | A | 12 | 38.819 | 1.265  | -3.714  | 1.00 | -0.57 | O |
| ATOM | 97  | CB  | ASN | A | 12 | 41.055 | -0.500 | -2.751  | 1.00 | -0.20 | C |
| ATOM | 98  | CG  | ASN | A | 12 | 41.441 | 0.159  | -1.450  | 1.00 | 0.71  | C |
| ATOM | 99  | ND2 | ASN | A | 12 | 40.577 | 0.087  | -0.467  | 1.00 | -0.92 | N |
| ATOM | 100 | OD1 | ASN | A | 12 | 42.503 | 0.752  | -1.316  | 1.00 | -0.59 | O |
| ATOM | 101 | N   | LEU | A | 13 | 40.320 | 2.821  | -4.219  | 1.00 | -0.42 | N |
| ATOM | 102 | CA  | LEU | A | 13 | 39.367 | 3.854  | -4.687  | 1.00 | -0.05 | C |
| ATOM | 103 | C   | LEU | A | 13 | 39.663 | 4.313  | -6.133  | 1.00 | 0.60  | C |
| ATOM | 104 | O   | LEU | A | 13 | 39.231 | 5.361  | -6.602  | 1.00 | -0.57 | O |
| ATOM | 105 | CB  | LEU | A | 13 | 39.192 | 4.946  | -3.625  | 1.00 | -0.11 | C |
| ATOM | 106 | CG  | LEU | A | 13 | 38.242 | 6.132  | -3.910  | 1.00 | 0.35  | C |
| ATOM | 107 | CD1 | LEU | A | 13 | 36.834 | 5.686  | -4.289  | 1.00 | -0.41 | C |
| ATOM | 108 | CD2 | LEU | A | 13 | 38.163 | 7.014  | -2.669  | 1.00 | -0.41 | C |
| ATOM | 109 | N   | TRP | A | 14 | 40.338 | 3.435  | -6.867  | 1.00 | -0.42 | N |
| ATOM | 110 | CA  | TRP | A | 14 | 40.288 | 3.251  | -8.313  | 1.00 | -0.03 | C |
| ATOM | 111 | C   | TRP | A | 14 | 41.293 | 4.114  | -9.098  | 1.00 | 0.60  | C |
| ATOM | 112 | O   | TRP | A | 14 | 41.412 | 3.876  | -10.297 | 1.00 | -0.57 | O |
| ATOM | 113 | CB  | TRP | A | 14 | 38.852 | 3.309  | -8.911  | 1.00 | -0.01 | C |
| ATOM | 114 | CG  | TRP | A | 14 | 37.696 | 2.529  | -8.308  | 1.00 | -0.14 | C |
| ATOM | 115 | CD1 | TRP | A | 14 | 37.041 | 2.831  | -7.165  | 1.00 | -0.16 | C |
| ATOM | 116 | CD2 | TRP | A | 14 | 36.894 | 1.447  | -8.892  | 1.00 | 0.12  | C |
| ATOM | 117 | CE2 | TRP | A | 14 | 35.811 | 1.135  | -8.006  | 1.00 | 0.14  | C |
| ATOM | 118 | CE3 | TRP | A | 14 | 36.934 | 0.728  | -10.106 | 1.00 | -0.24 | C |
| ATOM | 119 | NE1 | TRP | A | 14 | 35.987 | 1.978  | -6.938  | 1.00 | -0.34 | N |
| ATOM | 120 | CZ2 | TRP | A | 14 | 34.827 | 0.182  | -8.306  | 1.00 | -0.26 | C |
| ATOM | 121 | CZ3 | TRP | A | 14 | 35.952 | -0.230 | -10.420 | 1.00 | -0.20 | C |
| ATOM | 122 | CH2 | TRP | A | 14 | 34.895 | -0.493 | -9.534  | 1.00 | -0.11 | C |
| ATOM | 123 | N   | ASP | A | 15 | 42.045 | 5.052  | -8.479  | 1.00 | -0.52 | N |
| ATOM | 124 | CA  | ASP | A | 15 | 43.008 | 5.900  | -9.216  | 1.00 | 0.04  | C |
| ATOM | 125 | C   | ASP | A | 15 | 43.925 | 5.100  | -10.147 | 1.00 | 0.54  | C |
| ATOM | 126 | O   | ASP | A | 15 | 44.096 | 5.503  | -11.295 | 1.00 | -0.58 | O |
| ATOM | 127 | CB  | ASP | A | 15 | 43.855 | 6.809  | -8.301  | 1.00 | -0.03 | C |
| ATOM | 128 | CG  | ASP | A | 15 | 43.446 | 8.295  | -8.372  | 1.00 | 0.80  | C |
| ATOM | 129 | OD1 | ASP | A | 15 | 44.289 | 9.103  | -8.818  | 1.00 | -0.80 | O |
| ATOM | 130 | OD2 | ASP | A | 15 | 42.292 | 8.634  | -7.996  | 1.00 | -0.80 | O |
| ATOM | 131 | N   | SER | A | 16 | 44.482 | 3.970  | -9.679  | 1.00 | -0.42 | N |
| ATOM | 132 | CA  | SER | A | 16 | 45.247 | 3.059  | -10.547 | 1.00 | -0.02 | C |
| ATOM | 133 | C   | SER | A | 16 | 45.141 | 1.533  | -10.300 | 1.00 | 0.60  | O |
| ATOM | 134 | O   | SER | A | 16 | 45.431 | 0.776  | -11.228 | 1.00 | -0.57 | O |
| ATOM | 135 | CB  | SER | A | 16 | 46.719 | 3.498  | -10.556 | 1.00 | 0.21  | C |
| ATOM | 136 | OG  | SER | A | 16 | 47.347 | 3.313  | -9.302  | 1.00 | -0.65 | O |
| ATOM | 137 | N   | HIS | A | 17 | 44.720 | 1.024  | -9.124  | 1.00 | -0.42 | N |
| ATOM | 138 | CA  | HIS | A | 17 | 44.810 | -0.426 | -8.800  | 1.00 | -0.06 | C |
| ATOM | 139 | C   | HIS | A | 17 | 43.478 | -1.216 | -8.908  | 1.00 | 0.60  | C |
| ATOM | 140 | O   | HIS | A | 17 | 43.452 | -2.380 | -8.507  | 1.00 | -0.57 | O |
| ATOM | 141 | CB  | HIS | A | 17 | 45.500 | -0.685 | -7.435  | 1.00 | -0.01 | C |
| ATOM | 142 | CG  | HIS | A | 17 | 46.972 | -0.358 | -7.279  | 1.00 | 0.19  | C |
| ATOM | 143 | CD2 | HIS | A | 17 | 47.764 | 0.347  | -8.141  | 1.00 | -0.22 | C |
| ATOM | 144 | ND1 | HIS | A | 17 | 47.760 | -0.778 | -6.195  | 1.00 | -0.54 | N |
| ATOM | 145 | CE1 | HIS | A | 17 | 48.999 | -0.320 | -6.445  | 1.00 | 0.16  | C |
| ATOM | 146 | NE2 | HIS | A | 17 | 49.027 | 0.363  | -7.602  | 1.00 | -0.28 | N |
| ATOM | 147 | N   | HIS | A | 18 | 42.413 | -0.645 | -9.495  | 1.00 | -0.42 | N |
| ATOM | 148 | CA  | HIS | A | 18 | 41.183 | -1.364 | -9.917  | 1.00 | 0.02  | C |
| ATOM | 149 | C   | HIS | A | 18 | 41.054 | -1.498 | -11.467 | 1.00 | 0.60  | C |
| ATOM | 150 | O   | HIS | A | 18 | 40.006 | -1.914 | -11.963 | 1.00 | -0.57 | O |
| ATOM | 151 | CB  | HIS | A | 18 | 39.925 | -0.646 | -9.371  | 1.00 | -0.05 | C |
| ATOM | 152 | CG  | HIS | A | 18 | 39.454 | -0.999 | -7.979  | 1.00 | -0.03 | C |

|      |     |     |     |   |    |        |        |         |      |       |   |
|------|-----|-----|-----|---|----|--------|--------|---------|------|-------|---|
| ATOM | 153 | CD2 | HIS | A | 18 | 39.388 | -0.160 | -6.902  | 1.00 | 0.13  | C |
| ATOM | 154 | ND1 | HIS | A | 18 | 38.807 | -2.157 | -7.605  | 1.00 | -0.38 | N |
| ATOM | 155 | CE1 | HIS | A | 18 | 38.390 | -2.014 | -6.338  | 1.00 | 0.21  | C |
| ATOM | 156 | NE2 | HIS | A | 18 | 38.733 | -0.816 | -5.856  | 1.00 | -0.57 | N |
| ATOM | 157 | N   | PRO | A | 19 | 42.094 | -1.160 | -12.253 | 1.00 | -0.25 | N |
| ATOM | 158 | CA  | PRO | A | 19 | 42.166 | -0.200 | -13.367 | 1.00 | -0.03 | C |
| ATOM | 159 | C   | PRO | A | 19 | 40.922 | 0.445  | -14.014 | 1.00 | 0.59  | O |
| ATOM | 160 | O   | PRO | A | 19 | 41.060 | 1.557  | -14.514 | 1.00 | -0.57 | C |
| ATOM | 161 | CB  | PRO | A | 19 | 43.003 | -0.927 | -14.417 | 1.00 | -0.01 | C |
| ATOM | 162 | CG  | PRO | A | 19 | 44.049 | -1.642 | -13.563 | 1.00 | 0.02  | C |
| ATOM | 163 | CD  | PRO | A | 19 | 43.300 | -1.979 | -12.269 | 1.00 | 0.02  | C |
| ATOM | 164 | N   | GLU | A | 20 | 39.745 | -0.196 | -14.017 | 1.00 | -0.52 | N |
| ATOM | 165 | CA  | GLU | A | 20 | 38.534 | 0.121  | -14.822 | 1.00 | 0.04  | C |
| ATOM | 166 | C   | GLU | A | 20 | 37.958 | 1.547  | -14.732 | 1.00 | 0.54  | O |
| ATOM | 167 | O   | GLU | A | 20 | 37.191 | 1.952  | -15.604 | 1.00 | -0.58 | C |
| ATOM | 168 | CB  | GLU | A | 20 | 37.404 | -0.846 | -14.421 | 1.00 | 0.06  | C |
| ATOM | 169 | CG  | GLU | A | 20 | 37.654 | -2.305 | -14.808 | 1.00 | 0.01  | C |
| ATOM | 170 | CD  | GLU | A | 20 | 37.465 | -2.534 | -16.301 | 1.00 | 0.81  | C |
| ATOM | 171 | OE1 | GLU | A | 20 | 36.294 | -2.638 | -16.737 | 1.00 | -0.82 | O |
| ATOM | 172 | OE2 | GLU | A | 20 | 38.496 | -2.631 | -17.000 | 1.00 | -0.82 | O |
| ATOM | 173 | N   | VAL | A | 21 | 38.278 | 2.306  | -13.678 | 1.00 | -0.42 | N |
| ATOM | 174 | CA  | VAL | A | 21 | 37.644 | 3.602  | -13.336 | 1.00 | -0.09 | C |
| ATOM | 175 | C   | VAL | A | 21 | 38.700 | 4.577  | -12.775 | 1.00 | 0.60  | C |
| ATOM | 176 | O   | VAL | A | 21 | 38.654 | 4.907  | -11.588 | 1.00 | -0.57 | O |
| ATOM | 177 | CB  | VAL | A | 21 | 36.445 | 3.438  | -12.359 | 1.00 | 0.30  | C |
| ATOM | 178 | CG1 | VAL | A | 21 | 35.589 | 4.717  | -12.280 | 1.00 | -0.32 | C |
| ATOM | 179 | CG2 | VAL | A | 21 | 35.489 | 2.300  | -12.746 | 1.00 | -0.32 | C |
| ATOM | 180 | N   | PRO | A | 22 | 39.688 | 5.013  | -13.581 | 1.00 | -0.25 | N |
| ATOM | 181 | CA  | PRO | A | 22 | 40.837 | 5.791  | -13.107 | 1.00 | -0.03 | C |
| ATOM | 182 | C   | PRO | A | 22 | 40.437 | 7.155  | -12.528 | 1.00 | 0.59  | C |
| ATOM | 183 | O   | PRO | A | 22 | 39.351 | 7.673  | -12.782 | 1.00 | -0.57 | O |
| ATOM | 184 | CB  | PRO | A | 22 | 41.769 | 5.914  | -14.317 | 1.00 | -0.01 | C |
| ATOM | 185 | CG  | PRO | A | 22 | 40.827 | 5.798  | -15.514 | 1.00 | 0.02  | C |
| ATOM | 186 | CD  | PRO | A | 22 | 39.757 | 4.826  | -15.022 | 1.00 | 0.02  | C |
| ATOM | 187 | N   | GLN | A | 23 | 41.348 | 7.778  | -11.779 | 1.00 | -0.42 | N |
| ATOM | 188 | CA  | GLN | A | 23 | 41.185 | 9.105  | -11.158 | 1.00 | -0.00 | C |
| ATOM | 189 | C   | GLN | A | 23 | 39.933 | 9.288  | -10.269 | 1.00 | 0.60  | C |
| ATOM | 190 | O   | GLN | A | 23 | 39.288 | 10.341 | -10.329 | 1.00 | -0.57 | O |
| ATOM | 191 | CB  | GLN | A | 23 | 41.344 | 10.235 | -12.208 | 1.00 | -0.00 | C |
| ATOM | 192 | CG  | GLN | A | 23 | 42.549 | 10.100 | -13.161 | 1.00 | -0.06 | C |
| ATOM | 193 | CD  | GLN | A | 23 | 43.736 | 9.431  | -12.491 | 1.00 | 0.70  | C |
| ATOM | 194 | NE2 | GLN | A | 23 | 44.352 | 10.071 | -11.515 | 1.00 | -0.94 | N |
| ATOM | 195 | OE1 | GLN | A | 23 | 44.056 | 8.293  | -12.793 | 1.00 | -0.61 | O |
| ATOM | 196 | N   | ARG | A | 24 | 39.604 | 8.292  | -9.428  | 1.00 | -0.35 | N |
| ATOM | 197 | CA  | ARG | A | 24 | 38.401 | 8.316  | -8.580  | 1.00 | -0.26 | C |
| ATOM | 198 | C   | ARG | A | 24 | 38.665 | 8.424  | -7.058  | 1.00 | 0.73  | C |
| ATOM | 199 | O   | ARG | A | 24 | 37.694 | 8.536  | -6.302  | 1.00 | -0.59 | O |
| ATOM | 200 | CB  | ARG | A | 24 | 37.497 | 7.122  | -8.931  | 1.00 | -0.00 | C |
| ATOM | 201 | CG  | ARG | A | 24 | 36.003 | 7.446  | -8.787  | 1.00 | 0.04  | C |
| ATOM | 202 | CD  | ARG | A | 24 | 35.162 | 6.170  | -8.722  | 1.00 | 0.05  | C |
| ATOM | 203 | NE  | ARG | A | 24 | 35.115 | 5.658  | -7.344  | 1.00 | -0.53 | N |
| ATOM | 204 | CZ  | ARG | A | 24 | 34.152 | 4.911  | -6.818  | 1.00 | 0.81  | C |
| ATOM | 205 | NH1 | ARG | A | 24 | 33.116 | 4.479  | -7.493  | 1.00 | -0.86 | N |
| ATOM | 206 | NH2 | ARG | A | 24 | 34.185 | 4.557  | -5.558  | 1.00 | -0.86 | N |
| ATOM | 207 | N   | ILE | A | 25 | 39.931 | 8.503  | -6.606  | 1.00 | -0.42 | N |
| ATOM | 208 | CA  | ILE | A | 25 | 40.274 | 8.935  | -5.238  | 1.00 | -0.06 | C |
| ATOM | 209 | C   | ILE | A | 25 | 40.786 | 10.368 | -5.224  | 1.00 | 0.60  | C |
| ATOM | 210 | O   | ILE | A | 25 | 40.218 | 11.177 | -4.485  | 1.00 | -0.57 | O |
| ATOM | 211 | CB  | ILE | A | 25 | 41.233 | 7.990  | -4.464  | 1.00 | 0.13  | C |
| ATOM | 212 | CG1 | ILE | A | 25 | 41.601 | 8.641  | -3.114  | 1.00 | -0.04 | C |
| ATOM | 213 | CG2 | ILE | A | 25 | 42.470 | 7.499  | -5.217  | 1.00 | -0.32 | C |
| ATOM | 214 | CD1 | ILE | A | 25 | 42.159 | 7.677  | -2.076  | 1.00 | -0.07 | C |
| ATOM | 215 | N   | LEU | A | 26 | 41.812 | 10.708 | -6.013  | 1.00 | -0.42 | N |
| ATOM | 216 | CA  | LEU | A | 26 | 42.434 | 12.033 | -5.930  | 1.00 | -0.05 | C |
| ATOM | 217 | C   | LEU | A | 26 | 41.397 | 13.150 | -6.133  | 1.00 | 0.60  | O |
| ATOM | 218 | O   | LEU | A | 26 | 41.415 | 14.171 | -5.449  | 1.00 | -0.57 | O |
| ATOM | 219 | CB  | LEU | A | 26 | 43.592 | 12.096 | -6.939  | 1.00 | -0.11 | C |
| ATOM | 220 | CG  | LEU | A | 26 | 44.295 | 13.466 | -7.004  | 1.00 | 0.35  | C |
| ATOM | 221 | CD1 | LEU | A | 26 | 44.882 | 13.904 | -5.659  | 1.00 | -0.41 | C |
| ATOM | 222 | CD2 | LEU | A | 26 | 45.425 | 13.408 | -8.032  | 1.00 | -0.41 | C |
| ATOM | 223 | N   | ARG | A | 27 | 40.437 | 12.894 | -7.027  | 1.00 | -0.35 | N |
| ATOM | 224 | CA  | ARG | A | 27 | 39.326 | 13.776 | -7.377  | 1.00 | -0.26 | C |
| ATOM | 225 | C   | ARG | A | 27 | 38.195 | 13.874 | -6.318  | 1.00 | 0.73  | C |
| ATOM | 226 | O   | ARG | A | 27 | 37.305 | 14.716 | -6.472  | 1.00 | -0.59 | O |
| ATOM | 227 | CB  | ARG | A | 27 | 38.827 | 13.335 | -8.763  | 1.00 | -0.00 | C |
| ATOM | 228 | CG  | ARG | A | 27 | 37.946 | 14.387 | -9.447  | 1.00 | 0.04  | C |
| ATOM | 229 | CD  | ARG | A | 27 | 37.808 | 14.086 | -10.942 | 1.00 | 0.05  | C |

|      |     |     |     |   |    |        |        |         |      |       |   |
|------|-----|-----|-----|---|----|--------|--------|---------|------|-------|---|
| ATOM | 230 | NE  | ARG | A | 27 | 36.711 | 14.875 | -11.523 | 1.00 | -0.53 | N |
| ATOM | 231 | CZ  | ARG | A | 27 | 36.746 | 16.114 | -11.998 | 1.00 | 0.81  | C |
| ATOM | 232 | NH1 | ARG | A | 27 | 35.617 | 16.698 | -12.331 | 1.00 | -0.86 | N |
| ATOM | 233 | NH2 | ARG | A | 27 | 37.861 | 16.804 | -12.141 | 1.00 | -0.86 | N |
| ATOM | 234 | N   | ILE | A | 28 | 38.236 | 13.104 | -5.215  | 1.00 | -0.42 | N |
| ATOM | 235 | CA  | ILE | A | 28 | 37.404 | 13.323 | -4.007  | 1.00 | -0.06 | C |
| ATOM | 236 | C   | ILE | A | 28 | 38.245 | 13.736 | -2.790  | 1.00 | 0.60  | O |
| ATOM | 237 | O   | ILE | A | 28 | 37.821 | 14.621 | -2.045  | 1.00 | -0.57 | C |
| ATOM | 238 | CB  | ILE | A | 28 | 36.424 | 12.151 | -3.718  | 1.00 | 0.13  | C |
| ATOM | 239 | CG1 | ILE | A | 28 | 35.645 | 12.285 | -2.385  | 1.00 | -0.04 | C |
| ATOM | 240 | CG2 | ILE | A | 28 | 37.101 | 10.771 | -3.698  | 1.00 | -0.32 | C |
| ATOM | 241 | CD1 | ILE | A | 28 | 34.818 | 13.567 | -2.216  | 1.00 | -0.07 | C |
| ATOM | 242 | N   | MET | A | 29 | 39.475 | 13.227 | -2.633  | 1.00 | -0.42 | N |
| ATOM | 243 | CA  | MET | A | 29 | 40.404 | 13.837 | -1.673  | 1.00 | -0.02 | C |
| ATOM | 244 | C   | MET | A | 29 | 40.575 | 15.339 | -1.959  | 1.00 | 0.60  | C |
| ATOM | 245 | O   | MET | A | 29 | 40.457 | 16.132 | -1.032  | 1.00 | -0.57 | O |
| ATOM | 246 | CB  | MET | A | 29 | 41.745 | 13.102 | -1.640  | 1.00 | 0.03  | C |
| ATOM | 247 | CG  | MET | A | 29 | 41.610 | 11.694 | -1.044  | 1.00 | 0.00  | C |
| ATOM | 248 | SD  | MET | A | 29 | 40.954 | 11.600 | 0.650   | 1.00 | -0.27 | S |
| ATOM | 249 | CE  | MET | A | 29 | 41.012 | 9.807  | 0.883   | 1.00 | -0.05 | C |
| ATOM | 250 | N   | CYS | A | 30 | 40.664 | 15.751 | -3.232  | 1.00 | -0.42 | N |
| ATOM | 251 | CA  | CYS | A | 30 | 40.521 | 17.147 | -3.639  | 1.00 | 0.02  | C |
| ATOM | 252 | C   | CYS | A | 30 | 39.266 | 17.811 | -3.039  | 1.00 | 0.60  | C |
| ATOM | 253 | O   | CYS | A | 30 | 39.390 | 18.780 | -2.303  | 1.00 | -0.57 | O |
| ATOM | 254 | CB  | CYS | A | 30 | 40.499 | 17.211 | -5.173  | 1.00 | -0.12 | C |
| ATOM | 255 | SG  | CYS | A | 30 | 40.521 | 18.926 | -5.765  | 1.00 | -0.31 | S |
| ATOM | 256 | N   | ARG | A | 31 | 38.058 | 17.292 | -3.300  | 1.00 | -0.35 | N |
| ATOM | 257 | CA  | ARG | A | 31 | 36.803 | 17.968 | -2.934  | 1.00 | -0.26 | C |
| ATOM | 258 | C   | ARG | A | 31 | 36.534 | 17.984 | -1.407  | 1.00 | 0.73  | C |
| ATOM | 259 | O   | ARG | A | 31 | 35.837 | 18.875 | -0.917  | 1.00 | -0.59 | O |
| ATOM | 260 | CB  | ARG | A | 31 | 35.640 | 17.354 | -3.741  | 1.00 | -0.00 | C |
| ATOM | 261 | CG  | ARG | A | 31 | 34.630 | 18.396 | -4.259  | 1.00 | 0.04  | C |
| ATOM | 262 | CD  | ARG | A | 31 | 33.504 | 17.712 | -5.065  | 1.00 | 0.05  | C |
| ATOM | 263 | NE  | ARG | A | 31 | 32.548 | 18.648 | -5.703  | 1.00 | -0.53 | N |
| ATOM | 264 | CZ  | ARG | A | 31 | 31.681 | 19.449 | -5.092  | 1.00 | 0.81  | C |
| ATOM | 265 | NH1 | ARG | A | 31 | 30.881 | 20.239 | -5.768  | 1.00 | -0.86 | N |
| ATOM | 266 | NH2 | ARG | A | 31 | 31.583 | 19.464 | -3.780  | 1.00 | -0.86 | N |
| ATOM | 267 | N   | LEU | A | 32 | 37.099 | 17.035 | -0.639  | 1.00 | -0.42 | N |
| ATOM | 268 | CA  | LEU | A | 32 | 37.055 | 17.056 | 0.835   | 1.00 | -0.05 | C |
| ATOM | 269 | C   | LEU | A | 32 | 38.061 | 18.049 | 1.466   | 1.00 | 0.60  | C |
| ATOM | 270 | O   | LEU | A | 32 | 37.799 | 18.571 | 2.556   | 1.00 | -0.57 | O |
| ATOM | 271 | CB  | LEU | A | 32 | 37.315 | 15.645 | 1.403   | 1.00 | -0.11 | C |
| ATOM | 272 | CG  | LEU | A | 32 | 36.322 | 14.541 | 0.986   | 1.00 | 0.35  | C |
| ATOM | 273 | CD1 | LEU | A | 32 | 36.673 | 13.230 | 1.699   | 1.00 | -0.41 | C |
| ATOM | 274 | CD2 | LEU | A | 32 | 34.852 | 14.883 | 1.253   | 1.00 | -0.41 | C |
| ATOM | 275 | N   | GLU | A | 33 | 39.192 | 18.292 | 0.790   | 1.00 | -0.52 | N |
| ATOM | 276 | CA  | GLU | A | 33 | 40.295 | 19.185 | 1.192   | 1.00 | 0.04  | C |
| ATOM | 277 | C   | GLU | A | 33 | 40.015 | 20.636 | 0.759   | 1.00 | 0.54  | O |
| ATOM | 278 | O   | GLU | A | 33 | 40.110 | 21.549 | 1.577   | 1.00 | -0.58 | C |
| ATOM | 279 | CB  | GLU | A | 33 | 41.585 | 18.582 | 0.586   | 1.00 | 0.06  | C |
| ATOM | 280 | CG  | GLU | A | 33 | 42.921 | 18.889 | 1.260   | 1.00 | 0.01  | C |
| ATOM | 281 | CD  | GLU | A | 33 | 43.963 | 17.864 | 0.791   | 1.00 | 0.81  | C |
| ATOM | 282 | OE1 | GLU | A | 33 | 43.946 | 16.724 | 1.317   | 1.00 | -0.82 | O |
| ATOM | 283 | OE2 | GLU | A | 33 | 44.771 | 18.219 | -0.093  | 1.00 | -0.82 | O |
| ATOM | 284 | N   | GLU | A | 34 | 39.521 | 20.820 | -0.474  | 1.00 | -0.52 | N |
| ATOM | 285 | CA  | GLU | A | 34 | 38.975 | 22.051 | -1.092  | 1.00 | 0.04  | C |
| ATOM | 286 | C   | GLU | A | 34 | 37.892 | 22.740 | -0.259  | 1.00 | 0.54  | C |
| ATOM | 287 | O   | GLU | A | 34 | 37.866 | 23.966 | -0.166  | 1.00 | -0.58 | O |
| ATOM | 288 | CB  | GLU | A | 34 | 38.384 | 21.655 | -2.461  | 1.00 | 0.06  | C |
| ATOM | 289 | CG  | GLU | A | 34 | 37.703 | 22.756 | -3.277  | 1.00 | 0.01  | C |
| ATOM | 290 | CD  | GLU | A | 34 | 37.054 | 22.146 | -4.516  | 1.00 | 0.81  | C |
| ATOM | 291 | OE1 | GLU | A | 34 | 35.914 | 21.646 | -4.379  | 1.00 | -0.82 | O |
| ATOM | 292 | OE2 | GLU | A | 34 | 37.707 | 22.180 | -5.583  | 1.00 | -0.82 | O |
| ATOM | 293 | N   | LEU | A | 35 | 36.997 | 21.951 | 0.347   | 1.00 | -0.42 | N |
| ATOM | 294 | CA  | LEU | A | 35 | 35.808 | 22.446 | 1.054   | 1.00 | -0.05 | C |
| ATOM | 295 | C   | LEU | A | 35 | 35.898 | 22.238 | 2.580   | 1.00 | 0.60  | C |
| ATOM | 296 | O   | LEU | A | 35 | 34.887 | 22.265 | 3.285   | 1.00 | -0.57 | O |
| ATOM | 297 | CB  | LEU | A | 35 | 34.550 | 21.831 | 0.405   | 1.00 | -0.11 | C |
| ATOM | 298 | CG  | LEU | A | 35 | 34.413 | 22.109 | -1.111  | 1.00 | 0.35  | C |
| ATOM | 299 | CD1 | LEU | A | 35 | 33.172 | 21.401 | -1.659  | 1.00 | -0.41 | C |
| ATOM | 300 | CD2 | LEU | A | 35 | 34.284 | 23.604 | -1.431  | 1.00 | -0.41 | C |
| ATOM | 301 | N   | GLY | A | 36 | 37.116 | 22.020 | 3.098   | 1.00 | -0.42 | N |
| ATOM | 302 | CA  | GLY | A | 36 | 37.409 | 21.948 | 4.531   | 1.00 | -0.03 | C |
| ATOM | 303 | C   | GLY | A | 36 | 36.677 | 20.840 | 5.296   | 1.00 | 0.60  | C |
| ATOM | 304 | O   | GLY | A | 36 | 36.524 | 20.951 | 6.514   | 1.00 | -0.57 | O |
| ATOM | 305 | N   | LEU | A | 37 | 36.228 | 19.777 | 4.619   | 1.00 | -0.42 | N |
| ATOM | 306 | CA  | LEU | A | 37 | 35.631 | 18.621 | 5.287   | 1.00 | -0.05 | C |

|      |     |     |     |   |    |        |        |        |      |       |   |
|------|-----|-----|-----|---|----|--------|--------|--------|------|-------|---|
| ATOM | 307 | C   | LEU | A | 37 | 36.738 | 17.788 | 5.951  | 1.00 | 0.60  | C |
| ATOM | 308 | O   | LEU | A | 37 | 36.616 | 17.422 | 7.120  | 1.00 | -0.57 | O |
| ATOM | 309 | CB  | LEU | A | 37 | 34.777 | 17.801 | 4.300  | 1.00 | -0.11 | C |
| ATOM | 310 | CG  | LEU | A | 37 | 33.629 | 18.591 | 3.629  | 1.00 | 0.35  | C |
| ATOM | 311 | CD1 | LEU | A | 37 | 32.643 | 17.644 | 2.947  | 1.00 | -0.41 | C |
| ATOM | 312 | CD2 | LEU | A | 37 | 32.818 | 19.451 | 4.602  | 1.00 | -0.41 | C |
| ATOM | 313 | N   | ALA | A | 38 | 37.870 | 17.595 | 5.261  | 1.00 | -0.42 | N |
| ATOM | 314 | CA  | ALA | A | 38 | 39.100 | 17.048 | 5.847  | 1.00 | 0.03  | C |
| ATOM | 315 | C   | ALA | A | 38 | 39.573 | 17.876 | 7.064  | 1.00 | 0.60  | C |
| ATOM | 316 | O   | ALA | A | 38 | 39.961 | 17.312 | 8.088  | 1.00 | -0.57 | O |
| ATOM | 317 | CB  | ALA | A | 38 | 40.180 | 16.971 | 4.762  | 1.00 | -0.18 | C |
| ATOM | 318 | N   | GLY | A | 39 | 39.413 | 19.207 | 6.999  | 1.00 | -0.42 | N |
| ATOM | 319 | CA  | GLY | A | 39 | 39.619 | 20.155 | 8.100  | 1.00 | -0.03 | C |
| ATOM | 320 | C   | GLY | A | 39 | 38.688 | 19.970 | 9.308  | 1.00 | 0.60  | C |
| ATOM | 321 | O   | GLY | A | 39 | 38.825 | 20.694 | 10.288 | 1.00 | -0.57 | O |
| ATOM | 322 | N   | ARG | A | 40 | 37.765 | 19.004 | 9.261  | 1.00 | -0.35 | N |
| ATOM | 323 | CA  | ARG | A | 40 | 36.905 | 18.594 | 10.376 | 1.00 | -0.26 | C |
| ATOM | 324 | C   | ARG | A | 40 | 36.932 | 17.063 | 10.586 | 1.00 | 0.73  | C |
| ATOM | 325 | O   | ARG | A | 40 | 36.065 | 16.506 | 11.254 | 1.00 | -0.59 | O |
| ATOM | 326 | CB  | ARG | A | 40 | 35.487 | 19.152 | 10.149 | 1.00 | -0.00 | C |
| ATOM | 327 | CG  | ARG | A | 40 | 35.441 | 20.680 | 10.323 | 1.00 | 0.04  | C |
| ATOM | 328 | CD  | ARG | A | 40 | 34.025 | 21.232 | 10.146 | 1.00 | 0.05  | C |
| ATOM | 329 | NE  | ARG | A | 40 | 33.611 | 21.232 | 8.733  | 1.00 | -0.53 | N |
| ATOM | 330 | CZ  | ARG | A | 40 | 32.352 | 21.245 | 8.301  | 1.00 | 0.81  | C |
| ATOM | 331 | NH1 | ARG | A | 40 | 32.051 | 21.370 | 7.034  | 1.00 | -0.86 | N |
| ATOM | 332 | NH2 | ARG | A | 40 | 31.302 | 21.125 | 9.073  | 1.00 | -0.86 | N |
| ATOM | 333 | N   | CYS | A | 41 | 37.939 | 16.367 | 10.038 | 1.00 | -0.42 | N |
| ATOM | 334 | CA  | CYS | A | 41 | 38.101 | 14.915 | 10.164 | 1.00 | 0.02  | C |
| ATOM | 335 | C   | CYS | A | 41 | 39.375 | 14.531 | 10.934 | 1.00 | 0.60  | C |
| ATOM | 336 | O   | CYS | A | 41 | 40.444 | 15.102 | 10.720 | 1.00 | -0.57 | O |
| ATOM | 337 | CB  | CYS | A | 41 | 38.165 | 14.288 | 8.767  | 1.00 | -0.12 | C |
| ATOM | 338 | SG  | CYS | A | 41 | 36.560 | 14.379 | 7.935  | 1.00 | -0.31 | S |
| ATOM | 339 | N   | LEU | A | 42 | 39.283 | 13.500 | 11.790 | 1.00 | -0.42 | N |
| ATOM | 340 | CA  | LEU | A | 42 | 40.446 | 12.872 | 12.423 | 1.00 | -0.05 | C |
| ATOM | 341 | C   | LEU | A | 42 | 41.286 | 12.096 | 11.386 | 1.00 | 0.60  | C |
| ATOM | 342 | O   | LEU | A | 42 | 40.996 | 10.929 | 11.101 | 1.00 | -0.57 | O |
| ATOM | 343 | CB  | LEU | A | 42 | 39.978 | 11.981 | 13.593 | 1.00 | -0.11 | C |
| ATOM | 344 | CG  | LEU | A | 42 | 41.130 | 11.276 | 14.342 | 1.00 | 0.35  | C |
| ATOM | 345 | CD1 | LEU | A | 42 | 42.131 | 12.259 | 14.959 | 1.00 | -0.41 | C |
| ATOM | 346 | CD2 | LEU | A | 42 | 40.586 | 10.406 | 15.469 | 1.00 | -0.41 | C |
| ATOM | 347 | N   | THR | A | 43 | 42.295 | 12.747 | 10.800 | 1.00 | -0.42 | N |
| ATOM | 348 | CA  | THR | A | 43 | 43.254 | 12.136 | 9.865  | 1.00 | -0.04 | C |
| ATOM | 349 | C   | THR | A | 43 | 44.102 | 11.045 | 10.541 | 1.00 | 0.60  | C |
| ATOM | 350 | O   | THR | A | 43 | 44.807 | 11.310 | 11.516 | 1.00 | -0.57 | O |
| ATOM | 351 | CB  | THR | A | 43 | 44.187 | 13.210 | 9.265  | 1.00 | 0.37  | C |
| ATOM | 352 | CG2 | THR | A | 43 | 45.198 | 12.650 | 8.259  | 1.00 | -0.24 | C |
| ATOM | 353 | OG1 | THR | A | 43 | 43.431 | 14.185 | 8.585  | 1.00 | -0.68 | O |
| ATOM | 354 | N   | LEU | A | 44 | 44.070 | 9.832  | 9.972  | 1.00 | -0.42 | N |
| ATOM | 355 | CA  | LEU | A | 44 | 44.887 | 8.692  | 10.388 | 1.00 | -0.05 | C |
| ATOM | 356 | C   | LEU | A | 44 | 45.720 | 8.155  | 9.210  | 1.00 | 0.60  | C |
| ATOM | 357 | O   | LEU | A | 44 | 45.167 | 7.722  | 8.197  | 1.00 | -0.57 | O |
| ATOM | 358 | CB  | LEU | A | 44 | 43.981 | 7.569  | 10.936 | 1.00 | -0.11 | C |
| ATOM | 359 | CG  | LEU | A | 44 | 43.056 | 7.939  | 12.110 | 1.00 | 0.35  | C |
| ATOM | 360 | CD1 | LEU | A | 44 | 42.205 | 6.721  | 12.478 | 1.00 | -0.41 | C |
| ATOM | 361 | CD2 | LEU | A | 44 | 43.812 | 8.394  | 13.361 | 1.00 | -0.41 | C |
| ATOM | 362 | N   | THR | A | 45 | 47.047 | 8.123  | 9.370  | 1.00 | -0.42 | N |
| ATOM | 363 | CA  | THR | A | 45 | 47.937 | 7.328  | 8.512  | 1.00 | -0.04 | C |
| ATOM | 364 | C   | THR | A | 45 | 47.548 | 5.828  | 8.595  | 1.00 | 0.60  | C |
| ATOM | 365 | O   | THR | A | 45 | 47.149 | 5.364  | 9.672  | 1.00 | -0.57 | O |
| ATOM | 366 | CB  | THR | A | 45 | 49.406 | 7.543  | 8.936  | 1.00 | 0.37  | C |
| ATOM | 367 | CG2 | THR | A | 45 | 50.440 | 6.988  | 7.954  | 1.00 | -0.24 | C |
| ATOM | 368 | OG1 | THR | A | 45 | 49.688 | 8.921  | 9.081  | 1.00 | -0.68 | O |
| ATOM | 369 | N   | PRO | A | 46 | 47.622 | 5.052  | 7.487  | 1.00 | -0.25 | N |
| ATOM | 370 | CA  | PRO | A | 46 | 47.284 | 3.619  | 7.406  | 1.00 | -0.03 | C |
| ATOM | 371 | C   | PRO | A | 46 | 47.929 | 2.655  | 8.412  | 1.00 | 0.59  | C |
| ATOM | 372 | O   | PRO | A | 46 | 48.974 | 2.931  | 8.995  | 1.00 | -0.57 | O |
| ATOM | 373 | CB  | PRO | A | 46 | 47.737 | 3.181  | 6.007  | 1.00 | -0.01 | C |
| ATOM | 374 | CG  | PRO | A | 46 | 47.561 | 4.434  | 5.175  | 1.00 | 0.02  | C |
| ATOM | 375 | CD  | PRO | A | 46 | 47.901 | 5.556  | 6.148  | 1.00 | 0.02  | C |
| ATOM | 376 | N   | ARG | A | 47 | 47.373 | 1.436  | 8.437  | 1.00 | -0.35 | N |
| ATOM | 377 | CA  | ARG | A | 47 | 48.171 | 0.208  | 8.433  | 1.00 | -0.26 | C |
| ATOM | 378 | C   | ARG | A | 47 | 47.710 | -0.654 | 7.241  | 1.00 | 0.73  | C |
| ATOM | 379 | O   | ARG | A | 47 | 46.563 | -0.496 | 6.809  | 1.00 | -0.59 | O |
| ATOM | 380 | CB  | ARG | A | 47 | 48.110 | -0.565 | 9.770  | 1.00 | -0.00 | C |
| ATOM | 381 | CG  | ARG | A | 47 | 46.862 | -1.442 | 10.029 | 1.00 | 0.04  | C |
| ATOM | 382 | CD  | ARG | A | 47 | 47.186 | -2.525 | 11.071 | 1.00 | 0.05  | C |
| ATOM | 383 | NE  | ARG | A | 47 | 46.072 | -3.465 | 11.273 | 1.00 | -0.53 | N |

|      |     |     |     |   |    |        |         |        |      |       |   |
|------|-----|-----|-----|---|----|--------|---------|--------|------|-------|---|
| ATOM | 384 | CZ  | ARG | A | 47 | 45.082 | -3.358  | 12.150 | 1.00 | 0.81  | C |
| ATOM | 385 | NH1 | ARG | A | 47 | 44.235 | -4.344  | 12.286 | 1.00 | -0.86 | N |
| ATOM | 386 | NH2 | ARG | A | 47 | 44.881 | -2.315  | 12.921 | 1.00 | -0.86 | N |
| ATOM | 387 | N   | PRO | A | 48 | 48.560 | -1.550  | 6.707  | 1.00 | -0.25 | N |
| ATOM | 388 | CA  | PRO | A | 48 | 48.144 | -2.618  | 5.798  | 1.00 | -0.03 | C |
| ATOM | 389 | C   | PRO | A | 48 | 47.500 | -3.781  | 6.569  | 1.00 | 0.59  | C |
| ATOM | 390 | O   | PRO | A | 48 | 47.695 | -3.929  | 7.780  | 1.00 | -0.57 | O |
| ATOM | 391 | CB  | PRO | A | 48 | 49.445 | -3.080  | 5.131  | 1.00 | -0.01 | C |
| ATOM | 392 | CG  | PRO | A | 48 | 50.500 | -2.858  | 6.215  | 1.00 | 0.02  | C |
| ATOM | 393 | CD  | PRO | A | 48 | 50.000 | -1.610  | 6.941  | 1.00 | 0.02  | C |
| ATOM | 394 | N   | ALA | A | 49 | 46.800 | -4.666  | 5.851  | 1.00 | -0.42 | N |
| ATOM | 395 | CA  | ALA | A | 49 | 46.440 | -5.975  | 6.393  | 1.00 | 0.03  | C |
| ATOM | 396 | C   | ALA | A | 49 | 47.660 | -6.915  | 6.442  | 1.00 | 0.60  | C |
| ATOM | 397 | O   | ALA | A | 49 | 48.279 | -7.173  | 5.406  | 1.00 | -0.57 | O |
| ATOM | 398 | CB  | ALA | A | 49 | 45.349 | -6.577  | 5.516  | 1.00 | -0.18 | C |
| ATOM | 399 | N   | THR | A | 50 | 47.982 | -7.477  | 7.615  | 1.00 | -0.42 | N |
| ATOM | 400 | CA  | THR | A | 50 | 48.855 | -8.663  | 7.705  | 1.00 | -0.04 | C |
| ATOM | 401 | C   | THR | A | 50 | 48.248 | -9.799  | 6.868  | 1.00 | 0.60  | C |
| ATOM | 402 | O   | THR | A | 50 | 47.021 | -9.913  | 6.803  | 1.00 | -0.57 | O |
| ATOM | 403 | CB  | THR | A | 50 | 48.997 | -9.203  | 9.154  | 1.00 | 0.37  | C |
| ATOM | 404 | CG2 | THR | A | 50 | 50.194 | -10.145 | 9.332  | 1.00 | -0.24 | C |
| ATOM | 405 | OG1 | THR | A | 50 | 49.172 | -8.199  | 10.121 | 1.00 | -0.68 | O |
| ATOM | 406 | N   | GLU | A | 51 | 49.069 | -10.705 | 6.314  | 1.00 | -0.52 | N |
| ATOM | 407 | CA  | GLU | A | 51 | 48.578 | -11.956 | 5.697  | 1.00 | 0.04  | C |
| ATOM | 408 | C   | GLU | A | 51 | 47.607 | -12.715 | 6.623  | 1.00 | 0.54  | C |
| ATOM | 409 | O   | GLU | A | 51 | 46.610 | -13.279 | 6.173  | 1.00 | -0.58 | O |
| ATOM | 410 | CB  | GLU | A | 51 | 49.761 | -12.860 | 5.302  | 1.00 | 0.06  | C |
| ATOM | 411 | CG  | GLU | A | 51 | 49.533 | -13.677 | 4.023  | 1.00 | 0.01  | C |
| ATOM | 412 | CD  | GLU | A | 51 | 49.634 | -12.853 | 2.741  | 1.00 | 0.81  | C |
| ATOM | 413 | OE1 | GLU | A | 51 | 48.880 | -13.178 | 1.794  | 1.00 | -0.82 | O |
| ATOM | 414 | OE2 | GLU | A | 51 | 50.485 | -11.937 | 2.675  | 1.00 | -0.82 | O |
| ATOM | 415 | N   | ALA | A | 52 | 47.859 | -12.661 | 7.938  | 1.00 | -0.42 | N |
| ATOM | 416 | CA  | ALA | A | 52 | 46.986 | -13.200 | 8.983  | 1.00 | 0.03  | C |
| ATOM | 417 | C   | ALA | A | 52 | 45.638 | -12.461 | 9.129  | 1.00 | 0.60  | C |
| ATOM | 418 | O   | ALA | A | 52 | 44.620 | -13.118 | 9.349  | 1.00 | -0.57 | O |
| ATOM | 419 | CB  | ALA | A | 52 | 47.750 | -13.172 | 10.311 | 1.00 | -0.18 | C |
| ATOM | 420 | N   | GLU | A | 53 | 45.610 | -11.126 | 8.981  | 1.00 | -0.52 | N |
| ATOM | 421 | CA  | GLU | A | 53 | 44.371 | -10.329 | 8.952  | 1.00 | 0.04  | C |
| ATOM | 422 | C   | GLU | A | 53 | 43.568 | -10.646 | 7.688  | 1.00 | 0.54  | C |
| ATOM | 423 | O   | GLU | A | 53 | 42.359 | -10.868 | 7.791  | 1.00 | -0.58 | O |
| ATOM | 424 | CB  | GLU | A | 53 | 44.681 | -8.825  | 9.009  | 1.00 | 0.06  | C |
| ATOM | 425 | CG  | GLU | A | 53 | 45.086 | -8.352  | 10.406 | 1.00 | 0.01  | C |
| ATOM | 426 | CD  | GLU | A | 53 | 45.784 | -7.007  | 10.304 | 1.00 | 0.81  | C |
| ATOM | 427 | OE1 | GLU | A | 53 | 47.022 | -7.028  | 10.165 | 1.00 | -0.82 | O |
| ATOM | 428 | OE2 | GLU | A | 53 | 45.102 | -5.958  | 10.332 | 1.00 | -0.82 | O |
| ATOM | 429 | N   | LEU | A | 54 | 44.228 | -10.738 | 6.522  | 1.00 | -0.42 | N |
| ATOM | 430 | CA  | LEU | A | 54 | 43.576 | -11.192 | 5.284  | 1.00 | -0.05 | C |
| ATOM | 431 | C   | LEU | A | 54 | 42.957 | -12.596 | 5.441  | 1.00 | 0.60  | C |
| ATOM | 432 | O   | LEU | A | 54 | 41.778 | -12.788 | 5.125  | 1.00 | -0.57 | O |
| ATOM | 433 | CB  | LEU | A | 54 | 44.563 | -11.173 | 4.095  | 1.00 | -0.11 | C |
| ATOM | 434 | CG  | LEU | A | 54 | 45.061 | -9.792  | 3.624  | 1.00 | 0.35  | C |
| ATOM | 435 | CD1 | LEU | A | 54 | 45.972 | -9.961  | 2.408  | 1.00 | -0.41 | C |
| ATOM | 436 | CD2 | LEU | A | 54 | 43.924 | -8.847  | 3.227  | 1.00 | -0.41 | C |
| ATOM | 437 | N   | LEU | A | 55 | 43.724 | -13.578 | 5.940  | 1.00 | -0.42 | N |
| ATOM | 438 | CA  | LEU | A | 55 | 43.285 | -14.974 | 6.061  | 1.00 | -0.05 | C |
| ATOM | 439 | C   | LEU | A | 55 | 42.039 | -15.166 | 6.954  | 1.00 | 0.60  | C |
| ATOM | 440 | O   | LEU | A | 55 | 41.310 | -16.141 | 6.783  | 1.00 | -0.57 | O |
| ATOM | 441 | CB  | LEU | A | 55 | 44.479 | -15.824 | 6.531  | 1.00 | -0.11 | C |
| ATOM | 442 | CG  | LEU | A | 55 | 44.212 | -17.342 | 6.634  | 1.00 | 0.35  | C |
| ATOM | 443 | CD1 | LEU | A | 55 | 43.696 | -17.971 | 5.334  | 1.00 | -0.41 | C |
| ATOM | 444 | CD2 | LEU | A | 55 | 45.505 | -18.060 | 7.028  | 1.00 | -0.41 | C |
| ATOM | 445 | N   | THR | A | 56 | 41.751 | -14.222 | 7.862  | 1.00 | -0.42 | N |
| ATOM | 446 | CA  | THR | A | 56 | 40.542 | -14.255 | 8.712  | 1.00 | -0.04 | C |
| ATOM | 447 | C   | THR | A | 56 | 39.222 | -14.501 | 7.961  | 1.00 | 0.60  | C |
| ATOM | 448 | O   | THR | A | 56 | 38.277 | -15.010 | 8.566  | 1.00 | -0.57 | O |
| ATOM | 449 | CB  | THR | A | 56 | 40.346 | -12.956 | 9.514  | 1.00 | 0.37  | C |
| ATOM | 450 | CG2 | THR | A | 56 | 41.468 | -12.648 | 10.502 | 1.00 | -0.24 | C |
| ATOM | 451 | OG1 | THR | A | 56 | 40.143 | -11.848 | 8.658  | 1.00 | -0.68 | O |
| ATOM | 452 | N   | CYS | A | 57 | 39.143 | -14.145 | 6.665  | 1.00 | -0.42 | N |
| ATOM | 453 | CA  | CYS | A | 57 | 37.895 | -14.182 | 5.894  | 1.00 | 0.02  | C |
| ATOM | 454 | C   | CYS | A | 57 | 38.011 | -14.689 | 4.442  | 1.00 | 0.60  | C |
| ATOM | 455 | O   | CYS | A | 57 | 36.988 | -14.745 | 3.761  | 1.00 | -0.57 | O |
| ATOM | 456 | CB  | CYS | A | 57 | 37.292 | -12.772 | 5.877  | 1.00 | -0.12 | C |
| ATOM | 457 | SG  | CYS | A | 57 | 37.106 | -12.088 | 7.552  | 1.00 | -0.31 | S |
| ATOM | 458 | N   | HIS | A | 58 | 39.203 | -15.052 | 3.937  | 1.00 | -0.42 | N |
| ATOM | 459 | CA  | HIS | A | 58 | 39.402 | -15.527 | 2.547  | 1.00 | 0.02  | C |
| ATOM | 460 | C   | HIS | A | 58 | 40.527 | -16.584 | 2.475  | 1.00 | 0.60  | C |

|      |     |     |     |   |    |        |         |         |      |       |   |
|------|-----|-----|-----|---|----|--------|---------|---------|------|-------|---|
| ATOM | 461 | O   | HIS | A | 58 | 41.422 | -16.573 | 3.321   | 1.00 | -0.57 | O |
| ATOM | 462 | CB  | HIS | A | 58 | 39.774 | -14.355 | 1.620   | 1.00 | -0.05 | C |
| ATOM | 463 | CG  | HIS | A | 58 | 38.738 | -13.269 | 1.433   | 1.00 | -0.03 | C |
| ATOM | 464 | CD2 | HIS | A | 58 | 37.999 | -13.019 | 0.307   | 1.00 | 0.13  | C |
| ATOM | 465 | ND1 | HIS | A | 58 | 38.443 | -12.268 | 2.328   | 1.00 | -0.38 | N |
| ATOM | 466 | CE1 | HIS | A | 58 | 37.540 | -11.453 | 1.762   | 1.00 | 0.21  | C |
| ATOM | 467 | NE2 | HIS | A | 58 | 37.249 | -11.853 | 0.515   | 1.00 | -0.57 | N |
| ATOM | 468 | N   | SER | A | 59 | 40.498 | -17.491 | 1.488   | 1.00 | -0.42 | N |
| ATOM | 469 | CA  | SER | A | 59 | 41.472 | -18.592 | 1.391   | 1.00 | -0.02 | C |
| ATOM | 470 | C   | SER | A | 59 | 42.935 | -18.124 | 1.215   | 1.00 | 0.60  | C |
| ATOM | 471 | O   | SER | A | 59 | 43.210 | -17.103 | 0.582   | 1.00 | -0.57 | O |
| ATOM | 472 | CB  | SER | A | 59 | 41.085 | -19.580 | 0.280   | 1.00 | 0.21  | C |
| ATOM | 473 | OG  | SER | A | 59 | 41.393 | -19.079 | -1.004  | 1.00 | -0.65 | O |
| ATOM | 474 | N   | ALA | A | 60 | 43.894 | -18.890 | 1.760   | 1.00 | -0.42 | N |
| ATOM | 475 | CA  | ALA | A | 60 | 45.329 | -18.595 | 1.654   | 1.00 | 0.03  | C |
| ATOM | 476 | C   | ALA | A | 60 | 45.837 | -18.648 | 0.198   | 1.00 | 0.60  | C |
| ATOM | 477 | O   | ALA | A | 60 | 46.519 | -17.726 | -0.256  | 1.00 | -0.57 | O |
| ATOM | 478 | CB  | ALA | A | 60 | 46.103 | -19.577 | 2.542   | 1.00 | -0.18 | C |
| ATOM | 479 | N   | GLU | A | 61 | 45.462 | -19.700 | -0.548  | 1.00 | -0.52 | N |
| ATOM | 480 | CA  | GLU | A | 61 | 45.831 | -19.892 | -1.965  | 1.00 | 0.04  | C |
| ATOM | 481 | C   | GLU | A | 61 | 45.469 | -18.686 | -2.834  | 1.00 | 0.54  | C |
| ATOM | 482 | O   | GLU | A | 61 | 46.280 | -18.246 | -3.649  | 1.00 | -0.58 | O |
| ATOM | 483 | CB  | GLU | A | 61 | 45.180 | -21.146 | -2.583  | 1.00 | 0.06  | C |
| ATOM | 484 | CG  | GLU | A | 61 | 44.948 | -22.350 | -1.663  | 1.00 | 0.01  | C |
| ATOM | 485 | CD  | GLU | A | 61 | 46.166 | -22.749 | -0.850  | 1.00 | 0.81  | C |
| ATOM | 486 | OE1 | GLU | A | 61 | 47.098 | -23.331 | -1.448  | 1.00 | -0.82 | O |
| ATOM | 487 | OE2 | GLU | A | 61 | 46.122 | -22.469 | 0.370   | 1.00 | -0.82 | O |
| ATOM | 488 | N   | TYR | A | 62 | 44.274 | -18.128 | -2.601  | 1.00 | -0.42 | N |
| ATOM | 489 | CA  | TYR | A | 62 | 43.746 | -16.950 | -3.290  | 1.00 | -0.00 | C |
| ATOM | 490 | C   | TYR | A | 62 | 44.640 | -15.715 | -3.119  | 1.00 | 0.60  | C |
| ATOM | 491 | O   | TYR | A | 62 | 45.103 | -15.145 | -4.117  | 1.00 | -0.57 | O |
| ATOM | 492 | CB  | TYR | A | 62 | 42.329 | -16.679 | -2.769  | 1.00 | -0.02 | C |
| ATOM | 493 | CG  | TYR | A | 62 | 41.681 | -15.425 | -3.301  | 1.00 | -0.00 | C |
| ATOM | 494 | CD1 | TYR | A | 62 | 41.485 | -15.320 | -4.683  | 1.00 | -0.19 | C |
| ATOM | 495 | CD2 | TYR | A | 62 | 41.262 | -14.388 | -2.442  | 1.00 | -0.19 | C |
| ATOM | 496 | CE1 | TYR | A | 62 | 40.873 | -14.185 | -5.227  | 1.00 | -0.23 | C |
| ATOM | 497 | CE2 | TYR | A | 62 | 40.652 | -13.243 | -2.988  | 1.00 | -0.23 | C |
| ATOM | 498 | CZ  | TYR | A | 62 | 40.468 | -13.149 | -4.380  | 1.00 | 0.32  | C |
| ATOM | 499 | OH  | TYR | A | 62 | 39.903 | -12.051 | -4.939  | 1.00 | -0.56 | O |
| ATOM | 500 | N   | VAL | A | 63 | 44.960 | -15.338 | -1.868  | 1.00 | -0.42 | N |
| ATOM | 501 | CA  | VAL | A | 63 | 45.939 | -14.258 | -1.637  | 1.00 | -0.09 | C |
| ATOM | 502 | C   | VAL | A | 63 | 47.318 | -14.624 | -2.182  | 1.00 | 0.60  | C |
| ATOM | 503 | O   | VAL | A | 63 | 47.935 | -13.790 | -2.842  | 1.00 | -0.57 | O |
| ATOM | 504 | CB  | VAL | A | 63 | 46.052 | -13.771 | -0.175  | 1.00 | 0.30  | C |
| ATOM | 505 | CG1 | VAL | A | 63 | 44.821 | -12.939 | 0.180   | 1.00 | -0.32 | C |
| ATOM | 506 | CG2 | VAL | A | 63 | 46.192 | -14.868 | 0.884   | 1.00 | -0.32 | C |
| ATOM | 507 | N   | GLY | A | 64 | 47.787 | -15.865 | -1.992  | 1.00 | -0.42 | N |
| ATOM | 508 | CA  | GLY | A | 64 | 49.079 | -16.322 | -2.513  | 1.00 | -0.03 | C |
| ATOM | 509 | C   | GLY | A | 64 | 49.218 | -16.109 | -4.019  | 1.00 | 0.60  | C |
| ATOM | 510 | O   | GLY | A | 64 | 50.155 | -15.445 | -4.473  | 1.00 | -0.57 | O |
| ATOM | 511 | N   | HIS | A | 65 | 48.243 | -16.613 | -4.780  | 1.00 | -0.42 | N |
| ATOM | 512 | CA  | HIS | A | 65 | 48.179 | -16.422 | -6.222  | 1.00 | -0.06 | C |
| ATOM | 513 | C   | HIS | A | 65 | 48.117 | -14.939 | -6.622  | 1.00 | 0.60  | C |
| ATOM | 514 | O   | HIS | A | 65 | 48.876 | -14.534 | -7.507  | 1.00 | -0.57 | O |
| ATOM | 515 | CB  | HIS | A | 65 | 46.981 | -17.184 | -6.800  | 1.00 | -0.01 | C |
| ATOM | 516 | CG  | HIS | A | 65 | 46.720 | -16.804 | -8.237  | 1.00 | 0.19  | C |
| ATOM | 517 | CD2 | HIS | A | 65 | 45.824 | -15.854 | -8.644  | 1.00 | -0.22 | C |
| ATOM | 518 | ND1 | HIS | A | 65 | 47.434 | -17.278 | -9.342  | 1.00 | -0.54 | N |
| ATOM | 519 | CE1 | HIS | A | 65 | 46.937 | -16.604 | -10.390 | 1.00 | 0.16  | C |
| ATOM | 520 | NE2 | HIS | A | 65 | 45.974 | -15.750 | -10.004 | 1.00 | -0.28 | N |
| ATOM | 521 | N   | LEU | A | 66 | 47.237 | -14.128 | -6.015  | 1.00 | -0.42 | N |
| ATOM | 522 | CA  | LEU | A | 66 | 47.112 | -12.706 | -6.372  | 1.00 | -0.05 | C |
| ATOM | 523 | C   | LEU | A | 66 | 48.426 | -11.948 | -6.092  | 1.00 | 0.60  | C |
| ATOM | 524 | O   | LEU | A | 66 | 48.931 | -11.220 | -6.954  | 1.00 | -0.57 | O |
| ATOM | 525 | CB  | LEU | A | 66 | 45.916 | -12.099 | -5.610  | 1.00 | -0.11 | C |
| ATOM | 526 | CG  | LEU | A | 66 | 45.470 | -10.700 | -6.093  | 1.00 | 0.35  | C |
| ATOM | 527 | CD1 | LEU | A | 66 | 44.845 | -10.723 | -7.489  | 1.00 | -0.41 | C |
| ATOM | 528 | CD2 | LEU | A | 66 | 44.403 | -10.157 | -5.136  | 1.00 | -0.41 | C |
| ATOM | 529 | N   | ARG | A | 67 | 49.024 | -12.193 | -4.919  | 1.00 | -0.35 | N |
| ATOM | 530 | CA  | ARG | A | 67 | 50.329 | -11.672 | -4.504  | 1.00 | -0.26 | C |
| ATOM | 531 | C   | ARG | A | 67 | 51.433 | -12.071 | -5.506  | 1.00 | 0.73  | C |
| ATOM | 532 | O   | ARG | A | 67 | 52.185 | -11.221 | -5.980  | 1.00 | -0.59 | O |
| ATOM | 533 | CB  | ARG | A | 67 | 50.581 | -12.194 | -3.077  | 1.00 | -0.00 | C |
| ATOM | 534 | CG  | ARG | A | 67 | 51.798 | -11.606 | -2.356  | 1.00 | 0.04  | C |
| ATOM | 535 | CD  | ARG | A | 67 | 51.861 | -12.126 | -0.906  | 1.00 | 0.05  | C |
| ATOM | 536 | NE  | ARG | A | 67 | 52.344 | -13.519 | -0.858  | 1.00 | -0.53 | N |
| ATOM | 537 | CZ  | ARG | A | 67 | 51.725 | -14.603 | -0.392  | 1.00 | 0.81  | C |



|      |     |     |     |   |    |        |         |         |      |       |   |
|------|-----|-----|-----|---|----|--------|---------|---------|------|-------|---|
| ATOM | 538 | NH1 | ARG | A | 67 | 52.314 | -15.775 | -0.526  | 1.00 | -0.86 | N |
| ATOM | 539 | NH2 | ARG | A | 67 | 50.550 | -14.598 | 0.205   | 1.00 | -0.86 | N |
| ATOM | 540 | N   | ALA | A | 68 | 51.470 | -13.347 | -5.913  | 1.00 | -0.42 | N |
| ATOM | 541 | CA  | ALA | A | 68 | 52.368 | -13.864 | -6.945  | 1.00 | 0.03  | C |
| ATOM | 542 | C   | ALA | A | 68 | 52.067 | -13.363 | -8.378  | 1.00 | 0.60  | C |
| ATOM | 543 | O   | ALA | A | 68 | 52.845 | -13.676 | -9.294  | 1.00 | -0.57 | O |
| ATOM | 544 | CB  | ALA | A | 68 | 52.325 | -15.396 | -6.890  | 1.00 | -0.18 | C |
| ATOM | 545 | N   | THR | A | 69 | 50.986 | -12.615 | -8.614  | 1.00 | -0.42 | N |
| ATOM | 546 | CA  | THR | A | 69 | 50.512 | -12.237 | -9.958  | 1.00 | -0.04 | C |
| ATOM | 547 | C   | THR | A | 69 | 50.717 | -10.753 | -10.285 | 1.00 | 0.60  | C |
| ATOM | 548 | O   | THR | A | 69 | 51.084 | -10.458 | -11.424 | 1.00 | -0.57 | C |
| ATOM | 549 | CB  | THR | A | 69 | 49.061 | -12.703 | -10.202 | 1.00 | 0.37  | O |
| ATOM | 550 | CG2 | THR | A | 69 | 48.565 | -12.443 | -11.629 | 1.00 | -0.24 | C |
| ATOM | 551 | OG1 | THR | A | 69 | 48.992 | -14.098 | -10.018 | 1.00 | -0.68 | O |
| ATOM | 552 | N   | GLU | A | 70 | 50.603 | -9.842  | -9.300  | 1.00 | -0.52 | N |
| ATOM | 553 | CA  | GLU | A | 70 | 50.780 | -8.376  | -9.473  | 1.00 | 0.04  | C |
| ATOM | 554 | C   | GLU | A | 70 | 52.200 | -7.899  | -9.846  | 1.00 | 0.54  | C |
| ATOM | 555 | O   | GLU | A | 70 | 52.416 | -6.705  | -10.029 | 1.00 | -0.58 | O |
| ATOM | 556 | CB  | GLU | A | 70 | 50.230 | -7.589  | -8.258  | 1.00 | 0.06  | C |
| ATOM | 557 | CG  | GLU | A | 70 | 51.154 | -7.535  | -7.033  | 1.00 | 0.01  | C |
| ATOM | 558 | CD  | GLU | A | 70 | 50.524 | -6.804  | -5.846  | 1.00 | 0.81  | C |
| ATOM | 559 | OE1 | GLU | A | 70 | 50.857 | -7.184  | -4.707  | 1.00 | -0.82 | O |
| ATOM | 560 | OE2 | GLU | A | 70 | 49.687 | -5.889  | -6.031  | 1.00 | -0.82 | O |
| ATOM | 561 | N   | LYS | A | 71 | 53.172 | -8.811  | -9.978  | 1.00 | -0.35 | N |
| ATOM | 562 | CA  | LYS | A | 71 | 54.607 | -8.588  | -10.251 | 1.00 | -0.24 | C |
| ATOM | 563 | C   | LYS | A | 71 | 54.936 | -7.990  | -11.655 | 1.00 | 0.73  | C |
| ATOM | 564 | O   | LYS | A | 71 | 55.874 | -8.428  | -12.323 | 1.00 | -0.59 | O |
| ATOM | 565 | CB  | LYS | A | 71 | 55.345 | -9.923  | -9.982  | 1.00 | -0.01 | C |
| ATOM | 566 | CG  | LYS | A | 71 | 56.852 | -9.750  | -9.705  | 1.00 | 0.02  | C |
| ATOM | 567 | CD  | LYS | A | 71 | 57.570 | -11.102 | -9.567  | 1.00 | -0.05 | C |
| ATOM | 568 | CE  | LYS | A | 71 | 59.082 | -10.866 | -9.453  | 1.00 | -0.01 | C |
| ATOM | 569 | NZ  | LYS | A | 71 | 59.845 | -12.125 | -9.325  | 1.00 | -0.39 | N |
| ATOM | 570 | N   | MET | A | 72 | 54.148 | -7.018  | -12.133 | 1.00 | -0.42 | N |
| ATOM | 571 | CA  | MET | A | 72 | 54.212 | -6.317  | -13.436 | 1.00 | -0.02 | C |
| ATOM | 572 | C   | MET | A | 72 | 54.192 | -7.191  | -14.715 | 1.00 | 0.60  | C |
| ATOM | 573 | O   | MET | A | 72 | 53.995 | -6.681  | -15.814 | 1.00 | -0.57 | O |
| ATOM | 574 | CB  | MET | A | 72 | 55.385 | -5.314  | -13.428 | 1.00 | 0.03  | C |
| ATOM | 575 | CG  | MET | A | 72 | 55.216 | -4.141  | -14.407 | 1.00 | 0.00  | C |
| ATOM | 576 | SD  | MET | A | 72 | 53.778 | -3.083  | -14.075 | 1.00 | -0.27 | S |
| ATOM | 577 | CE  | MET | A | 72 | 53.949 | -1.845  | -15.385 | 1.00 | -0.05 | C |
| ATOM | 578 | N   | LYS | A | 73 | 54.347 | -8.512  | -14.599 | 1.00 | -0.35 | N |
| ATOM | 579 | CA  | LYS | A | 73 | 54.201 | -9.485  | -15.679 | 1.00 | -0.24 | C |
| ATOM | 580 | C   | LYS | A | 73 | 52.859 | -9.341  | -16.434 | 1.00 | 0.73  | C |
| ATOM | 581 | O   | LYS | A | 73 | 51.774 | -9.499  | -15.865 | 1.00 | -0.59 | O |
| ATOM | 582 | CB  | LYS | A | 73 | 54.450 | -10.906 | -15.124 | 1.00 | -0.01 | C |
| ATOM | 583 | CG  | LYS | A | 73 | 53.339 | -11.435 | -14.201 | 1.00 | 0.02  | C |
| ATOM | 584 | CD  | LYS | A | 73 | 53.710 | -12.729 | -13.467 | 1.00 | -0.05 | C |
| ATOM | 585 | CE  | LYS | A | 73 | 52.420 | -13.290 | -12.860 | 1.00 | -0.01 | C |
| ATOM | 586 | NZ  | LYS | A | 73 | 52.655 | -14.392 | -11.907 | 1.00 | -0.39 | N |
| ATOM | 587 | N   | THR | A | 74 | 52.950 | -9.067  | -17.739 | 1.00 | -0.42 | N |
| ATOM | 588 | CA  | THR | A | 74 | 51.836 | -9.097  | -18.695 | 1.00 | -0.04 | C |
| ATOM | 589 | C   | THR | A | 74 | 51.011 | -10.382 | -18.543 | 1.00 | 0.60  | C |
| ATOM | 590 | O   | THR | A | 74 | 51.563 | -11.438 | -18.222 | 1.00 | -0.57 | O |
| ATOM | 591 | CB  | THR | A | 74 | 52.395 | -8.998  | -20.129 | 1.00 | 0.37  | C |
| ATOM | 592 | CG2 | THR | A | 74 | 51.340 | -8.613  | -21.168 | 1.00 | -0.24 | C |
| ATOM | 593 | OG1 | THR | A | 74 | 53.423 | -8.030  | -20.188 | 1.00 | -0.68 | O |
| ATOM | 594 | N   | ARG | A | 75 | 49.689 | -10.302 | -18.751 | 1.00 | -0.35 | N |
| ATOM | 595 | CA  | ARG | A | 75 | 48.768 | -11.439 | -18.642 | 1.00 | -0.26 | C |
| ATOM | 596 | C   | ARG | A | 75 | 47.889 | -11.603 | -19.891 | 1.00 | 0.73  | C |
| ATOM | 597 | O   | ARG | A | 75 | 46.661 | -11.552 | -19.826 | 1.00 | -0.59 | O |
| ATOM | 598 | CB  | ARG | A | 75 | 47.939 | -11.402 | -17.341 | 1.00 | -0.00 | C |
| ATOM | 599 | CG  | ARG | A | 75 | 48.706 | -11.466 | -16.005 | 1.00 | 0.04  | C |
| ATOM | 600 | CD  | ARG | A | 75 | 49.780 | -12.556 | -15.842 | 1.00 | 0.05  | C |
| ATOM | 601 | NE  | ARG | A | 75 | 49.486 | -13.809 | -16.570 | 1.00 | -0.53 | N |
| ATOM | 602 | CZ  | ARG | A | 75 | 50.314 | -14.484 | -17.369 | 1.00 | 0.81  | C |
| ATOM | 603 | NH1 | ARG | A | 75 | 49.929 | -15.601 | -17.936 | 1.00 | -0.86 | N |
| ATOM | 604 | NH2 | ARG | A | 75 | 51.526 | -14.081 | -17.666 | 1.00 | -0.86 | N |
| ATOM | 605 | N   | GLU | A | 76 | 48.543 | -11.853 | -21.029 | 1.00 | -0.52 | N |
| ATOM | 606 | CA  | GLU | A | 76 | 47.933 | -12.258 | -22.312 | 1.00 | 0.04  | C |
| ATOM | 607 | C   | GLU | A | 76 | 47.086 | -13.538 | -22.232 | 1.00 | 0.54  | C |
| ATOM | 608 | O   | GLU | A | 76 | 46.235 | -13.749 | -23.092 | 1.00 | -0.58 | O |
| ATOM | 609 | CB  | GLU | A | 76 | 48.988 | -12.400 | -23.430 | 1.00 | 0.06  | C |
| ATOM | 610 | CG  | GLU | A | 76 | 50.277 | -13.121 | -23.033 | 1.00 | 0.01  | C |
| ATOM | 611 | CD  | GLU | A | 76 | 51.271 | -12.162 | -22.395 | 1.00 | 0.81  | C |
| ATOM | 612 | OE1 | GLU | A | 76 | 52.022 | -11.525 | -23.170 | 1.00 | -0.82 | O |
| ATOM | 613 | OE2 | GLU | A | 76 | 51.252 | -12.075 | -21.147 | 1.00 | -0.82 | O |
| ATOM | 614 | N   | LEU | A | 77 | 47.277 | -14.372 | -21.197 | 1.00 | -0.42 | N |

|      |     |     |     |   |    |        |         |         |      |       |   |
|------|-----|-----|-----|---|----|--------|---------|---------|------|-------|---|
| ATOM | 615 | CA  | LEU | A | 77 | 46.437 | -15.541 | -20.915 | 1.00 | -0.05 | C |
| ATOM | 616 | C   | LEU | A | 77 | 46.345 | -15.844 | -19.402 | 1.00 | 0.60  | C |
| ATOM | 617 | O   | LEU | A | 77 | 47.349 | -15.884 | -18.685 | 1.00 | -0.57 | O |
| ATOM | 618 | CB  | LEU | A | 77 | 46.978 | -16.740 | -21.717 | 1.00 | -0.11 | C |
| ATOM | 619 | CG  | LEU | A | 77 | 46.016 | -17.941 | -21.793 | 1.00 | 0.35  | C |
| ATOM | 620 | CD1 | LEU | A | 77 | 44.701 | -17.608 | -22.509 | 1.00 | -0.41 | C |
| ATOM | 621 | CD2 | LEU | A | 77 | 46.687 | -19.093 | -22.547 | 1.00 | -0.41 | C |
| ATOM | 622 | N   | HIS | A | 78 | 45.121 | -16.076 | -18.909 | 1.00 | -0.42 | N |
| ATOM | 623 | CA  | HIS | A | 78 | 44.762 | -16.064 | -17.483 | 1.00 | -0.06 | C |
| ATOM | 624 | C   | HIS | A | 78 | 44.878 | -17.454 | -16.792 | 1.00 | 0.60  | C |
| ATOM | 625 | O   | HIS | A | 78 | 44.063 | -17.777 | -15.927 | 1.00 | -0.57 | O |
| ATOM | 626 | CB  | HIS | A | 78 | 43.368 | -15.394 | -17.346 | 1.00 | -0.01 | C |
| ATOM | 627 | CG  | HIS | A | 78 | 43.382 | -13.876 | -17.313 | 1.00 | 0.19  | C |
| ATOM | 628 | CD2 | HIS | A | 78 | 44.096 | -13.036 | -18.124 | 1.00 | -0.22 | C |
| ATOM | 629 | ND1 | HIS | A | 78 | 42.647 | -13.098 | -16.413 | 1.00 | -0.54 | N |
| ATOM | 630 | CE1 | HIS | A | 78 | 42.942 | -11.821 | -16.692 | 1.00 | 0.16  | C |
| ATOM | 631 | NE2 | HIS | A | 78 | 43.803 | -11.753 | -17.721 | 1.00 | -0.28 | N |
| ATOM | 632 | N   | ARG | A | 79 | 45.893 | -18.263 | -17.143 | 1.00 | -0.35 | N |
| ATOM | 633 | CA  | ARG | A | 79 | 46.102 | -19.673 | -16.741 | 1.00 | -0.26 | C |
| ATOM | 634 | C   | ARG | A | 79 | 45.641 | -20.056 | -15.317 | 1.00 | 0.73  | C |
| ATOM | 635 | O   | ARG | A | 79 | 44.917 | -21.038 | -15.188 | 1.00 | -0.59 | O |
| ATOM | 636 | CB  | ARG | A | 79 | 47.580 | -20.029 | -17.006 | 1.00 | -0.00 | C |
| ATOM | 637 | CG  | ARG | A | 79 | 48.084 | -21.433 | -16.605 | 1.00 | 0.04  | C |
| ATOM | 638 | CD  | ARG | A | 79 | 47.203 | -22.612 | -17.057 | 1.00 | 0.05  | C |
| ATOM | 639 | NE  | ARG | A | 79 | 47.994 | -23.822 | -17.368 | 1.00 | -0.53 | N |
| ATOM | 640 | CZ  | ARG | A | 79 | 48.359 | -24.801 | -16.542 | 1.00 | 0.81  | C |
| ATOM | 641 | NH1 | ARG | A | 79 | 48.984 | -25.852 | -17.030 | 1.00 | -0.86 | N |
| ATOM | 642 | NH2 | ARG | A | 79 | 48.141 | -24.795 | -15.249 | 1.00 | -0.86 | N |
| ATOM | 643 | N   | GLU | A | 80 | 45.983 | -19.261 | -14.285 | 1.00 | -0.52 | N |
| ATOM | 644 | CA  | GLU | A | 80 | 45.490 | -19.446 | -12.897 | 1.00 | 0.04  | C |
| ATOM | 645 | C   | GLU | A | 80 | 44.716 | -18.244 | -12.342 | 1.00 | 0.54  | O |
| ATOM | 646 | O   | GLU | A | 80 | 44.260 | -18.265 | -11.203 | 1.00 | -0.58 | O |
| ATOM | 647 | CB  | GLU | A | 80 | 46.635 | -19.813 | -11.937 | 1.00 | 0.06  | C |
| ATOM | 648 | CG  | GLU | A | 80 | 47.509 | -20.986 | -12.392 | 1.00 | 0.01  | C |
| ATOM | 649 | CD  | GLU | A | 80 | 46.713 | -22.243 | -12.717 | 1.00 | 0.81  | C |
| ATOM | 650 | OE1 | GLU | A | 80 | 45.765 | -22.552 | -11.960 | 1.00 | -0.82 | O |
| ATOM | 651 | OE2 | GLU | A | 80 | 47.083 | -22.896 | -13.722 | 1.00 | -0.82 | O |
| ATOM | 652 | N   | SER | A | 81 | 44.540 | -17.210 | -13.172 | 1.00 | -0.42 | N |
| ATOM | 653 | CA  | SER | A | 81 | 43.745 | -16.033 | -12.830 | 1.00 | -0.02 | C |
| ATOM | 654 | C   | SER | A | 81 | 42.275 | -16.446 | -12.735 | 1.00 | 0.60  | C |
| ATOM | 655 | O   | SER | A | 81 | 41.644 | -16.280 | -11.689 | 1.00 | -0.57 | O |
| ATOM | 656 | CB  | SER | A | 81 | 43.952 | -14.940 | -13.894 | 1.00 | 0.21  | C |
| ATOM | 657 | OG  | SER | A | 81 | 44.759 | -13.883 | -13.414 | 1.00 | -0.65 | O |
| ATOM | 658 | N   | SER | A | 82 | 41.730 | -17.073 | -13.782 | 1.00 | -0.42 | N |
| ATOM | 659 | CA  | SER | A | 82 | 40.303 | -17.410 | -13.798 | 1.00 | -0.02 | C |
| ATOM | 660 | C   | SER | A | 82 | 39.946 | -18.595 | -12.889 | 1.00 | 0.60  | C |
| ATOM | 661 | O   | SER | A | 82 | 38.797 | -18.708 | -12.472 | 1.00 | -0.57 | O |
| ATOM | 662 | CB  | SER | A | 82 | 39.827 | -17.581 | -15.238 | 1.00 | 0.21  | C |
| ATOM | 663 | OG  | SER | A | 82 | 40.176 | -16.414 | -15.970 | 1.00 | -0.65 | O |
| ATOM | 664 | N   | ASN | A | 83 | 40.939 | -19.398 | -12.478 | 1.00 | -0.42 | N |
| ATOM | 665 | CA  | ASN | A | 83 | 40.808 | -20.384 | -11.396 | 1.00 | 0.01  | C |
| ATOM | 666 | C   | ASN | A | 83 | 40.568 | -19.746 | -10.001 | 1.00 | 0.60  | C |
| ATOM | 667 | O   | ASN | A | 83 | 40.292 | -20.466 | -9.046  | 1.00 | -0.57 | O |
| ATOM | 668 | CB  | ASN | A | 83 | 42.041 | -21.312 | -11.412 | 1.00 | -0.20 | C |
| ATOM | 669 | CG  | ASN | A | 83 | 42.106 | -22.213 | -12.646 | 1.00 | 0.71  | C |
| ATOM | 670 | ND2 | ASN | A | 83 | 43.250 | -22.805 | -12.936 | 1.00 | -0.92 | N |
| ATOM | 671 | OD1 | ASN | A | 83 | 41.137 | -22.393 | -13.374 | 1.00 | -0.59 | O |
| ATOM | 672 | N   | PHE | A | 84 | 40.648 | -18.411 | -9.904  | 1.00 | -0.42 | N |
| ATOM | 673 | CA  | PHE | A | 84 | 40.296 | -17.568 | -8.757  | 1.00 | -0.00 | C |
| ATOM | 674 | C   | PHE | A | 84 | 39.408 | -16.370 | -9.199  | 1.00 | 0.60  | C |
| ATOM | 675 | O   | PHE | A | 84 | 39.425 | -15.289 | -8.594  | 1.00 | -0.57 | O |
| ATOM | 676 | CB  | PHE | A | 84 | 41.600 | -17.103 | -8.088  | 1.00 | -0.03 | C |
| ATOM | 677 | CG  | PHE | A | 84 | 42.448 | -18.193 | -7.442  | 1.00 | 0.01  | C |
| ATOM | 678 | CD1 | PHE | A | 84 | 42.011 | -18.861 | -6.284  | 1.00 | -0.13 | C |
| ATOM | 679 | CD2 | PHE | A | 84 | 43.700 | -18.529 | -7.986  | 1.00 | -0.13 | C |
| ATOM | 680 | CE1 | PHE | A | 84 | 42.816 | -19.835 | -5.669  | 1.00 | -0.17 | C |
| ATOM | 681 | CE2 | PHE | A | 84 | 44.503 | -19.517 | -7.389  | 1.00 | -0.17 | C |
| ATOM | 682 | CZ  | PHE | A | 84 | 44.064 | -20.166 | -6.222  | 1.00 | -0.11 | C |
| ATOM | 683 | N   | ASP | A | 85 | 38.673 | -16.545 | -10.314 | 1.00 | -0.52 | N |
| ATOM | 684 | CA  | ASP | A | 85 | 37.802 | -15.558 | -10.986 | 1.00 | 0.04  | C |
| ATOM | 685 | C   | ASP | A | 85 | 38.437 | -14.190 | -11.336 | 1.00 | 0.54  | C |
| ATOM | 686 | O   | ASP | A | 85 | 37.739 | -13.207 | -11.591 | 1.00 | -0.58 | O |
| ATOM | 687 | CB  | ASP | A | 85 | 36.457 | -15.454 | -10.235 | 1.00 | -0.03 | C |
| ATOM | 688 | CG  | ASP | A | 85 | 35.633 | -16.750 | -10.307 | 1.00 | 0.80  | C |
| ATOM | 689 | OD1 | ASP | A | 85 | 35.109 | -17.038 | -11.411 | 1.00 | -0.80 | O |
| ATOM | 690 | OD2 | ASP | A | 85 | 35.539 | -17.450 | -9.271  | 1.00 | -0.80 | O |
| ATOM | 691 | N   | SER | A | 86 | 39.771 | -14.129 | -11.452 | 1.00 | -0.42 | N |

|      |     |     |     |   |    |        |         |         |      |       |   |
|------|-----|-----|-----|---|----|--------|---------|---------|------|-------|---|
| ATOM | 692 | CA  | SER | A | 86 | 40.446 | -13.055 | -12.194 | 1.00 | -0.02 | C |
| ATOM | 693 | C   | SER | A | 86 | 40.179 | -13.248 | -13.706 | 1.00 | 0.60  | C |
| ATOM | 694 | O   | SER | A | 86 | 40.290 | -14.347 | -14.260 | 1.00 | -0.57 | O |
| ATOM | 695 | CB  | SER | A | 86 | 41.935 | -12.967 | -11.807 | 1.00 | 0.21  | C |
| ATOM | 696 | OG  | SER | A | 86 | 42.734 | -12.182 | -12.684 | 1.00 | -0.65 | O |
| ATOM | 697 | N   | ILE | A | 87 | 39.739 | -12.169 | -14.357 | 1.00 | -0.42 | N |
| ATOM | 698 | CA  | ILE | A | 87 | 39.114 | -12.135 | -15.695 | 1.00 | -0.06 | C |
| ATOM | 699 | C   | ILE | A | 87 | 38.945 | -10.656 | -16.118 | 1.00 | 0.60  | C |
| ATOM | 700 | O   | ILE | A | 87 | 39.276 | -9.775  | -15.327 | 1.00 | -0.57 | O |
| ATOM | 701 | CB  | ILE | A | 87 | 37.758 | -12.905 | -15.644 | 1.00 | 0.13  | C |
| ATOM | 702 | CG1 | ILE | A | 87 | 37.115 | -13.247 | -17.007 | 1.00 | -0.04 | C |
| ATOM | 703 | CG2 | ILE | A | 87 | 36.713 | -12.174 | -14.783 | 1.00 | -0.32 | C |
| ATOM | 704 | CD1 | ILE | A | 87 | 38.047 | -13.986 | -17.975 | 1.00 | -0.07 | C |
| ATOM | 705 | N   | TYR | A | 88 | 38.389 | -10.342 | -17.301 | 1.00 | -0.42 | N |
| ATOM | 706 | CA  | TYR | A | 88 | 38.119 | -8.948  | -17.706 | 1.00 | -0.00 | C |
| ATOM | 707 | C   | TYR | A | 88 | 37.560 | -8.067  | -16.561 | 1.00 | 0.60  | C |
| ATOM | 708 | O   | TYR | A | 88 | 38.187 | -7.072  | -16.206 | 1.00 | -0.57 | O |
| ATOM | 709 | CB  | TYR | A | 88 | 37.206 | -8.887  | -18.952 | 1.00 | -0.02 | C |
| ATOM | 710 | CG  | TYR | A | 88 | 36.511 | -7.539  | -19.068 | 1.00 | -0.00 | C |
| ATOM | 711 | CD1 | TYR | A | 88 | 37.286 | -6.362  | -19.071 | 1.00 | -0.19 | C |
| ATOM | 712 | CD2 | TYR | A | 88 | 35.107 | -7.452  | -18.963 | 1.00 | -0.19 | C |
| ATOM | 713 | CE1 | TYR | A | 88 | 36.680 | -5.120  | -18.820 | 1.00 | -0.23 | C |
| ATOM | 714 | CE2 | TYR | A | 88 | 34.500 | -6.197  | -18.753 | 1.00 | -0.23 | C |
| ATOM | 715 | CZ  | TYR | A | 88 | 35.294 | -5.046  | -18.620 | 1.00 | 0.32  | C |
| ATOM | 716 | OH  | TYR | A | 88 | 34.728 | -3.870  | -18.241 | 1.00 | -0.56 | O |
| ATOM | 717 | N   | ILE | A | 89 | 36.437 | -8.450  | -15.932 | 1.00 | -0.42 | N |
| ATOM | 718 | CA  | ILE | A | 89 | 35.807 | -7.663  | -14.846 | 1.00 | -0.06 | C |
| ATOM | 719 | C   | ILE | A | 89 | 36.606 | -7.604  | -13.525 | 1.00 | 0.60  | C |
| ATOM | 720 | O   | ILE | A | 89 | 36.156 | -6.964  | -12.576 | 1.00 | -0.57 | O |
| ATOM | 721 | CB  | ILE | A | 89 | 34.356 | -8.128  | -14.569 | 1.00 | 0.13  | C |
| ATOM | 722 | CG1 | ILE | A | 89 | 34.267 | -9.591  | -14.079 | 1.00 | -0.04 | C |
| ATOM | 723 | CG2 | ILE | A | 89 | 33.479 | -7.892  | -15.807 | 1.00 | -0.32 | C |
| ATOM | 724 | CD1 | ILE | A | 89 | 32.911 | -9.943  | -13.456 | 1.00 | -0.07 | C |
| ATOM | 725 | N   | CYS | A | 90 | 37.761 | -8.272  | -13.451 | 1.00 | -0.42 | N |
| ATOM | 726 | CA  | CYS | A | 90 | 38.627 | -8.396  | -12.279 | 1.00 | 0.02  | C |
| ATOM | 727 | C   | CYS | A | 90 | 40.068 | -8.727  | -12.731 | 1.00 | 0.60  | C |
| ATOM | 728 | O   | CYS | A | 90 | 40.404 | -9.911  | -12.748 | 1.00 | -0.57 | O |
| ATOM | 729 | CB  | CYS | A | 90 | 38.111 | -9.538  | -11.376 | 1.00 | -0.12 | C |
| ATOM | 730 | SG  | CYS | A | 90 | 36.616 | -9.092  | -10.452 | 1.00 | -0.31 | S |
| ATOM | 731 | N   | PRO | A | 91 | 40.926 | -7.753  | -13.116 | 1.00 | -0.25 | N |
| ATOM | 732 | CA  | PRO | A | 91 | 42.326 | -8.007  | -13.494 | 1.00 | -0.03 | C |
| ATOM | 733 | C   | PRO | A | 91 | 43.176 | -8.534  | -12.310 | 1.00 | 0.59  | C |
| ATOM | 734 | O   | PRO | A | 91 | 42.952 | -9.659  | -11.860 | 1.00 | -0.57 | O |
| ATOM | 735 | CB  | PRO | A | 91 | 42.795 | -6.717  | -14.188 | 1.00 | -0.01 | C |
| ATOM | 736 | CG  | PRO | A | 91 | 41.874 | -5.625  | -13.645 | 1.00 | 0.02  | C |
| ATOM | 737 | CD  | PRO | A | 91 | 40.569 | -6.358  | -13.328 | 1.00 | 0.02  | C |
| ATOM | 738 | N   | SER | A | 92 | 44.152 | -7.780  | -11.781 | 1.00 | -0.42 | N |
| ATOM | 739 | CA  | SER | A | 92 | 44.934 | -8.225  | -10.610 | 1.00 | -0.02 | C |
| ATOM | 740 | C   | SER | A | 92 | 45.761 | -7.122  | -9.932  | 1.00 | 0.60  | C |
| ATOM | 741 | O   | SER | A | 92 | 46.609 | -6.515  | -10.589 | 1.00 | -0.57 | O |
| ATOM | 742 | CB  | SER | A | 92 | 45.930 | -9.326  | -11.019 | 1.00 | 0.21  | C |
| ATOM | 743 | OG  | SER | A | 92 | 46.895 | -8.805  | -11.916 | 1.00 | -0.65 | O |
| ATOM | 744 | N   | THR | A | 93 | 45.595 | -6.960  | -8.615  | 1.00 | -0.42 | N |
| ATOM | 745 | CA  | THR | A | 93 | 46.471 | -6.203  | -7.697  | 1.00 | -0.04 | C |
| ATOM | 746 | C   | THR | A | 93 | 46.190 | -6.663  | -6.253  | 1.00 | 0.60  | C |
| ATOM | 747 | O   | THR | A | 93 | 45.034 | -6.860  | -5.868  | 1.00 | -0.57 | O |
| ATOM | 748 | CB  | THR | A | 93 | 46.220 | -4.679  | -7.766  | 1.00 | 0.37  | C |
| ATOM | 749 | CG2 | THR | A | 93 | 46.937 | -3.969  | -8.915  | 1.00 | -0.24 | C |
| ATOM | 750 | OG1 | THR | A | 93 | 44.835 | -4.465  | -7.904  | 1.00 | -0.68 | O |
| ATOM | 751 | N   | PHE | A | 94 | 47.219 | -6.833  | -5.426  | 1.00 | -0.42 | N |
| ATOM | 752 | CA  | PHE | A | 94 | 47.087 | -7.381  | -4.062  | 1.00 | -0.00 | C |
| ATOM | 753 | C   | PHE | A | 94 | 47.732 | -6.431  | -3.004  | 1.00 | 0.60  | C |
| ATOM | 754 | O   | PHE | A | 94 | 47.268 | -6.416  | -1.862  | 1.00 | -0.57 | O |
| ATOM | 755 | CB  | PHE | A | 94 | 47.908 | -8.704  | -3.975  | 1.00 | -0.03 | C |
| ATOM | 756 | CG  | PHE | A | 94 | 48.309 | -9.159  | -2.577  | 1.00 | 0.01  | C |
| ATOM | 757 | CD1 | PHE | A | 94 | 47.422 | -9.955  | -1.829  | 1.00 | -0.13 | C |
| ATOM | 758 | CD2 | PHE | A | 94 | 49.538 | -8.771  | -2.004  | 1.00 | -0.13 | C |
| ATOM | 759 | CE1 | PHE | A | 94 | 47.758 | -10.352 | -0.525  | 1.00 | -0.17 | C |
| ATOM | 760 | CE2 | PHE | A | 94 | 49.864 | -9.157  | -0.692  | 1.00 | -0.17 | C |
| ATOM | 761 | CZ  | PHE | A | 94 | 48.976 | -9.953  | 0.049   | 1.00 | -0.11 | C |
| ATOM | 762 | N   | ALA | A | 95 | 48.626 | -5.525  | -3.421  | 1.00 | -0.42 | N |
| ATOM | 763 | CA  | ALA | A | 95 | 48.746 | -4.235  | -2.745  | 1.00 | 0.03  | C |
| ATOM | 764 | C   | ALA | A | 95 | 47.337 | -3.629  | -2.546  | 1.00 | 0.60  | C |
| ATOM | 765 | O   | ALA | A | 95 | 46.997 | -3.171  | -1.456  | 1.00 | -0.57 | O |
| ATOM | 766 | CB  | ALA | A | 95 | 49.665 | -3.329  | -3.569  | 1.00 | -0.18 | C |
| ATOM | 767 | N   | CYS | A | 96 | 46.467 | -3.770  | -3.558  | 1.00 | -0.42 | N |
| ATOM | 768 | CA  | CYS | A | 96 | 45.033 | -3.471  | -3.477  | 1.00 | 0.02  | C |

|      |     |     |     |   |     |        |        |        |      |       |   |
|------|-----|-----|-----|---|-----|--------|--------|--------|------|-------|---|
| ATOM | 769 | C   | CYS | A | 96  | 44.262 | -4.299 | -2.416 | 1.00 | 0.60  | C |
| ATOM | 770 | O   | CYS | A | 96  | 43.464 | -3.718 | -1.687 | 1.00 | -0.57 | O |
| ATOM | 771 | CB  | CYS | A | 96  | 44.446 | -3.660 | -4.879 | 1.00 | -0.12 | C |
| ATOM | 772 | SG  | CYS | A | 96  | 42.833 | -2.868 | -5.100 | 1.00 | -0.31 | S |
| ATOM | 773 | N   | ALA | A | 97  | 44.490 | -5.613 | -2.263 | 1.00 | -0.42 | N |
| ATOM | 774 | CA  | ALA | A | 97  | 43.834 | -6.415 | -1.215 | 1.00 | 0.03  | C |
| ATOM | 775 | C   | ALA | A | 97  | 44.347 | -6.061 | 0.202  | 1.00 | 0.60  | C |
| ATOM | 776 | O   | ALA | A | 97  | 43.562 | -5.778 | 1.115  | 1.00 | -0.57 | O |
| ATOM | 777 | CB  | ALA | A | 97  | 44.048 | -7.903 | -1.522 | 1.00 | -0.18 | C |
| ATOM | 778 | N   | GLN | A | 98  | 45.675 | -6.008 | 0.349  | 1.00 | -0.42 | N |
| ATOM | 779 | CA  | GLN | A | 98  | 46.407 | -5.598 | 1.543  | 1.00 | -0.00 | C |
| ATOM | 780 | C   | GLN | A | 98  | 46.029 | -4.179 | 2.013  | 1.00 | 0.60  | C |
| ATOM | 781 | O   | GLN | A | 98  | 45.885 | -3.964 | 3.224  | 1.00 | -0.57 | O |
| ATOM | 782 | CB  | GLN | A | 98  | 47.906 | -5.765 | 1.230  | 1.00 | -0.00 | C |
| ATOM | 783 | CG  | GLN | A | 98  | 48.826 | -5.573 | 2.436  | 1.00 | -0.06 | C |
| ATOM | 784 | CD  | GLN | A | 98  | 50.014 | -6.521 | 2.381  | 1.00 | 0.70  | C |
| ATOM | 785 | NE2 | GLN | A | 98  | 50.107 | -7.436 | 3.329  | 1.00 | -0.94 | N |
| ATOM | 786 | OE1 | GLN | A | 98  | 50.849 | -6.448 | 1.490  | 1.00 | -0.61 | O |
| ATOM | 787 | N   | LEU | A | 99  | 45.783 | -3.240 | 1.085  | 1.00 | -0.42 | N |
| ATOM | 788 | CA  | LEU | A | 99  | 45.162 | -1.955 | 1.413  | 1.00 | -0.05 | C |
| ATOM | 789 | C   | LEU | A | 99  | 43.644 | -2.018 | 1.600  | 1.00 | 0.60  | C |
| ATOM | 790 | O   | LEU | A | 99  | 43.153 | -1.348 | 2.502  | 1.00 | -0.57 | O |
| ATOM | 791 | CB  | LEU | A | 99  | 45.482 | -0.893 | 0.353  | 1.00 | -0.11 | C |
| ATOM | 792 | CG  | LEU | A | 99  | 46.936 | -0.396 | 0.366  | 1.00 | 0.35  | C |
| ATOM | 793 | CD1 | LEU | A | 99  | 47.060 | 0.764  | -0.620 | 1.00 | -0.41 | C |
| ATOM | 794 | CD2 | LEU | A | 99  | 47.401 | 0.113  | 1.736  | 1.00 | -0.41 | C |
| ATOM | 795 | N   | ALA | A | 100 | 42.875 | -2.799 | 0.831  | 1.00 | -0.42 | N |
| ATOM | 796 | CA  | ALA | A | 100 | 41.414 | -2.864 | 0.977  | 1.00 | 0.03  | C |
| ATOM | 797 | C   | ALA | A | 100 | 40.977 | -3.291 | 2.381  | 1.00 | 0.60  | C |
| ATOM | 798 | O   | ALA | A | 100 | 40.141 | -2.617 | 2.988  | 1.00 | -0.57 | O |
| ATOM | 799 | CB  | ALA | A | 100 | 40.792 | -3.772 | -0.091 | 1.00 | -0.18 | C |
| ATOM | 800 | N   | THR | A | 101 | 41.576 | -4.357 | 2.926  | 1.00 | -0.42 | N |
| ATOM | 801 | CA  | THR | A | 101 | 41.350 | -4.727 | 4.330  | 1.00 | -0.04 | C |
| ATOM | 802 | C   | THR | A | 101 | 42.063 | -3.738 | 5.279  | 1.00 | 0.60  | C |
| ATOM | 803 | O   | THR | A | 101 | 41.454 | -3.244 | 6.232  | 1.00 | -0.57 | O |
| ATOM | 804 | CB  | THR | A | 101 | 41.808 | -6.178 | 4.584  | 1.00 | 0.37  | C |
| ATOM | 805 | CG2 | THR | A | 101 | 41.747 | -6.555 | 6.068  | 1.00 | -0.24 | C |
| ATOM | 806 | OG1 | THR | A | 101 | 41.006 | -7.107 | 3.883  | 1.00 | -0.68 | O |
| ATOM | 807 | N   | GLY | A | 102 | 43.343 | -3.417 | 5.006  | 1.00 | -0.42 | N |
| ATOM | 808 | CA  | GLY | A | 102 | 44.180 | -2.538 | 5.843  | 1.00 | -0.03 | C |
| ATOM | 809 | C   | GLY | A | 102 | 43.514 | -1.199 | 6.182  | 1.00 | 0.60  | C |
| ATOM | 810 | O   | GLY | A | 102 | 43.431 | -0.788 | 7.341  | 1.00 | -0.57 | O |
| ATOM | 811 | N   | ALA | A | 103 | 42.982 | -0.554 | 5.142  | 1.00 | -0.42 | N |
| ATOM | 812 | CA  | ALA | A | 103 | 42.264 | 0.710  | 5.208  | 1.00 | 0.03  | C |
| ATOM | 813 | C   | ALA | A | 103 | 40.999 | 0.650  | 6.081  | 1.00 | 0.60  | C |
| ATOM | 814 | O   | ALA | A | 103 | 40.744 | 1.603  | 6.824  | 1.00 | -0.57 | O |
| ATOM | 815 | CB  | ALA | A | 103 | 41.907 | 1.101  | 3.771  | 1.00 | -0.18 | C |
| ATOM | 816 | N   | ALA | A | 104 | 40.232 | -0.452 | 6.005  | 1.00 | -0.42 | N |
| ATOM | 817 | CA  | ALA | A | 104 | 39.128 | -0.707 | 6.922  | 1.00 | 0.03  | C |
| ATOM | 818 | C   | ALA | A | 104 | 39.637 | -0.943 | 8.353  | 1.00 | 0.60  | C |
| ATOM | 819 | O   | ALA | A | 104 | 39.271 | -0.175 | 9.244  | 1.00 | -0.57 | O |
| ATOM | 820 | CB  | ALA | A | 104 | 38.289 | -1.892 | 6.427  | 1.00 | -0.18 | C |
| ATOM | 821 | N   | CYS | A | 105 | 40.527 | -1.924 | 8.581  | 1.00 | -0.42 | N |
| ATOM | 822 | CA  | CYS | A | 105 | 40.934 | -2.295 | 9.939  | 1.00 | 0.02  | C |
| ATOM | 823 | C   | CYS | A | 105 | 41.597 | -1.127 | 10.680 | 1.00 | 0.60  | C |
| ATOM | 824 | O   | CYS | A | 105 | 41.289 | -0.888 | 11.850 | 1.00 | -0.57 | O |
| ATOM | 825 | CB  | CYS | A | 105 | 41.772 | -3.588 | 9.949  | 1.00 | -0.12 | C |
| ATOM | 826 | SG  | CYS | A | 105 | 43.388 | -3.431 | 9.145  | 1.00 | -0.31 | S |
| ATOM | 827 | N   | ARG | A | 106 | 42.415 | -0.320 | 9.981  | 1.00 | -0.35 | N |
| ATOM | 828 | CA  | ARG | A | 106 | 42.959 | 0.905  | 10.560 | 1.00 | -0.26 | C |
| ATOM | 829 | C   | ARG | A | 106 | 41.876 | 1.892  | 11.034 | 1.00 | 0.73  | C |
| ATOM | 830 | O   | ARG | A | 106 | 42.110 | 2.548  | 12.053 | 1.00 | -0.59 | O |
| ATOM | 831 | CB  | ARG | A | 106 | 43.947 | 1.587  | 9.595  | 1.00 | -0.00 | C |
| ATOM | 832 | CG  | ARG | A | 106 | 44.660 | 2.807  | 10.220 | 1.00 | 0.04  | C |
| ATOM | 833 | CD  | ARG | A | 106 | 45.590 | 2.428  | 11.386 | 1.00 | 0.05  | C |
| ATOM | 834 | NE  | ARG | A | 106 | 45.887 | 3.574  | 12.265 | 1.00 | -0.53 | N |
| ATOM | 835 | CZ  | ARG | A | 106 | 45.241 | 3.889  | 13.392 | 1.00 | 0.81  | C |
| ATOM | 836 | NH1 | ARG | A | 106 | 45.722 | 4.831  | 14.182 | 1.00 | -0.86 | N |
| ATOM | 837 | NH2 | ARG | A | 106 | 44.109 | 3.296  | 13.733 | 1.00 | -0.86 | N |
| ATOM | 838 | N   | LEU | A | 107 | 40.711 | 2.002  | 10.376 | 1.00 | -0.42 | N |
| ATOM | 839 | CA  | LEU | A | 107 | 39.618 | 2.835  | 10.884 | 1.00 | -0.05 | C |
| ATOM | 840 | C   | LEU | A | 107 | 38.958 | 2.162  | 12.087 | 1.00 | 0.60  | C |
| ATOM | 841 | O   | LEU | A | 107 | 38.768 | 2.789  | 13.130 | 1.00 | -0.57 | O |
| ATOM | 842 | CB  | LEU | A | 107 | 38.547 | 3.068  | 9.802  | 1.00 | -0.11 | C |
| ATOM | 843 | CG  | LEU | A | 107 | 37.433 | 4.036  | 10.268 | 1.00 | 0.35  | C |
| ATOM | 844 | CD1 | LEU | A | 107 | 37.894 | 5.489  | 10.149 | 1.00 | -0.41 | C |
| ATOM | 845 | CD2 | LEU | A | 107 | 36.138 | 3.866  | 9.476  | 1.00 | -0.41 | C |

|      |     |     |     |   |     |        |        |        |      |       |   |
|------|-----|-----|-----|---|-----|--------|--------|--------|------|-------|---|
| ATOM | 846 | N   | VAL | A | 108 | 38.567 | 0.892  | 11.951 | 1.00 | -0.42 | N |
| ATOM | 847 | CA  | VAL | A | 108 | 37.721 | 0.277  | 12.983 | 1.00 | -0.09 | C |
| ATOM | 848 | C   | VAL | A | 108 | 38.514 | -0.052 | 14.256 | 1.00 | 0.60  | C |
| ATOM | 849 | O   | VAL | A | 108 | 37.920 | -0.037 | 15.337 | 1.00 | -0.57 | O |
| ATOM | 850 | CB  | VAL | A | 108 | 36.877 | -0.894 | 12.450 | 1.00 | 0.30  | C |
| ATOM | 851 | CG1 | VAL | A | 108 | 35.739 | -1.221 | 13.424 | 1.00 | -0.32 | C |
| ATOM | 852 | CG2 | VAL | A | 108 | 36.235 | -0.532 | 11.096 | 1.00 | -0.32 | C |
| ATOM | 853 | N   | GLU | A | 109 | 39.850 | -0.197 | 14.182 | 1.00 | -0.52 | N |
| ATOM | 854 | CA  | GLU | A | 109 | 40.682 | -0.175 | 15.397 | 1.00 | 0.04  | C |
| ATOM | 855 | C   | GLU | A | 109 | 40.670 | 1.192  | 16.069 | 1.00 | 0.54  | C |
| ATOM | 856 | O   | GLU | A | 109 | 40.727 | 1.231  | 17.292 | 1.00 | -0.58 | O |
| ATOM | 857 | CB  | GLU | A | 109 | 42.144 | -0.603 | 15.172 | 1.00 | 0.06  | C |
| ATOM | 858 | CG  | GLU | A | 109 | 42.525 | -1.843 | 15.992 | 1.00 | 0.01  | C |
| ATOM | 859 | CD  | GLU | A | 109 | 42.112 | -3.131 | 15.302 | 1.00 | 0.81  | C |
| ATOM | 860 | OE1 | GLU | A | 109 | 41.298 | -3.892 | 15.883 | 1.00 | -0.82 | O |
| ATOM | 861 | OE2 | GLU | A | 109 | 42.666 | -3.335 | 14.197 | 1.00 | -0.82 | O |
| ATOM | 862 | N   | ALA | A | 110 | 40.552 | 2.305  | 15.334 | 1.00 | -0.42 | N |
| ATOM | 863 | CA  | ALA | A | 110 | 40.415 | 3.625  | 15.957 | 1.00 | 0.03  | C |
| ATOM | 864 | C   | ALA | A | 110 | 39.054 | 3.756  | 16.661 | 1.00 | 0.60  | C |
| ATOM | 865 | O   | ALA | A | 110 | 39.005 | 4.138  | 17.829 | 1.00 | -0.57 | O |
| ATOM | 866 | CB  | ALA | A | 110 | 40.616 | 4.738  | 14.924 | 1.00 | -0.18 | C |
| ATOM | 867 | N   | VAL | A | 111 | 37.958 | 3.371  | 15.992 | 1.00 | -0.42 | N |
| ATOM | 868 | CA  | VAL | A | 111 | 36.628 | 3.396  | 16.628 | 1.00 | -0.09 | C |
| ATOM | 869 | C   | VAL | A | 111 | 36.589 | 2.489  | 17.865 | 1.00 | 0.60  | C |
| ATOM | 870 | O   | VAL | A | 111 | 36.252 | 2.950  | 18.957 | 1.00 | -0.57 | O |
| ATOM | 871 | CB  | VAL | A | 111 | 35.483 | 3.052  | 15.649 | 1.00 | 0.30  | C |
| ATOM | 872 | CG1 | VAL | A | 111 | 34.108 | 3.128  | 16.337 | 1.00 | -0.32 | C |
| ATOM | 873 | CG2 | VAL | A | 111 | 35.471 | 4.005  | 14.443 | 1.00 | -0.32 | C |
| ATOM | 874 | N   | LEU | A | 112 | 36.985 | 1.209  | 17.735 | 1.00 | -0.42 | N |
| ATOM | 875 | CA  | LEU | A | 112 | 36.987 | 0.281  | 18.868 | 1.00 | -0.05 | C |
| ATOM | 876 | C   | LEU | A | 112 | 38.004 | 0.678  | 19.956 | 1.00 | 0.60  | C |
| ATOM | 877 | O   | LEU | A | 112 | 37.720 | 0.457  | 21.131 | 1.00 | -0.57 | O |
| ATOM | 878 | CB  | LEU | A | 112 | 37.194 | -1.167 | 18.377 | 1.00 | -0.11 | C |
| ATOM | 879 | CG  | LEU | A | 112 | 37.078 | -2.232 | 19.494 | 1.00 | 0.35  | C |
| ATOM | 880 | CD1 | LEU | A | 112 | 35.696 | -2.305 | 20.157 | 1.00 | -0.41 | C |
| ATOM | 881 | CD2 | LEU | A | 112 | 37.374 | -3.617 | 18.922 | 1.00 | -0.41 | C |
| ATOM | 882 | N   | SER | A | 113 | 39.139 | 1.313  | 19.621 | 1.00 | -0.42 | N |
| ATOM | 883 | CA  | SER | A | 113 | 40.022 | 1.908  | 20.644 | 1.00 | -0.02 | C |
| ATOM | 884 | C   | SER | A | 113 | 39.395 | 3.134  | 21.356 | 1.00 | 0.60  | C |
| ATOM | 885 | O   | SER | A | 113 | 39.995 | 3.641  | 22.304 | 1.00 | -0.57 | O |
| ATOM | 886 | CB  | SER | A | 113 | 41.424 | 2.249  | 20.095 | 1.00 | 0.21  | C |
| ATOM | 887 | OG  | SER | A | 113 | 42.035 | 1.131  | 19.469 | 1.00 | -0.65 | O |
| ATOM | 888 | N   | GLY | A | 114 | 38.209 | 3.617  | 20.944 | 1.00 | -0.42 | N |
| ATOM | 889 | CA  | GLY | A | 114 | 37.330 | 4.506  | 21.721 | 1.00 | -0.03 | C |
| ATOM | 890 | C   | GLY | A | 114 | 37.750 | 5.977  | 21.796 | 1.00 | 0.60  | C |
| ATOM | 891 | O   | GLY | A | 114 | 36.930 | 6.861  | 21.552 | 1.00 | -0.57 | O |
| ATOM | 892 | N   | GLU | A | 115 | 39.033 | 6.244  | 22.077 | 1.00 | -0.52 | N |
| ATOM | 893 | CA  | GLU | A | 115 | 39.604 | 7.598  | 22.249 | 1.00 | 0.04  | C |
| ATOM | 894 | C   | GLU | A | 115 | 39.498 | 8.479  | 20.999 | 1.00 | 0.54  | C |
| ATOM | 895 | O   | GLU | A | 115 | 39.668 | 9.693  | 21.072 | 1.00 | -0.58 | O |
| ATOM | 896 | CB  | GLU | A | 115 | 41.093 | 7.528  | 22.645 | 1.00 | 0.06  | C |
| ATOM | 897 | CG  | GLU | A | 115 | 41.433 | 6.701  | 23.888 | 1.00 | 0.01  | C |
| ATOM | 898 | CD  | GLU | A | 115 | 40.726 | 7.223  | 25.130 | 1.00 | 0.81  | C |
| ATOM | 899 | OE1 | GLU | A | 115 | 41.252 | 8.187  | 25.729 | 1.00 | -0.82 | O |
| ATOM | 900 | OE2 | GLU | A | 115 | 39.670 | 6.639  | 25.455 | 1.00 | -0.82 | O |
| ATOM | 901 | N   | VAL | A | 116 | 39.262 | 7.853  | 19.841 | 1.00 | -0.42 | N |
| ATOM | 902 | CA  | VAL | A | 116 | 39.588 | 8.371  | 18.506 | 1.00 | -0.09 | C |
| ATOM | 903 | C   | VAL | A | 116 | 38.515 | 8.049  | 17.439 | 1.00 | 0.60  | C |
| ATOM | 904 | O   | VAL | A | 116 | 38.849 | 7.623  | 16.334 | 1.00 | -0.57 | O |
| ATOM | 905 | CB  | VAL | A | 116 | 41.036 | 7.961  | 18.105 | 1.00 | 0.30  | C |
| ATOM | 906 | CG1 | VAL | A | 116 | 42.077 | 8.860  | 18.791 | 1.00 | -0.32 | C |
| ATOM | 907 | CG2 | VAL | A | 116 | 41.411 | 6.506  | 18.408 | 1.00 | -0.32 | C |
| ATOM | 908 | N   | LEU | A | 117 | 37.238 | 8.317  | 17.780 | 1.00 | -0.42 | N |
| ATOM | 909 | CA  | LEU | A | 117 | 36.069 | 8.681  | 16.931 | 1.00 | -0.05 | C |
| ATOM | 910 | C   | LEU | A | 117 | 34.947 | 7.609  | 16.862 | 1.00 | 0.60  | C |
| ATOM | 911 | O   | LEU | A | 117 | 35.200 | 6.422  | 16.987 | 1.00 | -0.57 | O |
| ATOM | 912 | CB  | LEU | A | 117 | 36.500 | 9.164  | 15.522 | 1.00 | -0.11 | C |
| ATOM | 913 | CG  | LEU | A | 117 | 35.427 | 9.883  | 14.680 | 1.00 | 0.35  | C |
| ATOM | 914 | CD1 | LEU | A | 117 | 34.840 | 11.124 | 15.360 | 1.00 | -0.41 | C |
| ATOM | 915 | CD2 | LEU | A | 117 | 36.019 | 10.311 | 13.335 | 1.00 | -0.41 | C |
| ATOM | 916 | N   | ASN | A | 118 | 33.697 | 8.031  | 16.608 | 1.00 | -0.42 | N |
| ATOM | 917 | CA  | ASN | A | 118 | 32.484 | 7.186  | 16.600 | 1.00 | 0.01  | C |
| ATOM | 918 | C   | ASN | A | 118 | 31.569 | 7.354  | 15.349 | 1.00 | 0.60  | C |
| ATOM | 919 | O   | ASN | A | 118 | 30.612 | 6.599  | 15.173 | 1.00 | -0.57 | O |
| ATOM | 920 | CB  | ASN | A | 118 | 31.737 | 7.476  | 17.918 | 1.00 | -0.20 | C |
| ATOM | 921 | CG  | ASN | A | 118 | 30.633 | 6.475  | 18.245 | 1.00 | 0.71  | C |
| ATOM | 922 | ND2 | ASN | A | 118 | 29.379 | 6.822  | 17.995 | 1.00 | -0.92 | N |

|      |     |     |     |   |     |        |         |        |      |       |   |
|------|-----|-----|-----|---|-----|--------|---------|--------|------|-------|---|
| ATOM | 923 | OD1 | ASN | A | 118 | 30.894 | 5.386   | 18.740 | 1.00 | -0.59 | O |
| ATOM | 924 | N   | GLY | A | 119 | 31.866 | 8.307   | 14.454 | 1.00 | -0.42 | N |
| ATOM | 925 | CA  | GLY | A | 119 | 31.147 | 8.562   | 13.196 | 1.00 | -0.03 | C |
| ATOM | 926 | C   | GLY | A | 119 | 32.175 | 8.744   | 12.085 | 1.00 | 0.60  | O |
| ATOM | 927 | O   | GLY | A | 119 | 32.591 | 9.871   | 11.809 | 1.00 | -0.57 | C |
| ATOM | 928 | N   | ALA | A | 120 | 32.676 | 7.614   | 11.567 | 1.00 | -0.42 | N |
| ATOM | 929 | CA  | ALA | A | 120 | 34.047 | 7.549   | 11.060 | 1.00 | 0.03  | C |
| ATOM | 930 | C   | ALA | A | 120 | 34.153 | 6.864   | 9.686  | 1.00 | 0.60  | C |
| ATOM | 931 | O   | ALA | A | 120 | 33.432 | 5.909   | 9.400  | 1.00 | -0.57 | O |
| ATOM | 932 | CB  | ALA | A | 120 | 34.890 | 6.842   | 12.132 | 1.00 | -0.18 | C |
| ATOM | 933 | N   | ALA | A | 121 | 35.087 | 7.353   | 8.856  | 1.00 | -0.42 | N |
| ATOM | 934 | CA  | ALA | A | 121 | 35.052 | 7.127   | 7.416  | 1.00 | 0.03  | C |
| ATOM | 935 | C   | ALA | A | 121 | 36.374 | 6.723   | 6.751  | 1.00 | 0.60  | C |
| ATOM | 936 | O   | ALA | A | 121 | 37.464 | 7.144   | 7.153  | 1.00 | -0.57 | O |
| ATOM | 937 | CB  | ALA | A | 121 | 34.517 | 8.403   | 6.750  | 1.00 | -0.18 | C |
| ATOM | 938 | N   | VAL | A | 122 | 36.212 | 5.956   | 5.666  | 1.00 | -0.42 | N |
| ATOM | 939 | CA  | VAL | A | 122 | 37.229 | 5.703   | 4.642  | 1.00 | -0.09 | C |
| ATOM | 940 | C   | VAL | A | 122 | 36.517 | 5.468   | 3.305  | 1.00 | 0.60  | C |
| ATOM | 941 | O   | VAL | A | 122 | 35.790 | 4.497   | 3.152  | 1.00 | -0.57 | O |
| ATOM | 942 | CB  | VAL | A | 122 | 38.105 | 4.470   | 4.958  | 1.00 | 0.30  | C |
| ATOM | 943 | CG1 | VAL | A | 122 | 39.343 | 4.477   | 4.057  | 1.00 | -0.32 | C |
| ATOM | 944 | CG2 | VAL | A | 122 | 38.648 | 4.394   | 6.379  | 1.00 | -0.32 | C |
| ATOM | 945 | N   | VAL | A | 123 | 36.737 | 6.349   | 2.326  | 1.00 | -0.42 | N |
| ATOM | 946 | CA  | VAL | A | 123 | 36.111 | 6.326   | 0.985  | 1.00 | -0.09 | C |
| ATOM | 947 | C   | VAL | A | 123 | 36.556 | 5.169   | 0.048  | 1.00 | 0.60  | C |
| ATOM | 948 | O   | VAL | A | 123 | 36.090 | 5.105   | -1.091 | 1.00 | -0.57 | O |
| ATOM | 949 | CB  | VAL | A | 123 | 36.356 | 7.681   | 0.271  | 1.00 | 0.30  | C |
| ATOM | 950 | CG1 | VAL | A | 123 | 35.482 | 8.792   | 0.863  | 1.00 | -0.32 | C |
| ATOM | 951 | CG2 | VAL | A | 123 | 37.826 | 8.129   | 0.370  | 1.00 | -0.32 | C |
| ATOM | 952 | N   | ARG | A | 124 | 37.461 | 4.270   | 0.480  | 1.00 | -0.35 | N |
| ATOM | 953 | CA  | ARG | A | 124 | 38.133 | 3.295   | -0.402 | 1.00 | -0.26 | C |
| ATOM | 954 | C   | ARG | A | 124 | 37.939 | 1.797   | -0.131 | 1.00 | 0.73  | C |
| ATOM | 955 | O   | ARG | A | 124 | 38.019 | 1.038   | -1.089 | 1.00 | -0.59 | O |
| ATOM | 956 | CB  | ARG | A | 124 | 39.624 | 3.666   | -0.552 | 1.00 | -0.00 | C |
| ATOM | 957 | CG  | ARG | A | 124 | 40.536 | 3.362   | 0.636  | 1.00 | 0.04  | C |
| ATOM | 958 | CD  | ARG | A | 124 | 42.020 | 3.603   | 0.315  | 1.00 | 0.05  | C |
| ATOM | 959 | NE  | ARG | A | 124 | 42.430 | 5.010   | 0.118  | 1.00 | -0.53 | N |
| ATOM | 960 | CZ  | ARG | A | 124 | 42.433 | 5.986   | 1.020  | 1.00 | 0.81  | C |
| ATOM | 961 | NH1 | ARG | A | 124 | 43.267 | 6.982   | 0.841  | 1.00 | -0.86 | N |
| ATOM | 962 | NH2 | ARG | A | 124 | 41.671 | 5.989   | 2.101  | 1.00 | -0.86 | N |
| ATOM | 963 | N   | PRO | A | 125 | 37.746 | 1.278   | 1.098  | 1.00 | -0.25 | N |
| ATOM | 964 | CA  | PRO | A | 125 | 37.705 | -0.161  | 1.344  | 1.00 | -0.03 | C |
| ATOM | 965 | C   | PRO | A | 125 | 36.805 | -0.986  | 0.416  | 1.00 | 0.59  | C |
| ATOM | 966 | O   | PRO | A | 125 | 37.316 | -2.009  | -0.042 | 1.00 | -0.57 | O |
| ATOM | 967 | CB  | PRO | A | 125 | 37.344 | -0.331  | 2.818  | 1.00 | -0.01 | C |
| ATOM | 968 | CG  | PRO | A | 125 | 37.971 | 0.914   | 3.431  | 1.00 | 0.02  | C |
| ATOM | 969 | CD  | PRO | A | 125 | 37.693 | 1.968   | 2.364  | 1.00 | 0.02  | C |
| ATOM | 970 | N   | PRO | A | 126 | 35.529 | -0.636  | 0.140  | 1.00 | -0.25 | N |
| ATOM | 971 | CA  | PRO | A | 126 | 34.535 | -1.559  | -0.408 | 1.00 | -0.03 | C |
| ATOM | 972 | C   | PRO | A | 126 | 34.881 | -2.417  | -1.629 | 1.00 | 0.59  | C |
| ATOM | 973 | O   | PRO | A | 126 | 34.830 | -1.979  | -2.781 | 1.00 | -0.57 | O |
| ATOM | 974 | CB  | PRO | A | 126 | 33.284 | -0.743  | -0.656 | 1.00 | -0.01 | C |
| ATOM | 975 | CG  | PRO | A | 126 | 33.344 | 0.294   | 0.443  | 1.00 | 0.02  | C |
| ATOM | 976 | CD  | PRO | A | 126 | 34.842 | 0.592   | 0.530  | 1.00 | 0.02  | C |
| ATOM | 977 | N   | GLY | A | 127 | 35.094 | -3.708  | -1.349 | 1.00 | -0.42 | N |
| ATOM | 978 | CA  | GLY | A | 127 | 35.135 | -4.787  | -2.331 | 1.00 | -0.03 | C |
| ATOM | 979 | C   | GLY | A | 127 | 33.931 | -5.723  | -2.178 | 1.00 | 0.60  | C |
| ATOM | 980 | O   | GLY | A | 127 | 34.097 | -6.944  | -2.196 | 1.00 | -0.57 | O |
| ATOM | 981 | N   | HIS | A | 128 | 32.729 | -5.160  | -1.972 | 1.00 | -0.42 | N |
| ATOM | 982 | CA  | HIS | A | 128 | 31.535 | -5.876  | -1.494 | 1.00 | -0.06 | C |
| ATOM | 983 | C   | HIS | A | 128 | 31.097 | -7.098  | -2.320 | 1.00 | 0.60  | C |
| ATOM | 984 | O   | HIS | A | 128 | 30.525 | -8.029  | -1.751 | 1.00 | -0.57 | O |
| ATOM | 985 | CB  | HIS | A | 128 | 30.366 | -4.889  | -1.264 | 1.00 | -0.01 | C |
| ATOM | 986 | CG  | HIS | A | 128 | 29.582 | -4.421  | -2.474 | 1.00 | 0.19  | C |
| ATOM | 987 | CD2 | HIS | A | 128 | 29.768 | -3.248  | -3.152 | 1.00 | -0.22 | C |
| ATOM | 988 | ND1 | HIS | A | 128 | 28.397 | -5.007  | -2.918 | 1.00 | -0.54 | N |
| ATOM | 989 | CE1 | HIS | A | 128 | 27.884 | -4.160  | -3.821 | 1.00 | 0.16  | C |
| ATOM | 990 | NE2 | HIS | A | 128 | 28.692 | -3.103  | -4.003 | 1.00 | -0.28 | N |
| ATOM | 991 | N   | HIS | A | 129 | 31.415 | -7.138  | -3.619 | 1.00 | -0.42 | N |
| ATOM | 992 | CA  | HIS | A | 129 | 31.098 | -8.297  | -4.451 | 1.00 | -0.06 | C |
| ATOM | 993 | C   | HIS | A | 129 | 32.075 | -9.479  | -4.279 | 1.00 | 0.60  | C |
| ATOM | 994 | O   | HIS | A | 129 | 31.716 | -10.583 | -4.675 | 1.00 | -0.57 | O |
| ATOM | 995 | CB  | HIS | A | 129 | 31.014 | -7.862  | -5.931 | 1.00 | -0.01 | C |
| ATOM | 996 | CG  | HIS | A | 129 | 29.878 | -6.912  | -6.241 | 1.00 | 0.19  | C |
| ATOM | 997 | CD2 | HIS | A | 129 | 29.982 | -5.687  | -6.840 | 1.00 | -0.22 | C |
| ATOM | 998 | ND1 | HIS | A | 129 | 28.534 | -7.168  | -5.973 | 1.00 | -0.54 | N |
| ATOM | 999 | CE1 | HIS | A | 129 | 27.861 | -6.085  | -6.379 | 1.00 | 0.16  | C |

|      |      |     |     |   |     |        |         |         |      |       |   |
|------|------|-----|-----|---|-----|--------|---------|---------|------|-------|---|
| ATOM | 1000 | NE2 | HIS | A | 129 | 28.701 | -5.180  | -6.916  | 1.00 | -0.28 | N |
| ATOM | 1001 | N   | ALA | A | 130 | 33.299 | -9.293  | -3.748  | 1.00 | -0.42 | N |
| ATOM | 1002 | CA  | ALA | A | 130 | 34.330 | -10.348 | -3.730  | 1.00 | 0.03  | C |
| ATOM | 1003 | C   | ALA | A | 130 | 33.933 | -11.537 | -2.832  | 1.00 | 0.60  | C |
| ATOM | 1004 | O   | ALA | A | 130 | 33.174 | -11.346 | -1.877  | 1.00 | -0.57 | O |
| ATOM | 1005 | CB  | ALA | A | 130 | 35.660 | -9.748  | -3.271  | 1.00 | -0.18 | C |
| ATOM | 1006 | N   | GLU | A | 131 | 34.460 | -12.741 | -3.095  | 1.00 | -0.52 | N |
| ATOM | 1007 | CA  | GLU | A | 131 | 34.017 | -13.998 | -2.443  | 1.00 | 0.04  | C |
| ATOM | 1008 | C   | GLU | A | 131 | 35.229 | -14.841 | -2.025  | 1.00 | 0.54  | C |
| ATOM | 1009 | O   | GLU | A | 131 | 36.339 | -14.575 | -2.484  | 1.00 | -0.58 | O |
| ATOM | 1010 | CB  | GLU | A | 131 | 33.055 | -14.748 | -3.387  | 1.00 | 0.06  | C |
| ATOM | 1011 | CG  | GLU | A | 131 | 31.740 | -13.972 | -3.538  | 1.00 | 0.01  | C |
| ATOM | 1012 | CD  | GLU | A | 131 | 30.857 | -14.553 | -4.620  | 1.00 | 0.81  | C |
| ATOM | 1013 | OE1 | GLU | A | 131 | 30.301 | -15.637 | -4.359  | 1.00 | -0.82 | O |
| ATOM | 1014 | OE2 | GLU | A | 131 | 30.723 | -13.914 | -5.683  | 1.00 | -0.82 | O |
| ATOM | 1015 | N   | GLN | A | 132 | 35.063 | -15.799 | -1.104  | 1.00 | -0.42 | N |
| ATOM | 1016 | CA  | GLN | A | 132 | 36.148 | -16.293 | -0.231  | 1.00 | -0.00 | C |
| ATOM | 1017 | C   | GLN | A | 132 | 37.436 | -16.814 | -0.923  | 1.00 | 0.60  | C |
| ATOM | 1018 | O   | GLN | A | 132 | 38.500 | -16.778 | -0.300  | 1.00 | -0.57 | O |
| ATOM | 1019 | CB  | GLN | A | 132 | 35.611 | -17.334 | 0.770   | 1.00 | -0.00 | C |
| ATOM | 1020 | CG  | GLN | A | 132 | 34.723 | -16.757 | 1.894   | 1.00 | -0.06 | C |
| ATOM | 1021 | CD  | GLN | A | 132 | 33.247 | -16.579 | 1.556   | 1.00 | 0.70  | C |
| ATOM | 1022 | NE2 | GLN | A | 132 | 32.415 | -16.437 | 2.578   | 1.00 | -0.94 | N |
| ATOM | 1023 | OE1 | GLN | A | 132 | 32.838 | -16.569 | 0.400   | 1.00 | -0.61 | O |
| ATOM | 1024 | N   | ASP | A | 133 | 37.385 | -17.242 | -2.188  | 1.00 | -0.52 | N |
| ATOM | 1025 | CA  | ASP | A | 133 | 38.551 | -17.565 | -3.024  | 1.00 | 0.04  | C |
| ATOM | 1026 | C   | ASP | A | 133 | 38.422 | -16.979 | -4.451  | 1.00 | 0.54  | C |
| ATOM | 1027 | O   | ASP | A | 133 | 39.074 | -17.465 | -5.374  | 1.00 | -0.58 | O |
| ATOM | 1028 | CB  | ASP | A | 133 | 38.781 | -19.096 | -3.008  | 1.00 | -0.03 | C |
| ATOM | 1029 | CG  | ASP | A | 133 | 37.671 | -19.961 | -3.608  | 1.00 | 0.80  | C |
| ATOM | 1030 | OD1 | ASP | A | 133 | 37.784 | -21.196 | -3.444  | 1.00 | -0.80 | O |
| ATOM | 1031 | OD2 | ASP | A | 133 | 36.709 | -19.384 | -4.177  | 1.00 | -0.80 | O |
| ATOM | 1032 | N   | ALA | A | 134 | 37.605 | -15.933 | -4.638  | 1.00 | -0.42 | N |
| ATOM | 1033 | CA  | ALA | A | 134 | 37.201 | -15.436 | -5.950  | 1.00 | 0.03  | C |
| ATOM | 1034 | C   | ALA | A | 134 | 37.091 | -13.904 | -6.006  | 1.00 | 0.60  | C |
| ATOM | 1035 | O   | ALA | A | 134 | 36.388 | -13.270 | -5.208  | 1.00 | -0.57 | O |
| ATOM | 1036 | CB  | ALA | A | 134 | 35.859 | -16.080 | -6.309  | 1.00 | -0.18 | C |
| ATOM | 1037 | N   | ALA | A | 135 | 37.731 | -13.301 | -7.010  | 1.00 | -0.42 | N |
| ATOM | 1038 | CA  | ALA | A | 135 | 37.404 | -11.919 | -7.361  | 1.00 | 0.03  | C |
| ATOM | 1039 | C   | ALA | A | 135 | 35.966 | -11.857 | -7.930  | 1.00 | 0.60  | C |
| ATOM | 1040 | O   | ALA | A | 135 | 35.517 | -12.826 | -8.540  | 1.00 | -0.57 | O |
| ATOM | 1041 | CB  | ALA | A | 135 | 38.455 | -11.393 | -8.339  | 1.00 | -0.18 | C |
| ATOM | 1042 | N   | CYS | A | 136 | 35.257 | -10.732 | -7.783  | 1.00 | -0.42 | N |
| ATOM | 1043 | CA  | CYS | A | 136 | 33.916 | -10.576 | -8.362  | 1.00 | 0.02  | C |
| ATOM | 1044 | C   | CYS | A | 136 | 33.558 | -9.099  | -8.557  | 1.00 | 0.60  | C |
| ATOM | 1045 | O   | CYS | A | 136 | 33.873 | -8.274  | -7.703  | 1.00 | -0.57 | O |
| ATOM | 1046 | CB  | CYS | A | 136 | 32.883 | -11.261 | -7.446  | 1.00 | -0.12 | C |
| ATOM | 1047 | SG  | CYS | A | 136 | 32.144 | -12.699 | -8.267  | 1.00 | -0.31 | S |
| ATOM | 1048 | N   | GLY | A | 137 | 32.888 | -8.763  | -9.671  | 1.00 | -0.42 | N |
| ATOM | 1049 | CA  | GLY | A | 137 | 32.423 | -7.409  | -10.012 | 1.00 | -0.03 | C |
| ATOM | 1050 | C   | GLY | A | 137 | 33.369 | -6.278  | -9.591  | 1.00 | 0.60  | C |
| ATOM | 1051 | O   | GLY | A | 137 | 33.013 | -5.460  | -8.744  | 1.00 | -0.57 | O |
| ATOM | 1052 | N   | PHE | A | 138 | 34.587 | -6.248  | -10.149 | 1.00 | -0.42 | N |
| ATOM | 1053 | CA  | PHE | A | 138 | 35.627 | -5.240  | -9.874  | 1.00 | -0.00 | C |
| ATOM | 1054 | C   | PHE | A | 138 | 36.186 | -5.235  | -8.432  | 1.00 | 0.60  | C |
| ATOM | 1055 | O   | PHE | A | 138 | 36.933 | -4.321  | -8.058  | 1.00 | -0.57 | O |
| ATOM | 1056 | CB  | PHE | A | 138 | 35.152 | -3.844  | -10.317 | 1.00 | -0.03 | C |
| ATOM | 1057 | CG  | PHE | A | 138 | 34.385 | -3.796  | -11.630 | 1.00 | 0.01  | C |
| ATOM | 1058 | CD1 | PHE | A | 138 | 35.021 | -4.147  | -12.835 | 1.00 | -0.13 | C |
| ATOM | 1059 | CD2 | PHE | A | 138 | 33.028 | -3.414  | -11.647 | 1.00 | -0.13 | C |
| ATOM | 1060 | CE1 | PHE | A | 138 | 34.310 | -4.127  | -14.048 | 1.00 | -0.17 | C |
| ATOM | 1061 | CE2 | PHE | A | 138 | 32.315 | -3.393  | -12.860 | 1.00 | -0.17 | C |
| ATOM | 1062 | CZ  | PHE | A | 138 | 32.954 | -3.755  | -14.059 | 1.00 | -0.11 | C |
| ATOM | 1063 | N   | CYS | A | 139 | 35.855 | -6.262  | -7.636  | 1.00 | -0.42 | N |
| ATOM | 1064 | CA  | CYS | A | 139 | 36.270 | -6.416  | -6.248  | 1.00 | 0.02  | C |
| ATOM | 1065 | C   | CYS | A | 139 | 37.230 | -7.605  | -6.103  | 1.00 | 0.60  | C |
| ATOM | 1066 | O   | CYS | A | 139 | 36.891 | -8.751  | -6.420  | 1.00 | -0.57 | O |
| ATOM | 1067 | CB  | CYS | A | 139 | 35.045 | -6.603  | -5.348  | 1.00 | -0.12 | C |
| ATOM | 1068 | SG  | CYS | A | 139 | 33.823 | -5.277  | -5.584  | 1.00 | -0.31 | S |
| ATOM | 1069 | N   | PHE | A | 140 | 38.441 | -7.305  | -5.608  | 1.00 | -0.42 | N |
| ATOM | 1070 | CA  | PHE | A | 140 | 39.539 | -8.259  | -5.399  | 1.00 | -0.00 | C |
| ATOM | 1071 | C   | PHE | A | 140 | 39.605 | -8.841  | -3.979  | 1.00 | 0.60  | C |
| ATOM | 1072 | O   | PHE | A | 140 | 40.271 | -9.856  | -3.776  | 1.00 | -0.57 | O |
| ATOM | 1073 | CB  | PHE | A | 140 | 40.885 | -7.563  | -5.670  | 1.00 | -0.03 | C |
| ATOM | 1074 | CG  | PHE | A | 140 | 41.147 | -7.182  | -7.111  | 1.00 | 0.01  | C |
| ATOM | 1075 | CD1 | PHE | A | 140 | 41.035 | -8.156  | -8.119  | 1.00 | -0.13 | C |
| ATOM | 1076 | CD2 | PHE | A | 140 | 41.545 | -5.872  | -7.444  | 1.00 | -0.13 | C |

|      |      |     |     |   |     |        |         |        |      |       |   |
|------|------|-----|-----|---|-----|--------|---------|--------|------|-------|---|
| ATOM | 1077 | CE1 | PHE | A | 140 | 41.312 | -7.826  | -9.453 | 1.00 | -0.17 | C |
| ATOM | 1078 | CE2 | PHE | A | 140 | 41.822 | -5.541  | -8.780 | 1.00 | -0.17 | C |
| ATOM | 1079 | CZ  | PHE | A | 140 | 41.707 | -6.519  | -9.781 | 1.00 | -0.11 | C |
| ATOM | 1080 | N   | PHE | A | 141 | 38.976 | -8.199  | -2.991 | 1.00 | -0.42 | N |
| ATOM | 1081 | CA  | PHE | A | 141 | 38.957 | -8.663  | -1.607 | 1.00 | -0.00 | C |
| ATOM | 1082 | C   | PHE | A | 141 | 37.778 | -8.046  | -0.848 | 1.00 | 0.60  | C |
| ATOM | 1083 | O   | PHE | A | 141 | 37.523 | -6.848  | -0.982 | 1.00 | -0.57 | O |
| ATOM | 1084 | CB  | PHE | A | 141 | 40.281 | -8.287  | -0.924 | 1.00 | -0.03 | C |
| ATOM | 1085 | CG  | PHE | A | 141 | 40.692 | -9.300  | 0.116  | 1.00 | 0.01  | C |
| ATOM | 1086 | CD1 | PHE | A | 141 | 40.418 | -9.087  | 1.479  | 1.00 | -0.13 | C |
| ATOM | 1087 | CD2 | PHE | A | 141 | 41.323 | -10.486 | -0.300 | 1.00 | -0.13 | C |
| ATOM | 1088 | CE1 | PHE | A | 141 | 40.806 | -10.051 | 2.429  | 1.00 | -0.17 | C |
| ATOM | 1089 | CE2 | PHE | A | 141 | 41.690 | -11.452 | 0.648  | 1.00 | -0.17 | C |
| ATOM | 1090 | CZ  | PHE | A | 141 | 41.451 | -11.227 | 2.012  | 1.00 | -0.11 | C |
| ATOM | 1091 | N   | ASN | A | 142 | 37.059 | -8.845  | -0.054 | 1.00 | -0.42 | N |
| ATOM | 1092 | CA  | ASN | A | 142 | 35.837 | -8.388  | 0.607  | 1.00 | 0.01  | C |
| ATOM | 1093 | C   | ASN | A | 142 | 36.107 | -7.706  | 1.955  | 1.00 | 0.60  | C |
| ATOM | 1094 | O   | ASN | A | 142 | 35.816 | -8.223  | 3.036  | 1.00 | -0.57 | O |
| ATOM | 1095 | CB  | ASN | A | 142 | 34.777 | -9.489  | 0.670  | 1.00 | -0.20 | C |
| ATOM | 1096 | CG  | ASN | A | 142 | 33.395 | -8.852  | 0.712  | 1.00 | 0.71  | C |
| ATOM | 1097 | ND2 | ASN | A | 142 | 32.506 | -9.338  | -0.127 | 1.00 | -0.92 | N |
| ATOM | 1098 | OD1 | ASN | A | 142 | 33.140 | -7.902  | 1.450  | 1.00 | -0.59 | O |
| ATOM | 1099 | N   | SER | A | 143 | 36.674 | -6.508  | 1.869  | 1.00 | -0.42 | N |
| ATOM | 1100 | CA  | SER | A | 143 | 36.832 | -5.572  | 2.984  | 1.00 | -0.02 | C |
| ATOM | 1101 | C   | SER | A | 143 | 35.539 | -5.332  | 3.795  | 1.00 | 0.60  | C |
| ATOM | 1102 | O   | SER | A | 143 | 35.591 | -5.248  | 5.022  | 1.00 | -0.57 | O |
| ATOM | 1103 | CB  | SER | A | 143 | 37.292 | -4.251  | 2.378  | 1.00 | 0.21  | C |
| ATOM | 1104 | OG  | SER | A | 143 | 36.383 | -3.895  | 1.350  | 1.00 | -0.65 | O |
| ATOM | 1105 | N   | VAL | A | 144 | 34.380 | -5.252  | 3.124  | 1.00 | -0.42 | N |
| ATOM | 1106 | CA  | VAL | A | 144 | 33.079 | -4.983  | 3.762  | 1.00 | -0.09 | C |
| ATOM | 1107 | C   | VAL | A | 144 | 32.636 | -6.175  | 4.621  | 1.00 | 0.60  | C |
| ATOM | 1108 | O   | VAL | A | 144 | 32.122 | -5.992  | 5.722  | 1.00 | -0.57 | O |
| ATOM | 1109 | CB  | VAL | A | 144 | 31.992 | -4.644  | 2.718  | 1.00 | 0.30  | C |
| ATOM | 1110 | CG1 | VAL | A | 144 | 30.718 | -4.124  | 3.392  | 1.00 | -0.32 | C |
| ATOM | 1111 | CG2 | VAL | A | 144 | 32.451 | -3.587  | 1.703  | 1.00 | -0.32 | C |
| ATOM | 1112 | N   | ALA | A | 145 | 32.895 | -7.401  | 4.152  | 1.00 | -0.42 | N |
| ATOM | 1113 | CA  | ALA | A | 145 | 32.734 | -8.621  | 4.933  | 1.00 | 0.03  | C |
| ATOM | 1114 | C   | ALA | A | 145 | 33.781 | -8.700  | 6.048  | 1.00 | 0.60  | C |
| ATOM | 1115 | O   | ALA | A | 145 | 33.404 | -8.876  | 7.202  | 1.00 | -0.57 | O |
| ATOM | 1116 | CB  | ALA | A | 145 | 32.831 | -9.848  | 4.026  | 1.00 | -0.18 | C |
| ATOM | 1117 | N   | VAL | A | 146 | 35.075 | -8.534  | 5.742  | 1.00 | -0.42 | N |
| ATOM | 1118 | CA  | VAL | A | 146 | 36.142 | -8.548  | 6.760  | 1.00 | -0.09 | C |
| ATOM | 1119 | C   | VAL | A | 146 | 35.807 | -7.585  | 7.913  | 1.00 | 0.60  | C |
| ATOM | 1120 | O   | VAL | A | 146 | 35.959 | -7.930  | 9.091  | 1.00 | -0.57 | O |
| ATOM | 1121 | CB  | VAL | A | 146 | 37.521 | -8.223  | 6.139  | 1.00 | 0.30  | C |
| ATOM | 1122 | CG1 | VAL | A | 146 | 38.600 | -8.101  | 7.219  | 1.00 | -0.32 | C |
| ATOM | 1123 | CG2 | VAL | A | 146 | 38.017 | -9.301  | 5.167  | 1.00 | -0.32 | C |
| ATOM | 1124 | N   | ALA | A | 147 | 35.293 | -6.396  | 7.569  | 1.00 | -0.42 | N |
| ATOM | 1125 | CA  | ALA | A | 147 | 34.879 | -5.361  | 8.508  | 1.00 | 0.03  | C |
| ATOM | 1126 | C   | ALA | A | 147 | 33.750 | -5.762  | 9.481  | 1.00 | 0.60  | C |
| ATOM | 1127 | O   | ALA | A | 147 | 33.579 | -5.118  | 10.518 | 1.00 | -0.57 | O |
| ATOM | 1128 | CB  | ALA | A | 147 | 34.522 | -4.075  | 7.751  | 1.00 | -0.18 | C |
| ATOM | 1129 | N   | ALA | A | 148 | 33.011 | -6.841  | 9.194  | 1.00 | -0.42 | N |
| ATOM | 1130 | CA  | ALA | A | 148 | 31.994 | -7.411  | 10.080 | 1.00 | 0.03  | C |
| ATOM | 1131 | C   | ALA | A | 148 | 32.428 | -8.794  | 10.609 | 1.00 | 0.60  | C |
| ATOM | 1132 | O   | ALA | A | 148 | 31.603 | -9.659  | 10.914 | 1.00 | -0.57 | O |
| ATOM | 1133 | CB  | ALA | A | 148 | 30.651 | -7.389  | 9.352  | 1.00 | -0.18 | C |
| ATOM | 1134 | N   | ARG | A | 149 | 33.755 | -8.976  | 10.713 | 1.00 | -0.35 | N |
| ATOM | 1135 | CA  | ARG | A | 149 | 34.427 | -10.147 | 11.264 | 1.00 | -0.26 | C |
| ATOM | 1136 | C   | ARG | A | 149 | 35.579 | -9.770  | 12.235 | 1.00 | 0.73  | C |
| ATOM | 1137 | O   | ARG | A | 149 | 35.366 | -8.954  | 13.137 | 1.00 | -0.59 | O |
| ATOM | 1138 | CB  | ARG | A | 149 | 34.797 | -11.101 | 10.105 | 1.00 | -0.00 | C |
| ATOM | 1139 | CG  | ARG | A | 149 | 34.538 | -12.573 | 10.492 | 1.00 | 0.04  | C |
| ATOM | 1140 | CD  | ARG | A | 149 | 33.036 | -12.859 | 10.556 | 1.00 | 0.05  | C |
| ATOM | 1141 | NE  | ARG | A | 149 | 32.755 | -14.278 | 10.775 | 1.00 | -0.53 | N |
| ATOM | 1142 | CZ  | ARG | A | 149 | 31.508 | -14.752 | 10.930 | 1.00 | 0.81  | C |
| ATOM | 1143 | NH1 | ARG | A | 149 | 31.259 | -16.074 | 10.852 | 1.00 | -0.86 | N |
| ATOM | 1144 | NH2 | ARG | A | 149 | 30.485 | -13.923 | 11.140 | 1.00 | -0.86 | N |
| ATOM | 1145 | N   | HIS | A | 150 | 36.763 | -10.403 | 12.132 | 1.00 | -0.42 | N |
| ATOM | 1146 | CA  | HIS | A | 150 | 37.748 | -10.466 | 13.229 | 1.00 | -0.06 | C |
| ATOM | 1147 | C   | HIS | A | 150 | 39.134 | -9.812  | 12.979 | 1.00 | 0.60  | C |
| ATOM | 1148 | O   | HIS | A | 150 | 39.818 | -9.488  | 13.948 | 1.00 | -0.57 | O |
| ATOM | 1149 | CB  | HIS | A | 150 | 37.877 | -11.933 | 13.665 | 1.00 | -0.01 | C |
| ATOM | 1150 | CG  | HIS | A | 150 | 38.637 | -12.086 | 14.956 | 1.00 | 0.19  | C |
| ATOM | 1151 | CD2 | HIS | A | 150 | 39.892 | -12.610 | 15.083 | 1.00 | -0.22 | C |
| ATOM | 1152 | ND1 | HIS | A | 150 | 38.197 | -11.623 | 16.194 | 1.00 | -0.54 | N |
| ATOM | 1153 | CE1 | HIS | A | 150 | 39.211 | -11.867 | 17.041 | 1.00 | 0.16  | C |



|      |      |     |     |   |     |        |         |        |      |       |   |
|------|------|-----|-----|---|-----|--------|---------|--------|------|-------|---|
| ATOM | 1154 | NE2 | HIS | A | 150 | 40.239 | -12.461 | 16.406 | 1.00 | -0.28 | N |
| ATOM | 1155 | N   | ALA | A | 151 | 39.526 | -9.514  | 11.727 | 1.00 | -0.42 | N |
| ATOM | 1156 | CA  | ALA | A | 151 | 40.777 | -8.782  | 11.393 | 1.00 | 0.03  | C |
| ATOM | 1157 | C   | ALA | A | 151 | 40.950 | -7.397  | 12.068 | 1.00 | 0.60  | C |
| ATOM | 1158 | O   | ALA | A | 151 | 42.020 | -6.790  | 12.018 | 1.00 | -0.57 | O |
| ATOM | 1159 | CB  | ALA | A | 151 | 40.830 | -8.569  | 9.881  | 1.00 | -0.18 | C |
| ATOM | 1160 | N   | GLN | A | 152 | 39.862 | -6.910  | 12.662 | 1.00 | -0.42 | N |
| ATOM | 1161 | CA  | GLN | A | 152 | 39.675 | -5.614  | 13.306 | 1.00 | -0.00 | C |
| ATOM | 1162 | C   | GLN | A | 152 | 38.788 | -5.755  | 14.555 | 1.00 | 0.60  | C |
| ATOM | 1163 | O   | GLN | A | 152 | 38.043 | -4.846  | 14.914 | 1.00 | -0.57 | O |
| ATOM | 1164 | CB  | GLN | A | 152 | 39.087 | -4.642  | 12.278 | 1.00 | -0.00 | C |
| ATOM | 1165 | CG  | GLN | A | 152 | 37.792 | -5.145  | 11.623 | 1.00 | -0.06 | C |
| ATOM | 1166 | CD  | GLN | A | 152 | 37.197 | -4.054  | 10.763 | 1.00 | 0.70  | C |
| ATOM | 1167 | NE2 | GLN | A | 152 | 35.954 | -3.706  | 11.024 | 1.00 | -0.94 | N |
| ATOM | 1168 | OE1 | GLN | A | 152 | 37.822 | -3.526  | 9.853  | 1.00 | -0.61 | O |
| ATOM | 1169 | N   | THR | A | 153 | 38.808 | -6.945  | 15.170 | 1.00 | -0.42 | N |
| ATOM | 1170 | CA  | THR | A | 153 | 38.269 | -7.268  | 16.502 | 1.00 | -0.04 | C |
| ATOM | 1171 | C   | THR | A | 153 | 36.737 | -7.098  | 16.722 | 1.00 | 0.60  | C |
| ATOM | 1172 | O   | THR | A | 153 | 36.197 | -7.588  | 17.716 | 1.00 | -0.57 | O |
| ATOM | 1173 | CB  | THR | A | 153 | 39.116 | -6.550  | 17.585 | 1.00 | 0.37  | C |
| ATOM | 1174 | CG2 | THR | A | 153 | 39.155 | -7.352  | 18.891 | 1.00 | -0.24 | C |
| ATOM | 1175 | OG1 | THR | A | 153 | 40.475 | -6.344  | 17.207 | 1.00 | -0.68 | O |
| ATOM | 1176 | N   | ILE | A | 154 | 35.998 | -6.488  | 15.781 | 1.00 | -0.42 | N |
| ATOM | 1177 | CA  | ILE | A | 154 | 34.526 | -6.319  | 15.768 | 1.00 | -0.06 | C |
| ATOM | 1178 | C   | ILE | A | 154 | 33.742 | -7.560  | 16.227 | 1.00 | 0.60  | C |
| ATOM | 1179 | O   | ILE | A | 154 | 32.908 | -7.461  | 17.135 | 1.00 | -0.57 | O |
| ATOM | 1180 | CB  | ILE | A | 154 | 34.079 | -5.854  | 14.353 | 1.00 | 0.13  | C |
| ATOM | 1181 | CG1 | ILE | A | 154 | 34.314 | -4.342  | 14.154 | 1.00 | -0.04 | C |
| ATOM | 1182 | CG2 | ILE | A | 154 | 32.623 | -6.215  | 13.981 | 1.00 | -0.32 | C |
| ATOM | 1183 | CD1 | ILE | A | 154 | 33.423 | -3.421  | 15.000 | 1.00 | -0.07 | C |
| ATOM | 1184 | N   | SER | A | 155 | 34.034 | -8.728  | 15.639 | 1.00 | -0.42 | N |
| ATOM | 1185 | CA  | SER | A | 155 | 33.396 | -10.008 | 15.965 | 1.00 | -0.02 | C |
| ATOM | 1186 | C   | SER | A | 155 | 33.653 | -10.500 | 17.399 | 1.00 | 0.60  | C |
| ATOM | 1187 | O   | SER | A | 155 | 33.039 | -11.488 | 17.806 | 1.00 | -0.57 | O |
| ATOM | 1188 | CB  | SER | A | 155 | 33.867 | -11.076 | 14.972 | 1.00 | 0.21  | C |
| ATOM | 1189 | OG  | SER | A | 155 | 33.234 | -12.317 | 15.212 | 1.00 | -0.65 | O |
| ATOM | 1190 | N   | GLY | A | 156 | 34.547 | -9.846  | 18.156 | 1.00 | -0.42 | N |
| ATOM | 1191 | CA  | GLY | A | 156 | 34.818 | -10.121 | 19.568 | 1.00 | -0.03 | C |
| ATOM | 1192 | C   | GLY | A | 156 | 34.335 | -9.023  | 20.528 | 1.00 | 0.60  | C |
| ATOM | 1193 | O   | GLY | A | 156 | 34.534 | -9.175  | 21.731 | 1.00 | -0.57 | O |
| ATOM | 1194 | N   | HIS | A | 157 | 33.705 | -7.947  | 20.026 | 1.00 | -0.42 | N |
| ATOM | 1195 | CA  | HIS | A | 157 | 33.146 | -6.880  | 20.872 | 1.00 | 0.02  | C |
| ATOM | 1196 | C   | HIS | A | 157 | 31.692 | -6.497  | 20.526 | 1.00 | 0.60  | C |
| ATOM | 1197 | O   | HIS | A | 157 | 31.005 | -5.944  | 21.385 | 1.00 | -0.57 | O |
| ATOM | 1198 | CB  | HIS | A | 157 | 34.082 | -5.659  | 20.842 | 1.00 | -0.05 | C |
| ATOM | 1199 | CG  | HIS | A | 157 | 33.993 | -4.758  | 22.057 | 1.00 | -0.03 | C |
| ATOM | 1200 | CD2 | HIS | A | 157 | 33.087 | -3.755  | 22.284 | 1.00 | 0.13  | C |
| ATOM | 1201 | ND1 | HIS | A | 157 | 34.882 | -4.732  | 23.112 | 1.00 | -0.38 | N |
| ATOM | 1202 | CE1 | HIS | A | 157 | 34.522 | -3.734  | 23.941 | 1.00 | 0.21  | C |
| ATOM | 1203 | NE2 | HIS | A | 157 | 33.439 | -3.100  | 23.469 | 1.00 | -0.57 | N |
| ATOM | 1204 | N   | ALA | A | 158 | 31.175 | -6.814  | 19.326 | 1.00 | -0.42 | N |
| ATOM | 1205 | CA  | ALA | A | 158 | 29.772 | -6.588  | 18.978 | 1.00 | 0.03  | C |
| ATOM | 1206 | C   | ALA | A | 158 | 28.983 | -7.907  | 18.927 | 1.00 | 0.60  | C |
| ATOM | 1207 | O   | ALA | A | 158 | 29.171 | -8.731  | 18.036 | 1.00 | -0.57 | O |
| ATOM | 1208 | CB  | ALA | A | 158 | 29.699 | -5.816  | 17.663 | 1.00 | -0.18 | C |
| ATOM | 1209 | N   | LEU | A | 159 | 28.072 | -8.091  | 19.888 | 1.00 | -0.42 | N |
| ATOM | 1210 | CA  | LEU | A | 159 | 27.127 | -9.211  | 19.936 | 1.00 | -0.05 | C |
| ATOM | 1211 | C   | LEU | A | 159 | 26.091 | -9.178  | 18.782 | 1.00 | 0.60  | C |
| ATOM | 1212 | O   | LEU | A | 159 | 25.536 | -10.214 | 18.419 | 1.00 | -0.57 | O |
| ATOM | 1213 | CB  | LEU | A | 159 | 26.460 | -9.149  | 21.324 | 1.00 | -0.11 | C |
| ATOM | 1214 | CG  | LEU | A | 159 | 25.513 | -10.304 | 21.702 | 1.00 | 0.35  | C |
| ATOM | 1215 | CD1 | LEU | A | 159 | 26.219 | -11.662 | 21.719 | 1.00 | -0.41 | C |
| ATOM | 1216 | CD2 | LEU | A | 159 | 24.942 | -10.045 | 23.100 | 1.00 | -0.41 | C |
| ATOM | 1217 | N   | ARG | A | 160 | 25.840 | -7.987  | 18.211 | 1.00 | -0.35 | N |
| ATOM | 1218 | CA  | ARG | A | 160 | 24.874 | -7.694  | 17.135 | 1.00 | -0.26 | C |
| ATOM | 1219 | C   | ARG | A | 160 | 25.401 | -6.552  | 16.235 | 1.00 | 0.73  | C |
| ATOM | 1220 | O   | ARG | A | 160 | 25.570 | -5.435  | 16.729 | 1.00 | -0.59 | O |
| ATOM | 1221 | CB  | ARG | A | 160 | 23.525 | -7.239  | 17.746 | 1.00 | -0.00 | C |
| ATOM | 1222 | CG  | ARG | A | 160 | 22.782 | -8.317  | 18.554 | 1.00 | 0.04  | C |
| ATOM | 1223 | CD  | ARG | A | 160 | 21.424 | -7.851  | 19.128 | 1.00 | 0.05  | C |
| ATOM | 1224 | NE  | ARG | A | 160 | 21.446 | -6.556  | 19.850 | 1.00 | -0.53 | N |
| ATOM | 1225 | CZ  | ARG | A | 160 | 22.243 | -6.175  | 20.843 | 1.00 | 0.81  | C |
| ATOM | 1226 | NH1 | ARG | A | 160 | 22.181 | -4.941  | 21.273 | 1.00 | -0.86 | N |
| ATOM | 1227 | NH2 | ARG | A | 160 | 23.106 | -6.998  | 21.392 | 1.00 | -0.86 | N |
| ATOM | 1228 | N   | ILE | A | 161 | 25.638 | -6.802  | 14.937 | 1.00 | -0.42 | N |
| ATOM | 1229 | CA  | ILE | A | 161 | 26.185 | -5.842  | 13.954 | 1.00 | -0.06 | C |
| ATOM | 1230 | C   | ILE | A | 161 | 25.154 | -5.571  | 12.847 | 1.00 | 0.60  | C |

|      |      |     |     |   |     |        |        |         |      |       |   |
|------|------|-----|-----|---|-----|--------|--------|---------|------|-------|---|
| ATOM | 1231 | O   | ILE | A | 161 | 24.609 | -6.527 | 12.284  | 1.00 | -0.57 | O |
| ATOM | 1232 | CB  | ILE | A | 161 | 27.484 | -6.404 | 13.310  | 1.00 | 0.13  | C |
| ATOM | 1233 | CG1 | ILE | A | 161 | 28.610 | -6.672 | 14.332  | 1.00 | -0.04 | C |
| ATOM | 1234 | CG2 | ILE | A | 161 | 28.040 | -5.433 | 12.246  | 1.00 | -0.32 | C |
| ATOM | 1235 | CD1 | ILE | A | 161 | 28.584 | -8.066 | 14.970  | 1.00 | -0.07 | C |
| ATOM | 1236 | N   | LEU | A | 162 | 24.910 | -4.296 | 12.499  | 1.00 | -0.42 | N |
| ATOM | 1237 | CA  | LEU | A | 162 | 23.952 | -3.932 | 11.446  | 1.00 | -0.05 | C |
| ATOM | 1238 | C   | LEU | A | 162 | 24.650 | -3.398 | 10.179  | 1.00 | 0.60  | C |
| ATOM | 1239 | O   | LEU | A | 162 | 25.164 | -2.274 | 10.150  | 1.00 | -0.57 | O |
| ATOM | 1240 | CB  | LEU | A | 162 | 22.895 | -2.974 | 12.028  | 1.00 | -0.11 | C |
| ATOM | 1241 | CG  | LEU | A | 162 | 21.754 | -2.596 | 11.058  | 1.00 | 0.35  | C |
| ATOM | 1242 | CD1 | LEU | A | 162 | 20.996 | -3.817 | 10.524  | 1.00 | -0.41 | C |
| ATOM | 1243 | CD2 | LEU | A | 162 | 20.731 | -1.701 | 11.766  | 1.00 | -0.41 | C |
| ATOM | 1244 | N   | ILE | A | 163 | 24.624 | -4.212 | 9.116   | 1.00 | -0.42 | N |
| ATOM | 1245 | CA  | ILE | A | 163 | 25.136 | -3.810 | 7.803   | 1.00 | -0.06 | C |
| ATOM | 1246 | C   | ILE | A | 163 | 23.987 | -3.220 | 6.972   | 1.00 | 0.60  | C |
| ATOM | 1247 | O   | ILE | A | 163 | 22.956 | -3.873 | 6.763   | 1.00 | -0.57 | O |
| ATOM | 1248 | CB  | ILE | A | 163 | 25.855 | -4.967 | 7.071   | 1.00 | 0.13  | C |
| ATOM | 1249 | CG1 | ILE | A | 163 | 26.903 | -5.637 | 7.994   | 1.00 | -0.04 | C |
| ATOM | 1250 | CG2 | ILE | A | 163 | 26.505 | -4.398 | 5.790   | 1.00 | -0.32 | C |
| ATOM | 1251 | CD1 | ILE | A | 163 | 27.730 | -6.750 | 7.341   | 1.00 | -0.07 | C |
| ATOM | 1252 | N   | VAL | A | 164 | 24.183 | -1.982 | 6.491   | 1.00 | -0.42 | N |
| ATOM | 1253 | CA  | VAL | A | 164 | 23.209 | -1.286 | 5.628   | 1.00 | -0.09 | C |
| ATOM | 1254 | C   | VAL | A | 164 | 23.787 | -1.028 | 4.227   | 1.00 | 0.60  | O |
| ATOM | 1255 | O   | VAL | A | 164 | 24.577 | -0.102 | 4.008   | 1.00 | -0.57 | O |
| ATOM | 1256 | CB  | VAL | A | 164 | 22.587 | -0.015 | 6.262   | 1.00 | 0.30  | C |
| ATOM | 1257 | CG1 | VAL | A | 164 | 21.054 | -0.144 | 6.261   | 1.00 | -0.32 | C |
| ATOM | 1258 | CG2 | VAL | A | 164 | 23.012 | 0.266  | 7.716   | 1.00 | -0.32 | C |
| ATOM | 1259 | N   | ASP | A | 165 | 23.356 | -1.897 | 3.305   | 1.00 | -0.52 | N |
| ATOM | 1260 | CA  | ASP | A | 165 | 23.741 | -1.978 | 1.898   | 1.00 | 0.04  | C |
| ATOM | 1261 | C   | ASP | A | 165 | 22.830 | -1.074 | 1.048   | 1.00 | 0.54  | O |
| ATOM | 1262 | O   | ASP | A | 165 | 21.611 | -1.276 | 0.954   | 1.00 | -0.58 | O |
| ATOM | 1263 | CB  | ASP | A | 165 | 23.727 | -3.471 | 1.507   | 1.00 | -0.03 | C |
| ATOM | 1264 | CG  | ASP | A | 165 | 23.725 | -3.832 | 0.010   | 1.00 | 0.80  | C |
| ATOM | 1265 | OD1 | ASP | A | 165 | 22.889 | -3.291 | -0.748  | 1.00 | -0.80 | O |
| ATOM | 1266 | OD2 | ASP | A | 165 | 24.520 | -4.725 | -0.359  | 1.00 | -0.80 | O |
| ATOM | 1267 | N   | TRP | A | 166 | 23.463 | -0.048 | 0.470   | 1.00 | -0.42 | N |
| ATOM | 1268 | CA  | TRP | A | 166 | 22.857 | 0.993  | -0.368  | 1.00 | -0.03 | C |
| ATOM | 1269 | C   | TRP | A | 166 | 23.684 | 1.222  | -1.662  | 1.00 | 0.60  | C |
| ATOM | 1270 | O   | TRP | A | 166 | 23.751 | 2.342  | -2.184  | 1.00 | -0.57 | O |
| ATOM | 1271 | CB  | TRP | A | 166 | 22.677 | 2.305  | 0.430   | 1.00 | -0.01 | C |
| ATOM | 1272 | CG  | TRP | A | 166 | 22.028 | 2.300  | 1.794   | 1.00 | -0.14 | C |
| ATOM | 1273 | CD1 | TRP | A | 166 | 21.045 | 1.493  | 2.255   | 1.00 | -0.16 | C |
| ATOM | 1274 | CD2 | TRP | A | 166 | 22.266 | 3.241  | 2.883   | 1.00 | 0.12  | C |
| ATOM | 1275 | CE2 | TRP | A | 166 | 21.473 | 2.882  | 4.009   | 1.00 | 0.14  | C |
| ATOM | 1276 | CE3 | TRP | A | 166 | 23.070 | 4.387  | 3.012   | 1.00 | -0.24 | C |
| ATOM | 1277 | NE1 | TRP | A | 166 | 20.753 | 1.788  | 3.570   | 1.00 | -0.34 | N |
| ATOM | 1278 | CZ2 | TRP | A | 166 | 21.532 | 3.603  | 5.216   | 1.00 | -0.26 | C |
| ATOM | 1279 | CZ3 | TRP | A | 166 | 23.058 | 5.178  | 4.175   | 1.00 | -0.20 | C |
| ATOM | 1280 | CH2 | TRP | A | 166 | 22.292 | 4.783  | 5.281   | 1.00 | -0.11 | C |
| ATOM | 1281 | N   | ASP | A | 167 | 24.353 | 0.167  | -2.164  | 1.00 | -0.52 | N |
| ATOM | 1282 | CA  | ASP | A | 167 | 24.744 | 0.089  | -3.581  | 1.00 | 0.04  | C |
| ATOM | 1283 | C   | ASP | A | 167 | 23.470 | -0.105 | -4.425  | 1.00 | 0.54  | C |
| ATOM | 1284 | O   | ASP | A | 167 | 22.479 | -0.652 | -3.940  | 1.00 | -0.58 | O |
| ATOM | 1285 | CB  | ASP | A | 167 | 25.823 | -0.977 | -3.908  | 1.00 | -0.03 | C |
| ATOM | 1286 | CG  | ASP | A | 167 | 26.599 | -0.761 | -5.248  | 1.00 | 0.80  | C |
| ATOM | 1287 | OD1 | ASP | A | 167 | 27.812 | -1.096 | -5.240  | 1.00 | -0.80 | O |
| ATOM | 1288 | OD2 | ASP | A | 167 | 26.007 | -0.297 | -6.261  | 1.00 | -0.80 | O |
| ATOM | 1289 | N   | VAL | A | 168 | 23.464 | 0.372  | -5.677  | 1.00 | -0.42 | N |
| ATOM | 1290 | CA  | VAL | A | 168 | 22.353 | 0.144  | -6.613  | 1.00 | -0.09 | C |
| ATOM | 1291 | C   | VAL | A | 168 | 22.304 | -1.329 | -7.023  | 1.00 | 0.60  | O |
| ATOM | 1292 | O   | VAL | A | 168 | 21.216 | -1.875 | -7.227  | 1.00 | -0.57 | O |
| ATOM | 1293 | CB  | VAL | A | 168 | 22.413 | 1.064  | -7.859  | 1.00 | 0.30  | C |
| ATOM | 1294 | CG1 | VAL | A | 168 | 23.369 | 0.601  | -8.972  | 1.00 | -0.32 | C |
| ATOM | 1295 | CG2 | VAL | A | 168 | 21.011 | 1.257  | -8.464  | 1.00 | -0.32 | C |
| ATOM | 1296 | N   | HIS | A | 169 | 23.470 | -1.994 | -7.089  | 1.00 | -0.42 | N |
| ATOM | 1297 | CA  | HIS | A | 169 | 23.585 | -3.448 | -7.246  | 1.00 | -0.06 | C |
| ATOM | 1298 | C   | HIS | A | 169 | 23.108 | -4.136 | -5.949  | 1.00 | 0.60  | O |
| ATOM | 1299 | O   | HIS | A | 169 | 23.249 | -3.578 | -4.862  | 1.00 | -0.57 | O |
| ATOM | 1300 | CB  | HIS | A | 169 | 25.049 | -3.837 | -7.543  | 1.00 | -0.01 | C |
| ATOM | 1301 | CG  | HIS | A | 169 | 25.644 | -3.196 | -8.775  | 1.00 | 0.19  | C |
| ATOM | 1302 | CD2 | HIS | A | 169 | 25.914 | -3.812 | -9.966  | 1.00 | -0.22 | C |
| ATOM | 1303 | ND1 | HIS | A | 169 | 26.035 | -1.862 | -8.853  | 1.00 | -0.54 | N |
| ATOM | 1304 | CE1 | HIS | A | 169 | 26.524 | -1.691 | -10.083 | 1.00 | 0.16  | C |
| ATOM | 1305 | NE2 | HIS | A | 169 | 26.472 | -2.845 | -10.777 | 1.00 | -0.28 | N |
| ATOM | 1306 | N   | HIS | A | 170 | 22.637 | -5.386 | -6.007  | 1.00 | -0.42 | N |
| ATOM | 1307 | CA  | HIS | A | 170 | 22.641 | -6.212 | -4.790  | 1.00 | 0.02  | C |

|      |      |     |     |   |     |        |         |        |      |       |   |
|------|------|-----|-----|---|-----|--------|---------|--------|------|-------|---|
| ATOM | 1308 | C   | HIS | A | 170 | 24.098 | -6.452  | -4.344 | 1.00 | 0.60  | C |
| ATOM | 1309 | O   | HIS | A | 170 | 24.900 | -6.888  | -5.168 | 1.00 | -0.57 | O |
| ATOM | 1310 | CB  | HIS | A | 170 | 21.934 | -7.556  | -5.041 | 1.00 | -0.05 | C |
| ATOM | 1311 | CG  | HIS | A | 170 | 22.098 | -8.516  | -3.880 | 1.00 | -0.03 | C |
| ATOM | 1312 | CD2 | HIS | A | 170 | 22.705 | -9.734  | -3.939 | 1.00 | 0.13  | C |
| ATOM | 1313 | ND1 | HIS | A | 170 | 21.797 | -8.299  | -2.550 | 1.00 | -0.38 | N |
| ATOM | 1314 | CE1 | HIS | A | 170 | 22.227 | -9.349  | -1.836 | 1.00 | 0.21  | C |
| ATOM | 1315 | NE2 | HIS | A | 170 | 22.802 | -10.248 | -2.639 | 1.00 | -0.57 | N |
| ATOM | 1316 | N   | GLY | A | 171 | 24.466 | -6.222  | -3.074 | 1.00 | -0.42 | N |
| ATOM | 1317 | CA  | GLY | A | 171 | 25.747 | -6.705  | -2.531 | 1.00 | -0.03 | C |
| ATOM | 1318 | C   | GLY | A | 171 | 25.702 | -8.162  | -2.043 | 1.00 | 0.60  | C |
| ATOM | 1319 | O   | GLY | A | 171 | 25.291 | -8.434  | -0.912 | 1.00 | -0.57 | O |
| ATOM | 1320 | N   | ASN | A | 172 | 26.137 | -9.110  | -2.895 | 1.00 | -0.42 | N |
| ATOM | 1321 | CA  | ASN | A | 172 | 26.094 | -10.561 | -2.624 | 1.00 | 0.01  | C |
| ATOM | 1322 | C   | ASN | A | 172 | 27.271 | -11.109 | -1.774 | 1.00 | 0.60  | C |
| ATOM | 1323 | O   | ASN | A | 172 | 27.066 | -11.845 | -0.809 | 1.00 | -0.57 | O |
| ATOM | 1324 | CB  | ASN | A | 172 | 25.955 | -11.319 | -3.970 | 1.00 | -0.20 | C |
| ATOM | 1325 | CG  | ASN | A | 172 | 27.172 | -11.249 | -4.890 | 1.00 | 0.71  | C |
| ATOM | 1326 | ND2 | ASN | A | 172 | 27.314 | -12.175 | -5.830 | 1.00 | -0.92 | N |
| ATOM | 1327 | OD1 | ASN | A | 172 | 28.002 | -10.354 | -4.773 | 1.00 | -0.59 | O |
| ATOM | 1328 | N   | GLY | A | 173 | 28.524 | -10.758 | -2.098 | 1.00 | -0.42 | N |
| ATOM | 1329 | CA  | GLY | A | 173 | 29.740 | -11.372 | -1.524 | 1.00 | -0.03 | C |
| ATOM | 1330 | C   | GLY | A | 173 | 29.913 | -11.195 | -0.008 | 1.00 | 0.60  | C |
| ATOM | 1331 | O   | GLY | A | 173 | 30.518 | -12.018 | 0.684  | 1.00 | -0.57 | O |
| ATOM | 1332 | N   | THR | A | 174 | 29.332 | -10.114 | 0.511  | 1.00 | -0.42 | N |
| ATOM | 1333 | CA  | THR | A | 174 | 29.130 | -9.814  | 1.929  | 1.00 | -0.04 | C |
| ATOM | 1334 | C   | THR | A | 174 | 28.149 | -10.804 | 2.580  | 1.00 | 0.60  | C |
| ATOM | 1335 | O   | THR | A | 174 | 28.498 | -11.501 | 3.535  | 1.00 | -0.57 | O |
| ATOM | 1336 | CB  | THR | A | 174 | 28.543 | -8.392  | 2.035  | 1.00 | 0.37  | C |
| ATOM | 1337 | CG2 | THR | A | 174 | 29.602 | -7.298  | 1.924  | 1.00 | -0.24 | C |
| ATOM | 1338 | OG1 | THR | A | 174 | 27.610 | -8.200  | 0.985  | 1.00 | -0.68 | O |
| ATOM | 1339 | N   | GLN | A | 175 | 26.923 | -10.889 | 2.041  | 1.00 | -0.42 | N |
| ATOM | 1340 | CA  | GLN | A | 175 | 25.867 | -11.831 | 2.441  | 1.00 | -0.00 | C |
| ATOM | 1341 | C   | GLN | A | 175 | 26.415 | -13.271 | 2.524  | 1.00 | 0.60  | C |
| ATOM | 1342 | O   | GLN | A | 175 | 26.228 | -13.953 | 3.537  | 1.00 | -0.57 | O |
| ATOM | 1343 | CB  | GLN | A | 175 | 24.716 | -11.713 | 1.422  | 1.00 | -0.00 | C |
| ATOM | 1344 | CG  | GLN | A | 175 | 23.451 | -12.481 | 1.796  | 1.00 | -0.06 | C |
| ATOM | 1345 | CD  | GLN | A | 175 | 22.670 | -12.804 | 0.564  | 1.00 | 0.70  | C |
| ATOM | 1346 | NE2 | GLN | A | 175 | 23.073 | -13.891 | -0.047 | 1.00 | -0.94 | N |
| ATOM | 1347 | OE1 | GLN | A | 175 | 21.744 | -12.105 | 0.160  | 1.00 | -0.61 | O |
| ATOM | 1348 | N   | HIS | A | 176 | 27.182 | -13.668 | 1.500  | 1.00 | -0.42 | N |
| ATOM | 1349 | CA  | HIS | A | 176 | 27.897 | -14.945 | 1.376  | 1.00 | -0.06 | C |
| ATOM | 1350 | C   | HIS | A | 176 | 28.978 | -15.215 | 2.461  | 1.00 | 0.60  | C |
| ATOM | 1351 | O   | HIS | A | 176 | 29.634 | -16.261 | 2.433  | 1.00 | -0.57 | O |
| ATOM | 1352 | CB  | HIS | A | 176 | 28.479 | -15.041 | -0.049 | 1.00 | -0.01 | C |
| ATOM | 1353 | CG  | HIS | A | 176 | 27.456 | -15.032 | -1.171 | 1.00 | 0.19  | C |
| ATOM | 1354 | CD2 | HIS | A | 176 | 27.727 | -14.776 | -2.484 | 1.00 | -0.22 | C |
| ATOM | 1355 | ND1 | HIS | A | 176 | 26.098 | -15.351 | -1.057 | 1.00 | -0.54 | N |
| ATOM | 1356 | CE1 | HIS | A | 176 | 25.594 | -15.288 | -2.299 | 1.00 | 0.16  | C |
| ATOM | 1357 | NE2 | HIS | A | 176 | 26.553 | -14.957 | -3.178 | 1.00 | -0.28 | N |
| ATOM | 1358 | N   | MET | A | 177 | 29.161 | -14.322 | 3.446  | 1.00 | -0.42 | N |
| ATOM | 1359 | CA  | MET | A | 177 | 30.008 | -14.507 | 4.637  | 1.00 | -0.02 | C |
| ATOM | 1360 | C   | MET | A | 177 | 29.194 | -14.611 | 5.949  | 1.00 | 0.60  | C |
| ATOM | 1361 | O   | MET | A | 177 | 29.777 | -14.892 | 6.998  | 1.00 | -0.57 | O |
| ATOM | 1362 | CB  | MET | A | 177 | 31.024 | -13.346 | 4.690  | 1.00 | 0.03  | C |
| ATOM | 1363 | CG  | MET | A | 177 | 32.117 | -13.463 | 5.761  | 1.00 | 0.00  | C |
| ATOM | 1364 | SD  | MET | A | 177 | 33.213 | -14.898 | 5.611  | 1.00 | -0.27 | S |
| ATOM | 1365 | CE  | MET | A | 177 | 34.221 | -14.598 | 7.085  | 1.00 | -0.05 | C |
| ATOM | 1366 | N   | PHE | A | 178 | 27.871 | -14.385 | 5.901  | 1.00 | -0.42 | N |
| ATOM | 1367 | CA  | PHE | A | 178 | 27.033 | -14.211 | 7.099  | 1.00 | -0.00 | C |
| ATOM | 1368 | C   | PHE | A | 178 | 25.706 | -14.973 | 7.089  | 1.00 | 0.60  | C |
| ATOM | 1369 | O   | PHE | A | 178 | 25.015 | -14.992 | 8.109  | 1.00 | -0.57 | O |
| ATOM | 1370 | CB  | PHE | A | 178 | 26.752 | -12.713 | 7.284  | 1.00 | -0.03 | C |
| ATOM | 1371 | CG  | PHE | A | 178 | 28.016 | -11.898 | 7.439  | 1.00 | 0.01  | C |
| ATOM | 1372 | CD1 | PHE | A | 178 | 28.323 | -10.861 | 6.539  | 1.00 | -0.13 | C |
| ATOM | 1373 | CD2 | PHE | A | 178 | 28.908 | -12.208 | 8.478  | 1.00 | -0.13 | C |
| ATOM | 1374 | CE1 | PHE | A | 178 | 29.535 | -10.159 | 6.664  | 1.00 | -0.17 | C |
| ATOM | 1375 | CE2 | PHE | A | 178 | 30.106 | -11.500 | 8.609  | 1.00 | -0.17 | C |
| ATOM | 1376 | CZ  | PHE | A | 178 | 30.430 | -10.491 | 7.694  | 1.00 | -0.11 | C |
| ATOM | 1377 | N   | GLU | A | 179 | 25.344 | -15.611 | 5.961  | 1.00 | -0.52 | N |
| ATOM | 1378 | CA  | GLU | A | 179 | 24.073 | -16.327 | 5.716  | 1.00 | 0.04  | C |
| ATOM | 1379 | C   | GLU | A | 179 | 23.644 | -17.265 | 6.855  | 1.00 | 0.54  | C |
| ATOM | 1380 | O   | GLU | A | 179 | 22.445 | -17.464 | 7.082  | 1.00 | -0.58 | O |
| ATOM | 1381 | CB  | GLU | A | 179 | 24.172 | -17.096 | 4.379  | 1.00 | 0.06  | C |
| ATOM | 1382 | CG  | GLU | A | 179 | 22.769 | -17.416 | 3.878  | 1.00 | 0.01  | C |
| ATOM | 1383 | CD  | GLU | A | 179 | 22.696 | -17.987 | 2.469  | 1.00 | 0.81  | C |
| ATOM | 1384 | OE1 | GLU | A | 179 | 22.931 | -19.203 | 2.280  | 1.00 | -0.82 | O |

|      |      |     |     |   |     |        |         |        |      |       |   |
|------|------|-----|-----|---|-----|--------|---------|--------|------|-------|---|
| ATOM | 1385 | OE2 | GLU | A | 179 | 22.340 | -17.183 | 1.580  | 1.00 | -0.82 | O |
| ATOM | 1386 | N   | ASP | A | 180 | 24.629 | -17.823 | 7.561  | 1.00 | -0.52 | N |
| ATOM | 1387 | CA  | ASP | A | 180 | 24.475 | -18.682 | 8.726  | 1.00 | 0.04  | C |
| ATOM | 1388 | C   | ASP | A | 180 | 24.313 | -17.979 | 10.084 | 1.00 | 0.54  | C |
| ATOM | 1389 | O   | ASP | A | 180 | 23.774 | -18.633 | 10.982 | 1.00 | -0.58 | O |
| ATOM | 1390 | CB  | ASP | A | 180 | 25.706 | -19.606 | 8.773  | 1.00 | -0.03 | C |
| ATOM | 1391 | CG  | ASP | A | 180 | 27.044 | -18.845 | 8.645  | 1.00 | 0.80  | C |
| ATOM | 1392 | OD1 | ASP | A | 180 | 27.755 | -18.727 | 9.679  | 1.00 | -0.80 | O |
| ATOM | 1393 | OD2 | ASP | A | 180 | 27.352 | -18.409 | 7.503  | 1.00 | -0.80 | O |
| ATOM | 1394 | N   | ASP | A | 181 | 24.737 | -16.717 | 10.279 | 1.00 | -0.52 | N |
| ATOM | 1395 | CA  | ASP | A | 181 | 24.940 | -16.208 | 11.647 | 1.00 | 0.04  | C |
| ATOM | 1396 | C   | ASP | A | 181 | 23.996 | -15.058 | 12.092 | 1.00 | 0.54  | C |
| ATOM | 1397 | O   | ASP | A | 181 | 23.749 | -14.098 | 11.354 | 1.00 | -0.58 | O |
| ATOM | 1398 | CB  | ASP | A | 181 | 26.429 | -15.963 | 11.953 | 1.00 | -0.03 | C |
| ATOM | 1399 | CG  | ASP | A | 181 | 26.928 | -14.524 | 11.771 | 1.00 | 0.80  | C |
| ATOM | 1400 | OD1 | ASP | A | 181 | 26.428 | -13.646 | 12.520 | 1.00 | -0.80 | O |
| ATOM | 1401 | OD2 | ASP | A | 181 | 27.862 | -14.329 | 10.944 | 1.00 | -0.80 | O |
| ATOM | 1402 | N   | PRO | A | 182 | 23.477 | -15.159 | 13.341 | 1.00 | -0.25 | N |
| ATOM | 1403 | CA  | PRO | A | 182 | 22.532 | -14.216 | 13.943 | 1.00 | -0.03 | C |
| ATOM | 1404 | C   | PRO | A | 182 | 23.200 | -12.998 | 14.607 | 1.00 | 0.59  | C |
| ATOM | 1405 | O   | PRO | A | 182 | 22.542 | -12.270 | 15.348 | 1.00 | -0.57 | O |
| ATOM | 1406 | CB  | PRO | A | 182 | 21.771 | -15.054 | 14.977 | 1.00 | -0.01 | C |
| ATOM | 1407 | CG  | PRO | A | 182 | 22.861 | -15.975 | 15.517 | 1.00 | 0.02  | C |
| ATOM | 1408 | CD  | PRO | A | 182 | 23.678 | -16.277 | 14.265 | 1.00 | 0.02  | C |
| ATOM | 1409 | N   | SER | A | 183 | 24.497 | -12.767 | 14.374 | 1.00 | -0.42 | N |
| ATOM | 1410 | CA  | SER | A | 183 | 25.208 | -11.572 | 14.844 | 1.00 | -0.02 | C |
| ATOM | 1411 | C   | SER | A | 183 | 25.441 | -10.555 | 13.717 | 1.00 | 0.60  | C |
| ATOM | 1412 | O   | SER | A | 183 | 25.808 | -9.419  | 14.035 | 1.00 | -0.57 | O |
| ATOM | 1413 | CB  | SER | A | 183 | 26.514 | -11.926 | 15.570 | 1.00 | 0.21  | C |
| ATOM | 1414 | OG  | SER | A | 183 | 26.243 | -12.347 | 16.899 | 1.00 | -0.65 | O |
| ATOM | 1415 | N   | VAL | A | 184 | 25.135 | -10.874 | 12.450 | 1.00 | -0.42 | N |
| ATOM | 1416 | CA  | VAL | A | 184 | 25.346 | -9.945  | 11.328 | 1.00 | -0.09 | C |
| ATOM | 1417 | C   | VAL | A | 184 | 24.094 | -9.784  | 10.464 | 1.00 | 0.60  | C |
| ATOM | 1418 | O   | VAL | A | 184 | 23.858 | -10.550 | 9.526  | 1.00 | -0.57 | O |
| ATOM | 1419 | CB  | VAL | A | 184 | 26.589 | -10.337 | 10.507 | 1.00 | 0.30  | C |
| ATOM | 1420 | CG1 | VAL | A | 184 | 26.862 | -9.268  | 9.442  | 1.00 | -0.32 | C |
| ATOM | 1421 | CG2 | VAL | A | 184 | 27.844 | -10.411 | 11.394 | 1.00 | -0.32 | C |
| ATOM | 1422 | N   | LEU | A | 185 | 23.312 | -8.744  | 10.774 | 1.00 | -0.42 | N |
| ATOM | 1423 | CA  | LEU | A | 185 | 22.114 | -8.443  | 9.998  | 1.00 | -0.05 | C |
| ATOM | 1424 | C   | LEU | A | 185 | 22.480 | -7.635  | 8.742  | 1.00 | 0.60  | C |
| ATOM | 1425 | O   | LEU | A | 185 | 23.161 | -6.610  | 8.827  | 1.00 | -0.57 | O |
| ATOM | 1426 | CB  | LEU | A | 185 | 21.074 | -7.778  | 10.912 | 1.00 | -0.11 | C |
| ATOM | 1427 | CG  | LEU | A | 185 | 19.633 | -7.996  | 10.412 | 1.00 | 0.35  | C |
| ATOM | 1428 | CD1 | LEU | A | 185 | 18.640 | -7.825  | 11.552 | 1.00 | -0.41 | C |
| ATOM | 1429 | CD2 | LEU | A | 185 | 19.211 | -7.043  | 9.296  | 1.00 | -0.41 | C |
| ATOM | 1430 | N   | TYR | A | 186 | 22.011 | -8.105  | 7.580  | 1.00 | -0.42 | N |
| ATOM | 1431 | CA  | TYR | A | 186 | 22.378 | -7.600  | 6.252  | 1.00 | -0.00 | C |
| ATOM | 1432 | C   | TYR | A | 186 | 21.183 | -7.006  | 5.487  | 1.00 | 0.60  | C |
| ATOM | 1433 | O   | TYR | A | 186 | 20.444 | -7.730  | 4.807  | 1.00 | -0.57 | O |
| ATOM | 1434 | CB  | TYR | A | 186 | 23.069 | -8.707  | 5.437  | 1.00 | -0.02 | C |
| ATOM | 1435 | CG  | TYR | A | 186 | 23.800 | -8.129  | 4.245  | 1.00 | -0.00 | C |
| ATOM | 1436 | CD1 | TYR | A | 186 | 23.176 | -7.986  | 2.987  | 1.00 | -0.19 | C |
| ATOM | 1437 | CD2 | TYR | A | 186 | 25.104 | -7.647  | 4.438  | 1.00 | -0.19 | C |
| ATOM | 1438 | CE1 | TYR | A | 186 | 23.852 | -7.324  | 1.943  | 1.00 | -0.23 | C |
| ATOM | 1439 | CE2 | TYR | A | 186 | 25.766 | -6.979  | 3.402  | 1.00 | -0.23 | C |
| ATOM | 1440 | CZ  | TYR | A | 186 | 25.140 | -6.804  | 2.163  | 1.00 | 0.32  | C |
| ATOM | 1441 | OH  | TYR | A | 186 | 25.829 | -6.142  | 1.194  | 1.00 | -0.56 | O |
| ATOM | 1442 | N   | VAL | A | 187 | 20.996 | -5.680  | 5.591  | 1.00 | -0.42 | N |
| ATOM | 1443 | CA  | VAL | A | 187 | 19.855 | -4.994  | 4.948  | 1.00 | -0.09 | C |
| ATOM | 1444 | C   | VAL | A | 187 | 20.284 | -4.333  | 3.642  | 1.00 | 0.60  | C |
| ATOM | 1445 | O   | VAL | A | 187 | 21.057 | -3.380  | 3.682  | 1.00 | -0.57 | O |
| ATOM | 1446 | CB  | VAL | A | 187 | 19.190 | -3.934  | 5.856  | 1.00 | 0.30  | C |
| ATOM | 1447 | CG1 | VAL | A | 187 | 17.829 | -3.517  | 5.271  | 1.00 | -0.32 | C |
| ATOM | 1448 | CG2 | VAL | A | 187 | 18.943 | -4.428  | 7.281  | 1.00 | -0.32 | C |
| ATOM | 1449 | N   | SER | A | 188 | 19.752 | -4.800  | 2.504  | 1.00 | -0.42 | N |
| ATOM | 1450 | CA  | SER | A | 188 | 20.094 | -4.294  | 1.169  | 1.00 | -0.02 | C |
| ATOM | 1451 | C   | SER | A | 188 | 18.914 | -3.647  | 0.427  | 1.00 | 0.60  | C |
| ATOM | 1452 | O   | SER | A | 188 | 17.835 | -4.235  | 0.282  | 1.00 | -0.57 | O |
| ATOM | 1453 | CB  | SER | A | 188 | 20.703 | -5.417  | 0.329  | 1.00 | 0.21  | C |
| ATOM | 1454 | OG  | SER | A | 188 | 21.051 | -4.936  | -0.955 | 1.00 | -0.65 | O |
| ATOM | 1455 | N   | LEU | A | 189 | 19.161 | -2.422  | -0.061 | 1.00 | -0.42 | N |
| ATOM | 1456 | CA  | LEU | A | 189 | 18.203 | -1.576  | -0.780 | 1.00 | -0.05 | C |
| ATOM | 1457 | C   | LEU | A | 189 | 18.691 | -1.339  | -2.221 | 1.00 | 0.60  | C |
| ATOM | 1458 | O   | LEU | A | 189 | 19.287 | -0.300  | -2.536 | 1.00 | -0.57 | O |
| ATOM | 1459 | CB  | LEU | A | 189 | 17.988 | -0.251  | -0.033 | 1.00 | -0.11 | C |
| ATOM | 1460 | CG  | LEU | A | 189 | 17.066 | -0.267  | 1.193  | 1.00 | 0.35  | C |
| ATOM | 1461 | CD1 | LEU | A | 189 | 17.498 | -1.185  | 2.343  | 1.00 | -0.41 | C |

|      |      |     |     |   |     |        |         |         |      |       |   |
|------|------|-----|-----|---|-----|--------|---------|---------|------|-------|---|
| ATOM | 1462 | CD2 | LEU | A | 189 | 16.983 | 1.173   | 1.724   | 1.00 | -0.41 | C |
| ATOM | 1463 | N   | HIS | A | 190 | 18.399 | -2.329  | -3.074  | 1.00 | -0.42 | N |
| ATOM | 1464 | CA  | HIS | A | 190 | 18.993 | -2.536  | -4.391  | 1.00 | -0.06 | C |
| ATOM | 1465 | C   | HIS | A | 190 | 17.949 | -2.553  | -5.525  | 1.00 | 0.60  | O |
| ATOM | 1466 | O   | HIS | A | 190 | 16.736 | -2.484  | -5.306  | 1.00 | -0.57 | O |
| ATOM | 1467 | CB  | HIS | A | 190 | 19.779 | -3.863  | -4.343  | 1.00 | -0.01 | C |
| ATOM | 1468 | CG  | HIS | A | 190 | 18.962 | -5.106  | -4.025  | 1.00 | 0.19  | C |
| ATOM | 1469 | CD2 | HIS | A | 190 | 19.362 | -6.149  | -3.245  | 1.00 | -0.22 | C |
| ATOM | 1470 | ND1 | HIS | A | 190 | 17.690 | -5.403  | -4.507  | 1.00 | -0.54 | N |
| ATOM | 1471 | CE1 | HIS | A | 190 | 17.365 | -6.601  | -3.995  | 1.00 | 0.16  | C |
| ATOM | 1472 | NE2 | HIS | A | 190 | 18.355 | -7.087  | -3.232  | 1.00 | -0.28 | N |
| ATOM | 1473 | N   | ARG | A | 191 | 18.438 | -2.662  | -6.764  | 1.00 | -0.35 | N |
| ATOM | 1474 | CA  | ARG | A | 191 | 17.663 | -3.220  | -7.867  | 1.00 | -0.26 | C |
| ATOM | 1475 | C   | ARG | A | 191 | 17.882 | -4.747  | -7.949  | 1.00 | 0.73  | O |
| ATOM | 1476 | O   | ARG | A | 191 | 18.927 | -5.256  | -7.543  | 1.00 | -0.59 | O |
| ATOM | 1477 | CB  | ARG | A | 191 | 18.066 | -2.533  | -9.181  | 1.00 | -0.00 | C |
| ATOM | 1478 | CG  | ARG | A | 191 | 17.708 | -1.037  | -9.212  | 1.00 | 0.04  | C |
| ATOM | 1479 | CD  | ARG | A | 191 | 17.984 | -0.402  | -10.581 | 1.00 | 0.05  | C |
| ATOM | 1480 | NE  | ARG | A | 191 | 17.120 | -0.984  | -11.624 | 1.00 | -0.53 | N |
| ATOM | 1481 | CZ  | ARG | A | 191 | 17.495 | -1.593  | -12.744 | 1.00 | 0.81  | C |
| ATOM | 1482 | NH1 | ARG | A | 191 | 16.609 | -2.267  | -13.440 | 1.00 | -0.86 | N |
| ATOM | 1483 | NH2 | ARG | A | 191 | 18.734 | -1.571  | -13.183 | 1.00 | -0.86 | N |
| ATOM | 1484 | N   | TYR | A | 192 | 16.894 | -5.457  | -8.520  | 1.00 | -0.42 | N |
| ATOM | 1485 | CA  | TYR | A | 192 | 16.925 | -6.904  | -8.793  | 1.00 | -0.00 | C |
| ATOM | 1486 | C   | TYR | A | 192 | 16.299 | -7.230  | -10.159 | 1.00 | 0.60  | C |
| ATOM | 1487 | O   | TYR | A | 192 | 15.083 | -7.388  | -10.289 | 1.00 | -0.57 | O |
| ATOM | 1488 | CB  | TYR | A | 192 | 16.250 | -7.694  | -7.663  | 1.00 | -0.02 | C |
| ATOM | 1489 | CG  | TYR | A | 192 | 16.235 | -9.198  | -7.899  | 1.00 | -0.00 | C |
| ATOM | 1490 | CD1 | TYR | A | 192 | 15.025 | -9.890  | -8.104  | 1.00 | -0.19 | C |
| ATOM | 1491 | CD2 | TYR | A | 192 | 17.448 | -9.906  | -7.950  | 1.00 | -0.19 | C |
| ATOM | 1492 | CE1 | TYR | A | 192 | 15.042 | -11.274 | -8.369  | 1.00 | -0.23 | C |
| ATOM | 1493 | CE2 | TYR | A | 192 | 17.467 | -11.286 | -8.220  | 1.00 | -0.23 | C |
| ATOM | 1494 | CZ  | TYR | A | 192 | 16.261 | -11.970 | -8.433  | 1.00 | 0.32  | C |
| ATOM | 1495 | OH  | TYR | A | 192 | 16.269 | -13.309 | -8.698  | 1.00 | -0.56 | O |
| ATOM | 1496 | N   | ASP | A | 193 | 17.150 | -7.284  | -11.188 | 1.00 | -0.52 | N |
| ATOM | 1497 | CA  | ASP | A | 193 | 16.789 | -7.610  | -12.571 | 1.00 | 0.04  | C |
| ATOM | 1498 | C   | ASP | A | 193 | 17.888 | -8.468  | -13.208 | 1.00 | 0.54  | C |
| ATOM | 1499 | O   | ASP | A | 193 | 19.078 | -8.249  | -12.987 | 1.00 | -0.58 | O |
| ATOM | 1500 | CB  | ASP | A | 193 | 16.553 | -6.322  | -13.384 | 1.00 | -0.03 | C |
| ATOM | 1501 | CG  | ASP | A | 193 | 16.203 | -6.625  | -14.845 | 1.00 | 0.80  | C |
| ATOM | 1502 | OD1 | ASP | A | 193 | 17.158 | -6.794  | -15.641 | 1.00 | -0.80 | O |
| ATOM | 1503 | OD2 | ASP | A | 193 | 14.992 | -6.709  | -15.142 | 1.00 | -0.80 | O |
| ATOM | 1504 | N   | HIS | A | 194 | 17.476 | -9.449  | -14.010 | 1.00 | -0.42 | N |
| ATOM | 1505 | CA  | HIS | A | 194 | 18.355 | -10.474 | -14.571 | 1.00 | -0.06 | C |
| ATOM | 1506 | C   | HIS | A | 194 | 19.041 | -10.074 | -15.893 | 1.00 | 0.60  | O |
| ATOM | 1507 | O   | HIS | A | 194 | 19.866 | -10.840 | -16.394 | 1.00 | -0.57 | O |
| ATOM | 1508 | CB  | HIS | A | 194 | 17.567 | -11.791 | -14.724 | 1.00 | -0.01 | C |
| ATOM | 1509 | CG  | HIS | A | 194 | 16.667 | -12.103 | -13.549 | 1.00 | 0.19  | C |
| ATOM | 1510 | CD2 | HIS | A | 194 | 16.959 | -12.897 | -12.476 | 1.00 | -0.22 | C |
| ATOM | 1511 | ND1 | HIS | A | 194 | 15.397 | -11.549 | -13.372 | 1.00 | -0.54 | N |
| ATOM | 1512 | CE1 | HIS | A | 194 | 14.958 | -12.016 | -12.195 | 1.00 | 0.16  | C |
| ATOM | 1513 | NE2 | HIS | A | 194 | 15.868 | -12.832 | -11.638 | 1.00 | -0.28 | N |
| ATOM | 1514 | N   | GLY | A | 195 | 18.743 | -8.906  | -16.479 | 1.00 | -0.42 | N |
| ATOM | 1515 | CA  | GLY | A | 195 | 19.271 | -8.439  | -17.769 | 1.00 | -0.03 | C |
| ATOM | 1516 | C   | GLY | A | 195 | 20.779 | -8.160  | -17.771 | 1.00 | 0.60  | O |
| ATOM | 1517 | O   | GLY | A | 195 | 21.191 | -7.001  | -17.743 | 1.00 | -0.57 | O |
| ATOM | 1518 | N   | THR | A | 196 | 21.623 | -9.200  | -17.769 | 1.00 | -0.42 | N |
| ATOM | 1519 | CA  | THR | A | 196 | 23.086 | -9.108  | -17.538 | 1.00 | -0.04 | C |
| ATOM | 1520 | C   | THR | A | 196 | 23.425 | -8.502  | -16.159 | 1.00 | 0.60  | C |
| ATOM | 1521 | O   | THR | A | 196 | 24.440 | -7.833  | -15.963 | 1.00 | -0.57 | O |
| ATOM | 1522 | CB  | THR | A | 196 | 23.838 | -8.403  | -18.695 | 1.00 | 0.37  | C |
| ATOM | 1523 | CG2 | THR | A | 196 | 23.548 | -9.049  | -20.052 | 1.00 | -0.24 | C |
| ATOM | 1524 | OG1 | THR | A | 196 | 23.519 | -7.030  | -18.791 | 1.00 | -0.68 | O |
| ATOM | 1525 | N   | PHE | A | 197 | 22.532 | -8.708  | -15.188 | 1.00 | -0.42 | N |
| ATOM | 1526 | CA  | PHE | A | 197 | 22.394 | -7.834  | -14.029 | 1.00 | -0.00 | C |
| ATOM | 1527 | C   | PHE | A | 197 | 23.354 | -8.599  | -13.058 | 1.00 | 0.60  | C |
| ATOM | 1528 | O   | PHE | A | 197 | 22.949 | -9.534  | -12.353 | 1.00 | -0.57 | O |
| ATOM | 1529 | CB  | PHE | A | 197 | 21.480 | -6.612  | -14.137 | 1.00 | -0.03 | C |
| ATOM | 1530 | CG  | PHE | A | 197 | 22.125 | -5.242  | -14.215 | 1.00 | 0.01  | C |
| ATOM | 1531 | CD1 | PHE | A | 197 | 21.649 | -4.318  | -15.167 | 1.00 | -0.13 | C |
| ATOM | 1532 | CD2 | PHE | A | 197 | 23.089 | -4.838  | -13.270 | 1.00 | -0.13 | C |
| ATOM | 1533 | CE1 | PHE | A | 197 | 22.099 | -2.986  | -15.145 | 1.00 | -0.17 | C |
| ATOM | 1534 | CE2 | PHE | A | 197 | 23.543 | -3.507  | -13.251 | 1.00 | -0.17 | C |
| ATOM | 1535 | CZ  | PHE | A | 197 | 23.030 | -2.579  | -14.175 | 1.00 | -0.11 | C |
| ATOM | 1536 | N   | PHE | A | 198 | 24.654 | -8.247  | -13.027 | 1.00 | -0.42 | N |
| ATOM | 1537 | CA  | PHE | A | 198 | 25.581 | -8.744  | -12.007 | 1.00 | -0.00 | C |
| ATOM | 1538 | C   | PHE | A | 198 | 25.466 | -7.947  | -10.685 | 1.00 | 0.60  | C |

|      |      |     |     |   |     |        |         |         |      |       |   |
|------|------|-----|-----|---|-----|--------|---------|---------|------|-------|---|
| ATOM | 1539 | O   | PHE | A | 198 | 25.460 | -6.715  | -10.720 | 1.00 | -0.57 | O |
| ATOM | 1540 | CB  | PHE | A | 198 | 27.033 | -8.681  | -12.504 | 1.00 | -0.03 | C |
| ATOM | 1541 | CG  | PHE | A | 198 | 27.988 | -9.226  | -11.455 | 1.00 | 0.01  | C |
| ATOM | 1542 | CD1 | PHE | A | 198 | 28.540 | -8.365  | -10.487 | 1.00 | -0.13 | C |
| ATOM | 1543 | CD2 | PHE | A | 198 | 28.216 | -10.612 | -11.365 | 1.00 | -0.13 | C |
| ATOM | 1544 | CE1 | PHE | A | 198 | 29.269 | -8.893  | -9.409  | 1.00 | -0.17 | C |
| ATOM | 1545 | CE2 | PHE | A | 198 | 28.965 | -11.135 | -10.295 | 1.00 | -0.17 | C |
| ATOM | 1546 | CZ  | PHE | A | 198 | 29.480 | -10.277 | -9.309  | 1.00 | -0.11 | C |
| ATOM | 1547 | N   | PRO | A | 199 | 25.413 | -8.604  | -9.509  | 1.00 | -0.25 | N |
| ATOM | 1548 | CA  | PRO | A | 199 | 24.991 | -9.983  | -9.278  | 1.00 | -0.03 | C |
| ATOM | 1549 | C   | PRO | A | 199 | 23.462 | -10.080 | -9.217  | 1.00 | 0.59  | C |
| ATOM | 1550 | O   | PRO | A | 199 | 22.935 | -11.164 | -9.028  | 1.00 | -0.57 | O |
| ATOM | 1551 | CB  | PRO | A | 199 | 25.596 | -10.345 | -7.924  | 1.00 | -0.01 | C |
| ATOM | 1552 | CG  | PRO | A | 199 | 25.443 | -9.039  | -7.155  | 1.00 | 0.02  | C |
| ATOM | 1553 | CD  | PRO | A | 199 | 25.668 | -7.971  | -8.227  | 1.00 | 0.02  | C |
| ATOM | 1554 | N   | MET | A | 200 | 22.754 | -8.957  | -9.390  | 1.00 | -0.42 | N |
| ATOM | 1555 | CA  | MET | A | 200 | 21.312 | -8.791  | -9.218  | 1.00 | -0.02 | C |
| ATOM | 1556 | C   | MET | A | 200 | 20.381 | -9.637  | -10.133 | 1.00 | 0.60  | C |
| ATOM | 1557 | O   | MET | A | 200 | 19.181 | -9.385  | -10.183 | 1.00 | -0.57 | O |
| ATOM | 1558 | CB  | MET | A | 200 | 20.999 | -7.295  | -9.159  | 1.00 | 0.03  | C |
| ATOM | 1559 | CG  | MET | A | 200 | 21.023 | -6.555  | -10.492 | 1.00 | 0.00  | C |
| ATOM | 1560 | SD  | MET | A | 200 | 20.641 | -4.796  | -10.311 | 1.00 | -0.27 | S |
| ATOM | 1561 | CE  | MET | A | 200 | 19.699 | -4.497  | -11.822 | 1.00 | -0.05 | C |
| ATOM | 1562 | N   | GLY | A | 201 | 20.926 | -10.626 | -10.854 | 1.00 | -0.42 | N |
| ATOM | 1563 | CA  | GLY | A | 201 | 20.241 | -11.775 | -11.459 | 1.00 | -0.03 | C |
| ATOM | 1564 | C   | GLY | A | 201 | 20.826 | -13.160 | -11.101 | 1.00 | 0.60  | C |
| ATOM | 1565 | O   | GLY | A | 201 | 20.150 | -14.163 | -11.327 | 1.00 | -0.57 | O |
| ATOM | 1566 | N   | ASP | A | 202 | 22.048 | -13.224 | -10.547 | 1.00 | -0.52 | N |
| ATOM | 1567 | CA  | ASP | A | 202 | 22.677 | -14.362 | -9.840  | 1.00 | 0.04  | C |
| ATOM | 1568 | C   | ASP | A | 202 | 22.060 | -14.540 | -8.438  | 1.00 | 0.54  | C |
| ATOM | 1569 | O   | ASP | A | 202 | 21.769 | -15.657 | -8.016  | 1.00 | -0.58 | O |
| ATOM | 1570 | CB  | ASP | A | 202 | 24.213 | -14.095 | -9.770  | 1.00 | -0.03 | C |
| ATOM | 1571 | CG  | ASP | A | 202 | 25.003 | -14.729 | -8.601  | 1.00 | 0.80  | C |
| ATOM | 1572 | OD1 | ASP | A | 202 | 25.168 | -15.969 | -8.645  | 1.00 | -0.80 | O |
| ATOM | 1573 | OD2 | ASP | A | 202 | 25.458 | -13.960 | -7.709  | 1.00 | -0.80 | O |
| ATOM | 1574 | N   | GLU | A | 203 | 21.804 | -13.414 | -7.759  | 1.00 | -0.52 | N |
| ATOM | 1575 | CA  | GLU | A | 203 | 21.306 | -13.274 | -6.383  | 1.00 | 0.04  | C |
| ATOM | 1576 | C   | GLU | A | 203 | 20.595 | -11.911 | -6.215  | 1.00 | 0.54  | C |
| ATOM | 1577 | O   | GLU | A | 203 | 21.009 | -10.922 | -6.812  | 1.00 | -0.58 | O |
| ATOM | 1578 | CB  | GLU | A | 203 | 22.547 | -13.374 | -5.462  | 1.00 | 0.06  | C |
| ATOM | 1579 | CG  | GLU | A | 203 | 22.357 | -12.981 | -4.006  | 1.00 | 0.01  | C |
| ATOM | 1580 | CD  | GLU | A | 203 | 21.443 | -13.947 | -3.294  | 1.00 | 0.81  | C |
| ATOM | 1581 | OE1 | GLU | A | 203 | 21.910 | -14.644 | -2.379  | 1.00 | -0.82 | O |
| ATOM | 1582 | OE2 | GLU | A | 203 | 20.246 | -13.943 | -3.630  | 1.00 | -0.82 | O |
| ATOM | 1583 | N   | GLY | A | 204 | 19.531 | -11.828 | -5.394  | 1.00 | -0.42 | N |
| ATOM | 1584 | CA  | GLY | A | 204 | 18.859 | -10.549 | -5.050  | 1.00 | -0.03 | C |
| ATOM | 1585 | C   | GLY | A | 204 | 17.301 | -10.529 | -4.930  | 1.00 | 0.60  | C |
| ATOM | 1586 | O   | GLY | A | 204 | 16.701 | -9.488  | -4.631  | 1.00 | -0.57 | O |
| ATOM | 1587 | N   | ALA | A | 205 | 16.652 | -11.697 | -5.129  | 1.00 | -0.42 | N |
| ATOM | 1588 | CA  | ALA | A | 205 | 15.209 | -11.799 | -4.895  | 1.00 | 0.03  | C |
| ATOM | 1589 | C   | ALA | A | 205 | 14.796 | -11.407 | -3.457  | 1.00 | 0.60  | C |
| ATOM | 1590 | O   | ALA | A | 205 | 15.447 | -11.829 | -2.503  | 1.00 | -0.57 | O |
| ATOM | 1591 | CB  | ALA | A | 205 | 14.766 | -13.241 | -5.168  | 1.00 | -0.18 | C |
| ATOM | 1592 | N   | SER | A | 206 | 13.666 | -10.703 | -3.265  | 1.00 | -0.42 | N |
| ATOM | 1593 | CA  | SER | A | 206 | 13.167 | -10.307 | -1.925  | 1.00 | -0.02 | C |
| ATOM | 1594 | C   | SER | A | 206 | 12.725 | -11.484 | -1.010  | 1.00 | 0.60  | C |
| ATOM | 1595 | O   | SER | A | 206 | 12.237 | -11.295 | 0.103   | 1.00 | -0.57 | O |
| ATOM | 1596 | CB  | SER | A | 206 | 12.067 | -9.245  | -2.077  | 1.00 | 0.21  | C |
| ATOM | 1597 | OG  | SER | A | 206 | 11.919 | -8.464  | -0.905  | 1.00 | -0.65 | O |
| ATOM | 1598 | N   | SER | A | 207 | 12.912 | -12.719 | -1.481  | 1.00 | -0.42 | N |
| ATOM | 1599 | CA  | SER | A | 207 | 12.734 | -13.970 | -0.744  | 1.00 | -0.02 | C |
| ATOM | 1600 | C   | SER | A | 207 | 14.033 | -14.476 | -0.082  | 1.00 | 0.60  | C |
| ATOM | 1601 | O   | SER | A | 207 | 13.962 | -15.280 | 0.849   | 1.00 | -0.57 | O |
| ATOM | 1602 | CB  | SER | A | 207 | 12.241 | -15.032 | -1.733  | 1.00 | 0.21  | C |
| ATOM | 1603 | OG  | SER | A | 207 | 13.098 | -15.104 | -2.862  | 1.00 | -0.65 | O |
| ATOM | 1604 | N   | GLN | A | 208 | 15.215 | -14.034 | -0.547  | 1.00 | -0.42 | N |
| ATOM | 1605 | CA  | GLN | A | 208 | 16.500 | -14.417 | 0.048   | 1.00 | -0.00 | C |
| ATOM | 1606 | C   | GLN | A | 208 | 16.647 | -13.750 | 1.423   | 1.00 | 0.60  | C |
| ATOM | 1607 | O   | GLN | A | 208 | 16.709 | -12.519 | 1.523   | 1.00 | -0.57 | O |
| ATOM | 1608 | CB  | GLN | A | 208 | 17.649 | -14.078 | -0.918  | 1.00 | -0.00 | C |
| ATOM | 1609 | CG  | GLN | A | 208 | 19.062 | -14.074 | -0.316  | 1.00 | -0.06 | C |
| ATOM | 1610 | CD  | GLN | A | 208 | 19.554 | -15.385 | 0.266   | 1.00 | 0.70  | C |
| ATOM | 1611 | NE2 | GLN | A | 208 | 20.709 | -15.856 | -0.188  | 1.00 | -0.94 | N |
| ATOM | 1612 | OE1 | GLN | A | 208 | 18.928 | -15.982 | 1.147   | 1.00 | -0.61 | O |
| ATOM | 1613 | N   | ILE | A | 209 | 16.699 | -14.586 | 2.464   | 1.00 | -0.42 | N |
| ATOM | 1614 | CA  | ILE | A | 209 | 16.546 | -14.188 | 3.863   | 1.00 | -0.06 | C |
| ATOM | 1615 | C   | ILE | A | 209 | 17.558 | -14.856 | 4.827   | 1.00 | 0.60  | C |

|      |      |     |     |   |     |        |         |        |      |       |   |
|------|------|-----|-----|---|-----|--------|---------|--------|------|-------|---|
| ATOM | 1616 | O   | ILE | A | 209 | 17.641 | -14.486 | 6.001  | 1.00 | -0.57 | O |
| ATOM | 1617 | CB  | ILE | A | 209 | 15.063 | -14.428 | 4.241  | 1.00 | 0.13  | C |
| ATOM | 1618 | CG1 | ILE | A | 209 | 14.622 | -13.496 | 5.386  | 1.00 | -0.04 | C |
| ATOM | 1619 | CG2 | ILE | A | 209 | 14.785 | -15.921 | 4.510  | 1.00 | -0.32 | C |
| ATOM | 1620 | CD1 | ILE | A | 209 | 13.133 | -13.603 | 5.739  | 1.00 | -0.07 | C |
| ATOM | 1621 | N   | GLY | A | 210 | 18.357 | -15.816 | 4.340  | 1.00 | -0.42 | N |
| ATOM | 1622 | CA  | GLY | A | 210 | 19.374 | -16.534 | 5.126  | 1.00 | -0.03 | C |
| ATOM | 1623 | C   | GLY | A | 210 | 19.088 | -18.022 | 5.387  | 1.00 | 0.60  | C |
| ATOM | 1624 | O   | GLY | A | 210 | 18.047 | -18.556 | 4.978  | 1.00 | -0.57 | O |
| ATOM | 1625 | N   | ARG | A | 211 | 20.009 | -18.691 | 6.093  | 1.00 | -0.35 | N |
| ATOM | 1626 | CA  | ARG | A | 211 | 19.971 | -20.125 | 6.446  | 1.00 | -0.26 | C |
| ATOM | 1627 | C   | ARG | A | 211 | 20.375 | -20.342 | 7.924  | 1.00 | 0.73  | C |
| ATOM | 1628 | O   | ARG | A | 211 | 20.534 | -19.375 | 8.665  | 1.00 | -0.59 | O |
| ATOM | 1629 | CB  | ARG | A | 211 | 20.908 | -20.946 | 5.533  | 1.00 | -0.00 | C |
| ATOM | 1630 | CG  | ARG | A | 211 | 20.821 | -20.677 | 4.029  | 1.00 | 0.04  | C |
| ATOM | 1631 | CD  | ARG | A | 211 | 19.529 | -21.052 | 3.302  | 1.00 | 0.05  | C |
| ATOM | 1632 | NE  | ARG | A | 211 | 19.638 | -20.551 | 1.923  | 1.00 | -0.53 | N |
| ATOM | 1633 | CZ  | ARG | A | 211 | 19.435 | -19.295 | 1.536  | 1.00 | 0.81  | C |
| ATOM | 1634 | NH1 | ARG | A | 211 | 20.019 | -18.843 | 0.453  | 1.00 | -0.86 | N |
| ATOM | 1635 | NH2 | ARG | A | 211 | 18.679 | -18.456 | 2.200  | 1.00 | -0.86 | N |
| ATOM | 1636 | N   | ALA | A | 212 | 20.544 | -21.602 | 8.352  | 1.00 | -0.42 | N |
| ATOM | 1637 | CA  | ALA | A | 212 | 20.919 | -22.045 | 9.705  | 1.00 | 0.03  | C |
| ATOM | 1638 | C   | ALA | A | 212 | 20.261 | -21.259 | 10.865 | 1.00 | 0.60  | C |
| ATOM | 1639 | O   | ALA | A | 212 | 19.184 | -21.650 | 11.314 | 1.00 | -0.57 | O |
| ATOM | 1640 | CB  | ALA | A | 212 | 22.451 | -22.122 | 9.807  | 1.00 | -0.18 | C |
| ATOM | 1641 | N   | ALA | A | 213 | 20.886 | -20.166 | 11.333 | 1.00 | -0.42 | N |
| ATOM | 1642 | CA  | ALA | A | 213 | 20.348 | -19.246 | 12.347 | 1.00 | 0.03  | C |
| ATOM | 1643 | C   | ALA | A | 213 | 20.334 | -17.763 | 11.903 | 1.00 | 0.60  | C |
| ATOM | 1644 | O   | ALA | A | 213 | 19.727 | -16.933 | 12.577 | 1.00 | -0.57 | O |
| ATOM | 1645 | CB  | ALA | A | 213 | 21.151 | -19.431 | 13.639 | 1.00 | -0.18 | C |
| ATOM | 1646 | N   | GLY | A | 214 | 20.940 | -17.443 | 10.749 | 1.00 | -0.42 | N |
| ATOM | 1647 | CA  | GLY | A | 214 | 20.887 | -16.138 | 10.080 | 1.00 | -0.03 | C |
| ATOM | 1648 | C   | GLY | A | 214 | 19.660 | -15.988 | 9.164  | 1.00 | 0.60  | C |
| ATOM | 1649 | O   | GLY | A | 214 | 19.386 | -14.896 | 8.667  | 1.00 | -0.57 | O |
| ATOM | 1650 | N   | THR | A | 215 | 18.879 | -17.058 | 8.969  | 1.00 | -0.42 | N |
| ATOM | 1651 | CA  | THR | A | 215 | 17.553 | -17.027 | 8.334  | 1.00 | -0.04 | C |
| ATOM | 1652 | C   | THR | A | 215 | 16.582 | -16.065 | 9.059  | 1.00 | 0.60  | C |
| ATOM | 1653 | O   | THR | A | 215 | 16.135 | -16.309 | 10.180 | 1.00 | -0.57 | O |
| ATOM | 1654 | CB  | THR | A | 215 | 17.017 | -18.457 | 8.115  | 1.00 | 0.37  | C |
| ATOM | 1655 | CG2 | THR | A | 215 | 16.310 | -19.136 | 9.288  | 1.00 | -0.24 | C |
| ATOM | 1656 | OG1 | THR | A | 215 | 16.182 | -18.493 | 6.981  | 1.00 | -0.68 | O |
| ATOM | 1657 | N   | GLY | A | 216 | 16.341 | -14.908 | 8.429  | 1.00 | -0.42 | N |
| ATOM | 1658 | CA  | GLY | A | 216 | 15.660 | -13.739 | 9.012  | 1.00 | -0.03 | C |
| ATOM | 1659 | C   | GLY | A | 216 | 16.530 | -12.468 | 9.043  | 1.00 | 0.60  | C |
| ATOM | 1660 | O   | GLY | A | 216 | 16.002 | -11.366 | 9.162  | 1.00 | -0.57 | O |
| ATOM | 1661 | N   | PHE | A | 217 | 17.855 | -12.630 | 8.941  | 1.00 | -0.42 | N |
| ATOM | 1662 | CA  | PHE | A | 217 | 18.853 | -11.582 | 9.129  | 1.00 | -0.00 | C |
| ATOM | 1663 | C   | PHE | A | 217 | 19.462 | -11.096 | 7.800  | 1.00 | 0.60  | C |
| ATOM | 1664 | O   | PHE | A | 217 | 19.942 | -9.964  | 7.750  | 1.00 | -0.57 | O |
| ATOM | 1665 | CB  | PHE | A | 217 | 19.952 | -12.044 | 10.111 | 1.00 | -0.03 | C |
| ATOM | 1666 | CG  | PHE | A | 217 | 19.504 | -12.387 | 11.529 | 1.00 | 0.01  | C |
| ATOM | 1667 | CD1 | PHE | A | 217 | 19.856 | -11.547 | 12.607 | 1.00 | -0.13 | C |
| ATOM | 1668 | CD2 | PHE | A | 217 | 18.782 | -13.569 | 11.794 | 1.00 | -0.13 | C |
| ATOM | 1669 | CE1 | PHE | A | 217 | 19.488 | -11.886 | 13.924 | 1.00 | -0.17 | C |
| ATOM | 1670 | CE2 | PHE | A | 217 | 18.423 | -13.911 | 13.108 | 1.00 | -0.17 | C |
| ATOM | 1671 | CZ  | PHE | A | 217 | 18.773 | -13.069 | 14.176 | 1.00 | -0.11 | C |
| ATOM | 1672 | N   | THR | A | 218 | 19.400 | -11.857 | 6.694  | 1.00 | -0.42 | N |
| ATOM | 1673 | CA  | THR | A | 218 | 19.538 | -11.219 | 5.369  | 1.00 | -0.04 | C |
| ATOM | 1674 | C   | THR | A | 218 | 18.200 | -10.584 | 4.971  | 1.00 | 0.60  | C |
| ATOM | 1675 | O   | THR | A | 218 | 17.153 | -11.212 | 5.101  | 1.00 | -0.57 | O |
| ATOM | 1676 | CB  | THR | A | 218 | 20.002 | -12.215 | 4.299  | 1.00 | 0.37  | C |
| ATOM | 1677 | CG2 | THR | A | 218 | 19.953 | -11.661 | 2.879  | 1.00 | -0.24 | C |
| ATOM | 1678 | OG1 | THR | A | 218 | 21.341 | -12.580 | 4.540  | 1.00 | -0.68 | O |
| ATOM | 1679 | N   | VAL | A | 219 | 18.228 | -9.347  | 4.465  | 1.00 | -0.42 | N |
| ATOM | 1680 | CA  | VAL | A | 219 | 17.031 | -8.619  | 4.038  | 1.00 | -0.09 | C |
| ATOM | 1681 | C   | VAL | A | 219 | 17.274 | -8.003  | 2.653  | 1.00 | 0.60  | C |
| ATOM | 1682 | O   | VAL | A | 219 | 18.037 | -7.045  | 2.500  | 1.00 | -0.57 | O |
| ATOM | 1683 | CB  | VAL | A | 219 | 16.610 | -7.574  | 5.101  | 1.00 | 0.30  | C |
| ATOM | 1684 | CG1 | VAL | A | 219 | 15.250 | -6.956  | 4.760  | 1.00 | -0.32 | C |
| ATOM | 1685 | CG2 | VAL | A | 219 | 16.508 | -8.162  | 6.521  | 1.00 | -0.32 | C |
| ATOM | 1686 | N   | ASN | A | 220 | 16.600 | -8.568  | 1.642  | 1.00 | -0.42 | N |
| ATOM | 1687 | CA  | ASN | A | 220 | 16.646 | -8.132  | 0.242  | 1.00 | 0.01  | C |
| ATOM | 1688 | C   | ASN | A | 220 | 15.421 | -7.250  | -0.095 | 1.00 | 0.60  | C |
| ATOM | 1689 | O   | ASN | A | 220 | 14.286 | -7.742  | -0.069 | 1.00 | -0.57 | O |
| ATOM | 1690 | CB  | ASN | A | 220 | 16.668 | -9.387  | -0.664 | 1.00 | -0.20 | C |
| ATOM | 1691 | CG  | ASN | A | 220 | 18.053 | -9.979  | -0.869 | 1.00 | 0.71  | C |
| ATOM | 1692 | ND2 | ASN | A | 220 | 18.482 | -10.892 | -0.015 | 1.00 | -0.92 | N |

|      |      |     |     |   |     |        |        |         |      |       |   |
|------|------|-----|-----|---|-----|--------|--------|---------|------|-------|---|
| ATOM | 1693 | OD1 | ASN | A | 220 | 18.740 | -9.596 | -1.811  | 1.00 | -0.59 | O |
| ATOM | 1694 | N   | VAL | A | 221 | 15.633 | -5.975 | -0.465  | 1.00 | -0.42 | N |
| ATOM | 1695 | CA  | VAL | A | 221 | 14.566 | -5.065 | -0.926  | 1.00 | -0.09 | C |
| ATOM | 1696 | C   | VAL | A | 221 | 14.773 | -4.683 | -2.394  | 1.00 | 0.60  | O |
| ATOM | 1697 | O   | VAL | A | 221 | 15.665 | -3.897 | -2.715  | 1.00 | -0.57 | O |
| ATOM | 1698 | CB  | VAL | A | 221 | 14.467 | -3.791 | -0.067  | 1.00 | 0.30  | C |
| ATOM | 1699 | CG1 | VAL | A | 221 | 13.136 | -3.080 | -0.350  | 1.00 | -0.32 | C |
| ATOM | 1700 | CG2 | VAL | A | 221 | 14.521 | -4.086 | 1.433   | 1.00 | -0.32 | C |
| ATOM | 1701 | N   | ALA | A | 222 | 13.921 | -5.250 | -3.260  | 1.00 | -0.42 | N |
| ATOM | 1702 | CA  | ALA | A | 222 | 14.068 | -5.327 | -4.721  | 1.00 | 0.03  | C |
| ATOM | 1703 | C   | ALA | A | 222 | 13.362 | -4.207 | -5.528  | 1.00 | 0.60  | C |
| ATOM | 1704 | O   | ALA | A | 222 | 12.329 | -4.431 | -6.164  | 1.00 | -0.57 | O |
| ATOM | 1705 | CB  | ALA | A | 222 | 13.579 | -6.722 | -5.141  | 1.00 | -0.18 | C |
| ATOM | 1706 | N   | TRP | A | 223 | 13.935 | -2.999 | -5.548  | 1.00 | -0.42 | N |
| ATOM | 1707 | CA  | TRP | A | 223 | 13.397 | -1.831 | -6.274  | 1.00 | -0.03 | C |
| ATOM | 1708 | C   | TRP | A | 223 | 13.723 | -1.855 | -7.783  | 1.00 | 0.60  | C |
| ATOM | 1709 | O   | TRP | A | 223 | 14.250 | -0.886 | -8.327  | 1.00 | -0.57 | O |
| ATOM | 1710 | CB  | TRP | A | 223 | 13.885 | -0.538 | -5.596  | 1.00 | -0.01 | C |
| ATOM | 1711 | CG  | TRP | A | 223 | 13.239 | -0.277 | -4.276  | 1.00 | -0.14 | C |
| ATOM | 1712 | CD1 | TRP | A | 223 | 13.752 | -0.568 | -3.060  | 1.00 | -0.16 | C |
| ATOM | 1713 | CD2 | TRP | A | 223 | 11.905 | 0.263  | -4.035  | 1.00 | 0.12  | C |
| ATOM | 1714 | CE2 | TRP | A | 223 | 11.649 | 0.216  | -2.634  | 1.00 | 0.14  | C |
| ATOM | 1715 | CE3 | TRP | A | 223 | 10.876 | 0.764  | -4.866  | 1.00 | -0.24 | C |
| ATOM | 1716 | NE1 | TRP | A | 223 | 12.829 | -0.249 | -2.085  | 1.00 | -0.34 | N |
| ATOM | 1717 | CZ2 | TRP | A | 223 | 10.412 | 0.596  | -2.089  | 1.00 | -0.26 | C |
| ATOM | 1718 | CZ3 | TRP | A | 223 | 9.652  | 1.193  | -4.322  | 1.00 | -0.20 | C |
| ATOM | 1719 | CH2 | TRP | A | 223 | 9.415  | 1.103  | -2.939  | 1.00 | -0.11 | C |
| ATOM | 1720 | N   | ASN | A | 224 | 13.485 | -2.974 | -8.478  | 1.00 | -0.42 | N |
| ATOM | 1721 | CA  | ASN | A | 224 | 14.059 | -3.200 | -9.814  | 1.00 | 0.01  | C |
| ATOM | 1722 | C   | ASN | A | 224 | 13.658 | -2.193 | -10.925 | 1.00 | 0.60  | C |
| ATOM | 1723 | O   | ASN | A | 224 | 14.494 | -1.861 | -11.771 | 1.00 | -0.57 | O |
| ATOM | 1724 | CB  | ASN | A | 224 | 13.829 | -4.655 | -10.236 | 1.00 | -0.20 | C |
| ATOM | 1725 | CG  | ASN | A | 224 | 12.497 | -4.928 | -10.923 | 1.00 | 0.71  | C |
| ATOM | 1726 | ND2 | ASN | A | 224 | 12.516 | -5.794 | -11.922 | 1.00 | -0.92 | N |
| ATOM | 1727 | OD1 | ASN | A | 224 | 11.469 | -4.355 | -10.582 | 1.00 | -0.59 | O |
| ATOM | 1728 | N   | GLY | A | 225 | 12.417 | -1.689 | -10.934 | 1.00 | -0.42 | N |
| ATOM | 1729 | CA  | GLY | A | 225 | 11.963 | -0.614 | -11.827 | 1.00 | -0.03 | C |
| ATOM | 1730 | C   | GLY | A | 225 | 12.920 | 0.599  | -11.861 | 1.00 | 0.60  | O |
| ATOM | 1731 | O   | GLY | A | 225 | 13.254 | 1.116  | -10.796 | 1.00 | -0.57 | O |
| ATOM | 1732 | N   | PRO | A | 226 | 13.384 | 1.063  | -13.041 | 1.00 | -0.25 | N |
| ATOM | 1733 | CA  | PRO | A | 226 | 14.149 | 2.311  | -13.182 | 1.00 | -0.03 | C |
| ATOM | 1734 | C   | PRO | A | 226 | 13.433 | 3.572  | -12.659 | 1.00 | 0.59  | C |
| ATOM | 1735 | O   | PRO | A | 226 | 12.299 | 3.520  | -12.188 | 1.00 | -0.57 | O |
| ATOM | 1736 | CB  | PRO | A | 226 | 14.475 | 2.431  | -14.678 | 1.00 | -0.01 | C |
| ATOM | 1737 | CG  | PRO | A | 226 | 14.424 | 0.988  | -15.173 | 1.00 | 0.02  | C |
| ATOM | 1738 | CD  | PRO | A | 226 | 13.313 | 0.376  | -14.322 | 1.00 | 0.02  | C |
| ATOM | 1739 | N   | ARG | A | 227 | 14.091 | 4.730  | -12.760 | 1.00 | -0.35 | N |
| ATOM | 1740 | CA  | ARG | A | 227 | 13.568 | 6.083  | -12.481 | 1.00 | -0.26 | C |
| ATOM | 1741 | C   | ARG | A | 227 | 13.253 | 6.397  | -10.995 | 1.00 | 0.73  | C |
| ATOM | 1742 | O   | ARG | A | 227 | 13.178 | 7.581  | -10.646 | 1.00 | -0.59 | O |
| ATOM | 1743 | CB  | ARG | A | 227 | 12.389 | 6.387  | -13.443 | 1.00 | -0.00 | C |
| ATOM | 1744 | CG  | ARG | A | 227 | 11.805 | 7.809  | -13.398 | 1.00 | 0.04  | C |
| ATOM | 1745 | CD  | ARG | A | 227 | 12.851 | 8.892  | -13.695 | 1.00 | 0.05  | C |
| ATOM | 1746 | NE  | ARG | A | 227 | 12.341 | 10.252 | -13.453 | 1.00 | -0.53 | N |
| ATOM | 1747 | CZ  | ARG | A | 227 | 12.189 | 10.843 | -12.267 | 1.00 | 0.81  | C |
| ATOM | 1748 | NH1 | ARG | A | 227 | 11.841 | 12.113 | -12.194 | 1.00 | -0.86 | N |
| ATOM | 1749 | NH2 | ARG | A | 227 | 12.379 | 10.225 | -11.117 | 1.00 | -0.86 | N |
| ATOM | 1750 | N   | MET | A | 228 | 13.144 | 5.366  | -10.141 | 1.00 | -0.42 | N |
| ATOM | 1751 | CA  | MET | A | 228 | 13.014 | 5.425  | -8.676  | 1.00 | -0.02 | C |
| ATOM | 1752 | C   | MET | A | 228 | 14.113 | 6.275  | -8.015  | 1.00 | 0.60  | C |
| ATOM | 1753 | O   | MET | A | 228 | 15.266 | 6.275  | -8.464  | 1.00 | -0.57 | O |
| ATOM | 1754 | CB  | MET | A | 228 | 13.073 | 4.002  | -8.094  | 1.00 | 0.03  | C |
| ATOM | 1755 | CG  | MET | A | 228 | 11.997 | 3.037  | -8.610  | 1.00 | 0.00  | C |
| ATOM | 1756 | SD  | MET | A | 228 | 10.274 | 3.463  | -8.248  | 1.00 | -0.27 | S |
| ATOM | 1757 | CE  | MET | A | 228 | 9.798  | 4.275  | -9.798  | 1.00 | -0.05 | C |
| ATOM | 1758 | N   | GLY | A | 229 | 13.751 | 7.021  | -6.960  | 1.00 | -0.42 | N |
| ATOM | 1759 | CA  | GLY | A | 229 | 14.579 | 8.121  | -6.464  | 1.00 | -0.03 | C |
| ATOM | 1760 | C   | GLY | A | 229 | 14.245 | 8.682  | -5.078  | 1.00 | 0.60  | C |
| ATOM | 1761 | O   | GLY | A | 229 | 13.508 | 8.068  | -4.307  | 1.00 | -0.57 | O |
| ATOM | 1762 | N   | ASP | A | 230 | 14.825 | 9.862  | -4.795  | 1.00 | -0.52 | N |
| ATOM | 1763 | CA  | ASP | A | 230 | 15.043 | 10.454 | -3.457  | 1.00 | 0.04  | C |
| ATOM | 1764 | C   | ASP | A | 230 | 13.949 | 10.167 | -2.426  | 1.00 | 0.54  | C |
| ATOM | 1765 | O   | ASP | A | 230 | 14.169 | 9.380  | -1.510  | 1.00 | -0.58 | O |
| ATOM | 1766 | CB  | ASP | A | 230 | 15.273 | 11.980 | -3.531  | 1.00 | -0.03 | C |
| ATOM | 1767 | CG  | ASP | A | 230 | 16.187 | 12.415 | -4.663  | 1.00 | 0.80  | C |
| ATOM | 1768 | OD1 | ASP | A | 230 | 15.661 | 12.588 | -5.781  | 1.00 | -0.80 | O |
| ATOM | 1769 | OD2 | ASP | A | 230 | 17.409 | 12.557 | -4.433  | 1.00 | -0.80 | O |



|      |      |     |     |   |     |        |        |        |      |       |   |
|------|------|-----|-----|---|-----|--------|--------|--------|------|-------|---|
| ATOM | 1770 | N   | ALA | A | 231 | 12.784 | 10.812 | -2.555 | 1.00 | -0.42 | N |
| ATOM | 1771 | CA  | ALA | A | 231 | 11.714 | 10.755 | -1.558 | 1.00 | 0.03  | C |
| ATOM | 1772 | C   | ALA | A | 231 | 11.172 | 9.332  | -1.347 | 1.00 | 0.60  | C |
| ATOM | 1773 | O   | ALA | A | 231 | 10.952 | 8.919  | -0.208 | 1.00 | -0.57 | O |
| ATOM | 1774 | CB  | ALA | A | 231 | 10.592 | 11.707 | -1.985 | 1.00 | -0.18 | C |
| ATOM | 1775 | N   | ASP | A | 232 | 10.993 | 8.582  | -2.441 | 1.00 | -0.52 | N |
| ATOM | 1776 | CA  | ASP | A | 232 | 10.538 | 7.194  | -2.429 | 1.00 | 0.04  | C |
| ATOM | 1777 | C   | ASP | A | 232 | 11.565 | 6.294  | -1.733 | 1.00 | 0.54  | C |
| ATOM | 1778 | O   | ASP | A | 232 | 11.247 | 5.634  | -0.742 | 1.00 | -0.58 | O |
| ATOM | 1779 | CB  | ASP | A | 232 | 10.254 | 6.753  | -3.880 | 1.00 | -0.03 | C |
| ATOM | 1780 | CG  | ASP | A | 232 | 9.664  | 5.340  | -4.014 | 1.00 | 0.80  | C |
| ATOM | 1781 | OD1 | ASP | A | 232 | 8.983  | 4.902  | -3.059 | 1.00 | -0.80 | O |
| ATOM | 1782 | OD2 | ASP | A | 232 | 9.896  | 4.731  | -5.082 | 1.00 | -0.80 | O |
| ATOM | 1783 | N   | TYR | A | 233 | 12.825 | 6.337  | -2.188 | 1.00 | -0.42 | N |
| ATOM | 1784 | CA  | TYR | A | 233 | 13.919 | 5.562  | -1.593 | 1.00 | -0.00 | C |
| ATOM | 1785 | C   | TYR | A | 233 | 14.124 | 5.911  | -0.106 | 1.00 | 0.60  | C |
| ATOM | 1786 | O   | TYR | A | 233 | 14.304 | 5.013  | 0.717  | 1.00 | -0.57 | O |
| ATOM | 1787 | CB  | TYR | A | 233 | 15.203 | 5.762  | -2.414 | 1.00 | -0.02 | C |
| ATOM | 1788 | CG  | TYR | A | 233 | 16.315 | 4.764  | -2.121 | 1.00 | -0.00 | C |
| ATOM | 1789 | CD1 | TYR | A | 233 | 17.265 | 5.026  | -1.116 | 1.00 | -0.19 | C |
| ATOM | 1790 | CD2 | TYR | A | 233 | 16.420 | 3.577  | -2.880 | 1.00 | -0.19 | C |
| ATOM | 1791 | CE1 | TYR | A | 233 | 18.327 | 4.129  | -0.894 | 1.00 | -0.23 | C |
| ATOM | 1792 | CE2 | TYR | A | 233 | 17.482 | 2.680  | -2.652 | 1.00 | -0.23 | C |
| ATOM | 1793 | CZ  | TYR | A | 233 | 18.444 | 2.961  | -1.668 | 1.00 | 0.32  | C |
| ATOM | 1794 | OH  | TYR | A | 233 | 19.505 | 2.128  | -1.456 | 1.00 | -0.56 | O |
| ATOM | 1795 | N   | LEU | A | 234 | 14.031 | 7.195  | 0.265  | 1.00 | -0.42 | N |
| ATOM | 1796 | CA  | LEU | A | 234 | 14.059 | 7.662  | 1.654  | 1.00 | -0.05 | C |
| ATOM | 1797 | C   | LEU | A | 234 | 12.882 | 7.108  | 2.483  | 1.00 | 0.60  | C |
| ATOM | 1798 | O   | LEU | A | 234 | 13.091 | 6.578  | 3.579  | 1.00 | -0.57 | O |
| ATOM | 1799 | CB  | LEU | A | 234 | 14.042 | 9.200  | 1.620  | 1.00 | -0.11 | C |
| ATOM | 1800 | CG  | LEU | A | 234 | 14.108 | 9.890  | 2.991  | 1.00 | 0.35  | C |
| ATOM | 1801 | CD1 | LEU | A | 234 | 15.507 | 9.786  | 3.604  | 1.00 | -0.41 | C |
| ATOM | 1802 | CD2 | LEU | A | 234 | 13.755 | 11.367 | 2.824  | 1.00 | -0.41 | C |
| ATOM | 1803 | N   | ALA | A | 235 | 11.648 | 7.210  | 1.971  | 1.00 | -0.42 | N |
| ATOM | 1804 | CA  | ALA | A | 235 | 10.467 | 6.658  | 2.636  | 1.00 | 0.03  | C |
| ATOM | 1805 | C   | ALA | A | 235 | 10.570 | 5.131  | 2.802  | 1.00 | 0.60  | C |
| ATOM | 1806 | O   | ALA | A | 235 | 10.335 | 4.610  | 3.894  | 1.00 | -0.57 | O |
| ATOM | 1807 | CB  | ALA | A | 235 | 9.216  | 7.053  | 1.843  | 1.00 | -0.18 | C |
| ATOM | 1808 | N   | ALA | A | 236 | 10.988 | 4.430  | 1.741  | 1.00 | -0.42 | N |
| ATOM | 1809 | CA  | ALA | A | 236 | 11.243 | 2.994  | 1.735  | 1.00 | 0.03  | C |
| ATOM | 1810 | C   | ALA | A | 236 | 12.291 | 2.586  | 2.780  | 1.00 | 0.60  | C |
| ATOM | 1811 | O   | ALA | A | 236 | 12.052 | 1.642  | 3.533  | 1.00 | -0.57 | O |
| ATOM | 1812 | CB  | ALA | A | 236 | 11.685 | 2.577  | 0.332  | 1.00 | -0.18 | C |
| ATOM | 1813 | N   | TRP | A | 237 | 13.404 | 3.328  | 2.883  | 1.00 | -0.42 | N |
| ATOM | 1814 | CA  | TRP | A | 237 | 14.367 | 3.148  | 3.967  | 1.00 | -0.03 | C |
| ATOM | 1815 | C   | TRP | A | 237 | 13.696 | 3.272  | 5.340  | 1.00 | 0.60  | C |
| ATOM | 1816 | O   | TRP | A | 237 | 13.762 | 2.339  | 6.147  | 1.00 | -0.57 | O |
| ATOM | 1817 | CB  | TRP | A | 237 | 15.508 | 4.163  | 3.825  | 1.00 | -0.01 | C |
| ATOM | 1818 | CG  | TRP | A | 237 | 16.587 | 4.037  | 4.860  | 1.00 | -0.14 | C |
| ATOM | 1819 | CD1 | TRP | A | 237 | 17.736 | 3.357  | 4.681  | 1.00 | -0.16 | C |
| ATOM | 1820 | CD2 | TRP | A | 237 | 16.641 | 4.546  | 6.236  | 1.00 | 0.12  | C |
| ATOM | 1821 | CE2 | TRP | A | 237 | 17.832 | 4.061  | 6.851  | 1.00 | 0.14  | C |
| ATOM | 1822 | CE3 | TRP | A | 237 | 15.810 | 5.352  | 7.043  | 1.00 | -0.24 | C |
| ATOM | 1823 | NE1 | TRP | A | 237 | 18.451 | 3.350  | 5.853  | 1.00 | -0.34 | N |
| ATOM | 1824 | CZ2 | TRP | A | 237 | 18.156 | 4.301  | 8.196  | 1.00 | -0.26 | C |
| ATOM | 1825 | CZ3 | TRP | A | 237 | 16.100 | 5.569  | 8.403  | 1.00 | -0.20 | C |
| ATOM | 1826 | CH2 | TRP | A | 237 | 17.268 | 5.046  | 8.986  | 1.00 | -0.11 | C |
| ATOM | 1827 | N   | HIS | A | 238 | 12.992 | 4.384  | 5.586  | 1.00 | -0.42 | N |
| ATOM | 1828 | CA  | HIS | A | 238 | 12.384 | 4.644  | 6.892  | 1.00 | -0.06 | C |
| ATOM | 1829 | C   | HIS | A | 238 | 11.299 | 3.613  | 7.265  | 1.00 | 0.60  | C |
| ATOM | 1830 | O   | HIS | A | 238 | 11.160 | 3.248  | 8.431  | 1.00 | -0.57 | O |
| ATOM | 1831 | CB  | HIS | A | 238 | 11.863 | 6.085  | 6.928  | 1.00 | -0.01 | C |
| ATOM | 1832 | CG  | HIS | A | 238 | 11.781 | 6.616  | 8.336  | 1.00 | 0.19  | C |
| ATOM | 1833 | CD2 | HIS | A | 238 | 10.647 | 6.704  | 9.099  | 1.00 | -0.22 | C |
| ATOM | 1834 | ND1 | HIS | A | 238 | 12.879 | 7.069  | 9.079  | 1.00 | -0.54 | N |
| ATOM | 1835 | CE1 | HIS | A | 238 | 12.378 | 7.417  | 10.272 | 1.00 | 0.16  | C |
| ATOM | 1836 | NE2 | HIS | A | 238 | 11.043 | 7.211  | 10.316 | 1.00 | -0.28 | N |
| ATOM | 1837 | N   | ARG | A | 239 | 10.579 | 3.088  | 6.262  | 1.00 | -0.35 | N |
| ATOM | 1838 | CA  | ARG | A | 239 | 9.595  | 2.010  | 6.397  | 1.00 | -0.26 | C |
| ATOM | 1839 | C   | ARG | A | 239 | 10.196 | 0.675  | 6.892  | 1.00 | 0.73  | C |
| ATOM | 1840 | O   | ARG | A | 239 | 9.436  | -0.145 | 7.404  | 1.00 | -0.59 | O |
| ATOM | 1841 | CB  | ARG | A | 239 | 8.857  | 1.827  | 5.049  | 1.00 | -0.00 | C |
| ATOM | 1842 | CG  | ARG | A | 239 | 7.605  | 0.929  | 5.133  | 1.00 | 0.04  | C |
| ATOM | 1843 | CD  | ARG | A | 239 | 6.967  | 0.629  | 3.769  | 1.00 | 0.05  | C |
| ATOM | 1844 | NE  | ARG | A | 239 | 6.268  | 1.786  | 3.183  | 1.00 | -0.53 | N |
| ATOM | 1845 | CZ  | ARG | A | 239 | 4.973  | 2.080  | 3.298  | 1.00 | 0.81  | C |
| ATOM | 1846 | NH1 | ARG | A | 239 | 4.479  | 3.059  | 2.568  | 1.00 | -0.86 | N |

|      |      |     |     |   |     |        |        |        |      |       |   |
|------|------|-----|-----|---|-----|--------|--------|--------|------|-------|---|
| ATOM | 1847 | NH2 | ARG | A | 239 | 4.158  | 1.427  | 4.106  | 1.00 | -0.86 | N |
| ATOM | 1848 | N   | LEU | A | 240 | 11.517 | 0.445  | 6.779  | 1.00 | -0.42 | N |
| ATOM | 1849 | CA  | LEU | A | 240 | 12.129 | -0.855 | 7.101  | 1.00 | -0.05 | C |
| ATOM | 1850 | C   | LEU | A | 240 | 13.361 | -0.778 | 8.013  | 1.00 | 0.60  | C |
| ATOM | 1851 | O   | LEU | A | 240 | 13.472 | -1.565 | 8.956  | 1.00 | -0.57 | O |
| ATOM | 1852 | CB  | LEU | A | 240 | 12.493 | -1.552 | 5.779  | 1.00 | -0.11 | C |
| ATOM | 1853 | CG  | LEU | A | 240 | 13.226 | -2.899 | 5.961  | 1.00 | 0.35  | C |
| ATOM | 1854 | CD1 | LEU | A | 240 | 12.362 | -3.963 | 6.642  | 1.00 | -0.41 | C |
| ATOM | 1855 | CD2 | LEU | A | 240 | 13.665 | -3.398 | 4.593  | 1.00 | -0.41 | C |
| ATOM | 1856 | N   | VAL | A | 241 | 14.297 | 0.140  | 7.763  | 1.00 | -0.42 | N |
| ATOM | 1857 | CA  | VAL | A | 241 | 15.555 | 0.151  | 8.527  | 1.00 | -0.09 | C |
| ATOM | 1858 | C   | VAL | A | 241 | 15.316 | 0.635  | 9.966  | 1.00 | 0.60  | C |
| ATOM | 1859 | O   | VAL | A | 241 | 15.969 | 0.149  | 10.887 | 1.00 | -0.57 | O |
| ATOM | 1860 | CB  | VAL | A | 241 | 16.668 | 0.931  | 7.800  | 1.00 | 0.30  | C |
| ATOM | 1861 | CG1 | VAL | A | 241 | 18.034 | 0.754  | 8.486  | 1.00 | -0.32 | C |
| ATOM | 1862 | CG2 | VAL | A | 241 | 16.809 | 0.435  | 6.347  | 1.00 | -0.32 | C |
| ATOM | 1863 | N   | LEU | A | 242 | 14.327 | 1.513  | 10.199 | 1.00 | -0.42 | N |
| ATOM | 1864 | CA  | LEU | A | 242 | 13.883 | 1.861  | 11.552 | 1.00 | -0.05 | C |
| ATOM | 1865 | C   | LEU | A | 242 | 13.275 | 0.646  | 12.305 | 1.00 | 0.60  | C |
| ATOM | 1866 | O   | LEU | A | 242 | 13.787 | 0.331  | 13.383 | 1.00 | -0.57 | O |
| ATOM | 1867 | CB  | LEU | A | 242 | 12.979 | 3.107  | 11.495 | 1.00 | -0.11 | C |
| ATOM | 1868 | CG  | LEU | A | 242 | 12.313 | 3.470  | 12.836 | 1.00 | 0.35  | C |
| ATOM | 1869 | CD1 | LEU | A | 242 | 13.332 | 3.779  | 13.936 | 1.00 | -0.41 | C |
| ATOM | 1870 | CD2 | LEU | A | 242 | 11.437 | 4.708  | 12.659 | 1.00 | -0.41 | C |
| ATOM | 1871 | N   | PRO | A | 243 | 12.263 | -0.084 | 11.780 | 1.00 | -0.25 | N |
| ATOM | 1872 | CA  | PRO | A | 243 | 11.857 | -1.390 | 12.312 | 1.00 | -0.03 | C |
| ATOM | 1873 | C   | PRO | A | 243 | 13.018 | -2.345 | 12.593 | 1.00 | 0.59  | C |
| ATOM | 1874 | O   | PRO | A | 243 | 13.096 | -2.872 | 13.698 | 1.00 | -0.57 | O |
| ATOM | 1875 | CB  | PRO | A | 243 | 10.882 | -1.980 | 11.293 | 1.00 | -0.01 | C |
| ATOM | 1876 | CG  | PRO | A | 243 | 10.232 | -0.737 | 10.700 | 1.00 | 0.02  | C |
| ATOM | 1877 | CD  | PRO | A | 243 | 11.340 | 0.318  | 10.725 | 1.00 | 0.02  | C |
| ATOM | 1878 | N   | ILE | A | 244 | 13.949 | -2.530 | 11.646 | 1.00 | -0.42 | N |
| ATOM | 1879 | CA  | ILE | A | 244 | 15.154 | -3.343 | 11.882 | 1.00 | -0.06 | C |
| ATOM | 1880 | C   | ILE | A | 244 | 16.011 | -2.786 | 13.037 | 1.00 | 0.60  | C |
| ATOM | 1881 | O   | ILE | A | 244 | 16.406 | -3.552 | 13.920 | 1.00 | -0.57 | O |
| ATOM | 1882 | CB  | ILE | A | 244 | 15.965 | -3.511 | 10.576 | 1.00 | 0.13  | C |
| ATOM | 1883 | CG1 | ILE | A | 244 | 15.223 | -4.363 | 9.514  | 1.00 | -0.04 | C |
| ATOM | 1884 | CG2 | ILE | A | 244 | 17.359 | -4.102 | 10.850 | 1.00 | -0.32 | C |
| ATOM | 1885 | CD1 | ILE | A | 244 | 15.002 | -5.843 | 9.864  | 1.00 | -0.07 | C |
| ATOM | 1886 | N   | ALA | A | 245 | 16.269 | -1.474 | 13.095 | 1.00 | -0.42 | N |
| ATOM | 1887 | CA  | ALA | A | 245 | 17.003 | -0.854 | 14.203 | 1.00 | 0.03  | C |
| ATOM | 1888 | C   | ALA | A | 245 | 16.309 | -1.031 | 15.570 | 1.00 | 0.60  | C |
| ATOM | 1889 | O   | ALA | A | 245 | 16.985 | -1.079 | 16.596 | 1.00 | -0.57 | O |
| ATOM | 1890 | CB  | ALA | A | 245 | 17.234 | 0.628  | 13.896 | 1.00 | -0.18 | C |
| ATOM | 1891 | N   | TYR | A | 246 | 14.975 | -1.158 | 15.596 | 1.00 | -0.42 | N |
| ATOM | 1892 | CA  | TYR | A | 246 | 14.224 | -1.555 | 16.792 | 1.00 | -0.00 | C |
| ATOM | 1893 | C   | TYR | A | 246 | 14.319 | -3.066 | 17.074 | 1.00 | 0.60  | C |
| ATOM | 1894 | O   | TYR | A | 246 | 14.754 | -3.438 | 18.162 | 1.00 | -0.57 | O |
| ATOM | 1895 | CB  | TYR | A | 246 | 12.757 | -1.119 | 16.663 | 1.00 | -0.02 | C |
| ATOM | 1896 | CG  | TYR | A | 246 | 11.878 | -1.644 | 17.786 | 1.00 | -0.00 | C |
| ATOM | 1897 | CD1 | TYR | A | 246 | 11.897 | -1.026 | 19.051 | 1.00 | -0.19 | C |
| ATOM | 1898 | CD2 | TYR | A | 246 | 11.080 | -2.788 | 17.582 | 1.00 | -0.19 | C |
| ATOM | 1899 | CE1 | TYR | A | 246 | 11.114 | -1.544 | 20.100 | 1.00 | -0.23 | C |
| ATOM | 1900 | CE2 | TYR | A | 246 | 10.304 | -3.307 | 18.632 | 1.00 | -0.23 | C |
| ATOM | 1901 | CZ  | TYR | A | 246 | 10.316 | -2.682 | 19.890 | 1.00 | 0.32  | C |
| ATOM | 1902 | OH  | TYR | A | 246 | 9.558  | -3.179 | 20.907 | 1.00 | -0.56 | O |
| ATOM | 1903 | N   | GLU | A | 247 | 13.946 | -3.924 | 16.108 | 1.00 | -0.52 | N |
| ATOM | 1904 | CA  | GLU | A | 247 | 13.863 | -5.392 | 16.272 | 1.00 | 0.04  | C |
| ATOM | 1905 | C   | GLU | A | 247 | 15.211 | -6.029 | 16.596 | 1.00 | 0.54  | C |
| ATOM | 1906 | O   | GLU | A | 247 | 15.298 | -6.879 | 17.478 | 1.00 | -0.58 | O |
| ATOM | 1907 | CB  | GLU | A | 247 | 13.328 | -6.077 | 15.000 | 1.00 | 0.06  | C |
| ATOM | 1908 | CG  | GLU | A | 247 | 11.839 | -5.867 | 14.713 | 1.00 | 0.01  | C |
| ATOM | 1909 | CD  | GLU | A | 247 | 10.956 | -6.638 | 15.686 | 1.00 | 0.81  | C |
| ATOM | 1910 | OE1 | GLU | A | 247 | 10.654 | -7.818 | 15.401 | 1.00 | -0.82 | O |
| ATOM | 1911 | OE2 | GLU | A | 247 | 10.574 | -6.023 | 16.704 | 1.00 | -0.82 | O |
| ATOM | 1912 | N   | PHE | A | 248 | 16.266 | -5.600 | 15.898 | 1.00 | -0.42 | N |
| ATOM | 1913 | CA  | PHE | A | 248 | 17.616 | -6.153 | 16.045 | 1.00 | -0.00 | C |
| ATOM | 1914 | C   | PHE | A | 248 | 18.524 | -5.295 | 16.945 | 1.00 | 0.60  | C |
| ATOM | 1915 | O   | PHE | A | 248 | 19.588 | -5.762 | 17.356 | 1.00 | -0.57 | O |
| ATOM | 1916 | CB  | PHE | A | 248 | 18.208 | -6.344 | 14.647 | 1.00 | -0.03 | C |
| ATOM | 1917 | CG  | PHE | A | 248 | 19.613 | -6.911 | 14.616 | 1.00 | 0.01  | C |
| ATOM | 1918 | CD1 | PHE | A | 248 | 19.861 | -8.245 | 14.996 | 1.00 | -0.13 | C |
| ATOM | 1919 | CD2 | PHE | A | 248 | 20.678 | -6.090 | 14.204 | 1.00 | -0.13 | C |
| ATOM | 1920 | CE1 | PHE | A | 248 | 21.173 | -8.757 | 14.950 | 1.00 | -0.17 | C |
| ATOM | 1921 | CE2 | PHE | A | 248 | 21.982 | -6.603 | 14.164 | 1.00 | -0.17 | C |
| ATOM | 1922 | CZ  | PHE | A | 248 | 22.232 | -7.939 | 14.521 | 1.00 | -0.11 | C |
| ATOM | 1923 | N   | ASN | A | 249 | 18.093 | -4.065 | 17.270 | 1.00 | -0.42 | N |

|      |      |     |     |   |     |        |        |        |      |       |   |
|------|------|-----|-----|---|-----|--------|--------|--------|------|-------|---|
| ATOM | 1924 | CA  | ASN | A | 249 | 18.656 | -3.202 | 18.310 | 1.00 | 0.01  | C |
| ATOM | 1925 | C   | ASN | A | 249 | 20.193 | -3.294 | 18.456 | 1.00 | 0.60  | C |
| ATOM | 1926 | O   | ASN | A | 249 | 20.655 | -3.774 | 19.488 | 1.00 | -0.57 | O |
| ATOM | 1927 | CB  | ASN | A | 249 | 17.883 | -3.523 | 19.603 | 1.00 | -0.20 | C |
| ATOM | 1928 | CG  | ASN | A | 249 | 17.876 | -2.362 | 20.570 | 1.00 | 0.71  | C |
| ATOM | 1929 | ND2 | ASN | A | 249 | 17.191 | -1.287 | 20.214 | 1.00 | -0.92 | N |
| ATOM | 1930 | OD1 | ASN | A | 249 | 18.466 | -2.411 | 21.639 | 1.00 | -0.59 | O |
| ATOM | 1931 | N   | PRO | A | 250 | 20.991 | -2.967 | 17.419 | 1.00 | -0.25 | N |
| ATOM | 1932 | CA  | PRO | A | 250 | 22.383 | -3.421 | 17.264 | 1.00 | -0.03 | C |
| ATOM | 1933 | C   | PRO | A | 250 | 23.391 | -2.717 | 18.178 | 1.00 | 0.59  | C |
| ATOM | 1934 | O   | PRO | A | 250 | 23.120 | -1.623 | 18.671 | 1.00 | -0.57 | O |
| ATOM | 1935 | CB  | PRO | A | 250 | 22.719 | -3.118 | 15.802 | 1.00 | -0.01 | C |
| ATOM | 1936 | CG  | PRO | A | 250 | 21.873 | -1.881 | 15.508 | 1.00 | 0.02  | C |
| ATOM | 1937 | CD  | PRO | A | 250 | 20.580 | -2.195 | 16.257 | 1.00 | 0.02  | C |
| ATOM | 1938 | N   | GLU | A | 251 | 24.593 | -3.305 | 18.302 | 1.00 | -0.52 | N |
| ATOM | 1939 | CA  | GLU | A | 251 | 25.728 | -2.657 | 18.989 | 1.00 | 0.04  | C |
| ATOM | 1940 | C   | GLU | A | 251 | 26.483 | -1.673 | 18.073 | 1.00 | 0.54  | C |
| ATOM | 1941 | O   | GLU | A | 251 | 26.908 | -0.616 | 18.537 | 1.00 | -0.58 | O |
| ATOM | 1942 | CB  | GLU | A | 251 | 26.736 | -3.670 | 19.576 | 1.00 | 0.06  | C |
| ATOM | 1943 | CG  | GLU | A | 251 | 26.216 | -4.978 | 20.200 | 1.00 | 0.01  | C |
| ATOM | 1944 | CD  | GLU | A | 251 | 25.349 | -4.856 | 21.449 | 1.00 | 0.81  | C |
| ATOM | 1945 | OE1 | GLU | A | 251 | 24.620 | -3.858 | 21.609 | 1.00 | -0.82 | O |
| ATOM | 1946 | OE2 | GLU | A | 251 | 25.340 | -5.828 | 22.236 | 1.00 | -0.82 | O |
| ATOM | 1947 | N   | LEU | A | 252 | 26.632 | -1.986 | 16.770 | 1.00 | -0.42 | N |
| ATOM | 1948 | CA  | LEU | A | 252 | 27.427 | -1.195 | 15.804 | 1.00 | -0.05 | C |
| ATOM | 1949 | C   | LEU | A | 252 | 26.867 | -1.230 | 14.363 | 1.00 | 0.60  | C |
| ATOM | 1950 | O   | LEU | A | 252 | 26.112 | -2.142 | 13.996 | 1.00 | -0.57 | O |
| ATOM | 1951 | CB  | LEU | A | 252 | 28.890 | -1.703 | 15.798 | 1.00 | -0.11 | C |
| ATOM | 1952 | CG  | LEU | A | 252 | 29.752 | -1.328 | 17.024 | 1.00 | 0.35  | C |
| ATOM | 1953 | CD1 | LEU | A | 252 | 31.131 | -1.980 | 16.913 | 1.00 | -0.41 | C |
| ATOM | 1954 | CD2 | LEU | A | 252 | 29.980 | 0.185  | 17.138 | 1.00 | -0.41 | C |
| ATOM | 1955 | N   | VAL | A | 253 | 27.273 | -0.238 | 13.545 | 1.00 | -0.42 | N |
| ATOM | 1956 | CA  | VAL | A | 253 | 26.758 | -0.026 | 12.176 | 1.00 | -0.09 | C |
| ATOM | 1957 | C   | VAL | A | 253 | 27.869 | 0.100  | 11.117 | 1.00 | 0.60  | C |
| ATOM | 1958 | O   | VAL | A | 253 | 28.749 | 0.965  | 11.213 | 1.00 | -0.57 | O |
| ATOM | 1959 | CB  | VAL | A | 253 | 25.859 | 1.230  | 12.155 | 1.00 | 0.30  | C |
| ATOM | 1960 | CG1 | VAL | A | 253 | 25.458 | 1.701  | 10.750 | 1.00 | -0.32 | C |
| ATOM | 1961 | CG2 | VAL | A | 253 | 24.547 | 0.992  | 12.915 | 1.00 | -0.32 | C |
| ATOM | 1962 | N   | LEU | A | 254 | 27.734 | -0.707 | 10.057 | 1.00 | -0.42 | N |
| ATOM | 1963 | CA  | LEU | A | 254 | 28.545 | -0.639 | 8.839  | 1.00 | -0.05 | C |
| ATOM | 1964 | C   | LEU | A | 254 | 27.627 | -0.205 | 7.682  | 1.00 | 0.60  | C |
| ATOM | 1965 | O   | LEU | A | 254 | 26.568 | -0.807 | 7.492  | 1.00 | -0.57 | O |
| ATOM | 1966 | CB  | LEU | A | 254 | 29.175 | -2.030 | 8.623  | 1.00 | -0.11 | C |
| ATOM | 1967 | CG  | LEU | A | 254 | 30.383 | -2.105 | 7.667  | 1.00 | 0.35  | C |
| ATOM | 1968 | CD1 | LEU | A | 254 | 30.796 | -3.573 | 7.527  | 1.00 | -0.41 | C |
| ATOM | 1969 | CD2 | LEU | A | 254 | 30.116 | -1.560 | 6.263  | 1.00 | -0.41 | C |
| ATOM | 1970 | N   | VAL | A | 255 | 27.991 | 0.838  | 6.929  | 1.00 | -0.42 | N |
| ATOM | 1971 | CA  | VAL | A | 255 | 27.122 | 1.378  | 5.866  | 1.00 | -0.09 | C |
| ATOM | 1972 | C   | VAL | A | 255 | 27.860 | 1.572  | 4.532  | 1.00 | 0.60  | C |
| ATOM | 1973 | O   | VAL | A | 255 | 29.093 | 1.685  | 4.506  | 1.00 | -0.57 | O |
| ATOM | 1974 | CB  | VAL | A | 255 | 26.407 | 2.642  | 6.385  | 1.00 | 0.30  | C |
| ATOM | 1975 | CG1 | VAL | A | 255 | 27.387 | 3.777  | 6.697  | 1.00 | -0.32 | C |
| ATOM | 1976 | CG2 | VAL | A | 255 | 25.306 | 3.148  | 5.449  | 1.00 | -0.32 | C |
| ATOM | 1977 | N   | SER | A | 256 | 27.072 | 1.591  | 3.444  | 1.00 | -0.42 | N |
| ATOM | 1978 | CA  | SER | A | 256 | 27.496 | 1.494  | 2.039  | 1.00 | -0.02 | C |
| ATOM | 1979 | C   | SER | A | 256 | 26.898 | 2.623  | 1.134  | 1.00 | 0.60  | C |
| ATOM | 1980 | O   | SER | A | 256 | 26.123 | 3.449  | 1.636  | 1.00 | -0.57 | O |
| ATOM | 1981 | CB  | SER | A | 256 | 27.148 | 0.049  | 1.624  | 1.00 | 0.21  | C |
| ATOM | 1982 | OG  | SER | A | 256 | 26.343 | -0.047 | 0.474  | 1.00 | -0.65 | O |
| ATOM | 1983 | N   | ALA | A | 257 | 27.281 | 2.715  | -0.156 | 1.00 | -0.42 | N |
| ATOM | 1984 | CA  | ALA | A | 257 | 26.790 | 3.689  | -1.158 | 1.00 | 0.03  | C |
| ATOM | 1985 | C   | ALA | A | 257 | 27.269 | 3.429  | -2.609 | 1.00 | 0.60  | C |
| ATOM | 1986 | O   | ALA | A | 257 | 28.427 | 3.687  | -2.955 | 1.00 | -0.57 | O |
| ATOM | 1987 | CB  | ALA | A | 257 | 27.222 | 5.118  | -0.808 | 1.00 | -0.18 | C |
| ATOM | 1988 | N   | GLY | A | 258 | 26.345 | 3.032  | -3.489 | 1.00 | -0.42 | N |
| ATOM | 1989 | CA  | GLY | A | 258 | 26.566 | 2.918  | -4.937 | 1.00 | -0.03 | C |
| ATOM | 1990 | C   | GLY | A | 258 | 25.928 | 4.092  | -5.668 | 1.00 | 0.60  | C |
| ATOM | 1991 | O   | GLY | A | 258 | 24.712 | 4.159  | -5.835 | 1.00 | -0.57 | O |
| ATOM | 1992 | N   | PHE | A | 259 | 26.775 | 5.015  | -6.113 | 1.00 | -0.42 | N |
| ATOM | 1993 | CA  | PHE | A | 259 | 26.425 | 6.292  | -6.721 | 1.00 | -0.00 | C |
| ATOM | 1994 | C   | PHE | A | 259 | 25.846 | 6.147  | -8.131 | 1.00 | 0.60  | C |
| ATOM | 1995 | O   | PHE | A | 259 | 25.290 | 7.105  | -8.647 | 1.00 | -0.57 | O |
| ATOM | 1996 | CB  | PHE | A | 259 | 27.642 | 7.239  | -6.667 | 1.00 | -0.03 | C |
| ATOM | 1997 | CG  | PHE | A | 259 | 28.047 | 7.568  | -5.236 | 1.00 | 0.01  | C |
| ATOM | 1998 | CD1 | PHE | A | 259 | 27.585 | 8.750  | -4.611 | 1.00 | -0.13 | C |
| ATOM | 1999 | CD2 | PHE | A | 259 | 28.777 | 6.622  | -4.481 | 1.00 | -0.13 | C |
| ATOM | 2000 | CE1 | PHE | A | 259 | 27.834 | 8.968  | -3.235 | 1.00 | -0.17 | C |

|      |      |     |     |   |     |        |        |         |      |       |   |
|------|------|-----|-----|---|-----|--------|--------|---------|------|-------|---|
| ATOM | 2001 | CE2 | PHE | A | 259 | 28.995 | 6.832  | -3.109  | 1.00 | -0.17 | C |
| ATOM | 2002 | CZ  | PHE | A | 259 | 28.521 | 8.000  | -2.481  | 1.00 | -0.11 | C |
| ATOM | 2003 | N   | ASP | A | 260 | 25.852 | 4.953  | -8.724  | 1.00 | -0.52 | N |
| ATOM | 2004 | CA  | ASP | A | 260 | 24.978 | 4.567  | -9.839  | 1.00 | 0.04  | C |
| ATOM | 2005 | C   | ASP | A | 260 | 23.481 | 4.467  | -9.441  | 1.00 | 0.54  | C |
| ATOM | 2006 | O   | ASP | A | 260 | 22.606 | 4.429  | -10.310 | 1.00 | -0.58 | O |
| ATOM | 2007 | CB  | ASP | A | 260 | 25.576 | 3.216  | -10.374 | 1.00 | -0.03 | C |
| ATOM | 2008 | CG  | ASP | A | 260 | 26.285 | 2.215  | -9.378  | 1.00 | 0.80  | C |
| ATOM | 2009 | OD1 | ASP | A | 260 | 26.484 | 2.573  | -8.195  | 1.00 | -0.80 | O |
| ATOM | 2010 | OD2 | ASP | A | 260 | 26.734 | 1.122  | -9.815  | 1.00 | -0.80 | O |
| ATOM | 2011 | N   | ALA | A | 261 | 23.156 | 4.517  | -8.137  | 1.00 | -0.42 | N |
| ATOM | 2012 | CA  | ALA | A | 261 | 21.812 | 4.845  | -7.627  | 1.00 | 0.03  | C |
| ATOM | 2013 | C   | ALA | A | 261 | 21.477 | 6.349  | -7.769  | 1.00 | 0.60  | C |
| ATOM | 2014 | O   | ALA | A | 261 | 20.341 | 6.779  | -7.516  | 1.00 | -0.57 | O |
| ATOM | 2015 | CB  | ALA | A | 261 | 21.680 | 4.445  | -6.149  | 1.00 | -0.18 | C |
| ATOM | 2016 | N   | ALA | A | 262 | 22.478 | 7.152  | -8.167  | 1.00 | -0.42 | N |
| ATOM | 2017 | CA  | ALA | A | 262 | 22.444 | 8.597  | -8.082  | 1.00 | 0.03  | C |
| ATOM | 2018 | C   | ALA | A | 262 | 22.813 | 9.345  | -9.377  | 1.00 | 0.60  | C |
| ATOM | 2019 | O   | ALA | A | 262 | 23.564 | 8.903  | -10.252 | 1.00 | -0.57 | O |
| ATOM | 2020 | CB  | ALA | A | 262 | 23.301 | 9.053  | -6.892  | 1.00 | -0.18 | C |
| ATOM | 2021 | N   | ARG | A | 263 | 22.201 | 10.531 | -9.461  | 1.00 | -0.35 | N |
| ATOM | 2022 | CA  | ARG | A | 263 | 22.128 | 11.350 | -10.666 | 1.00 | -0.26 | C |
| ATOM | 2023 | C   | ARG | A | 263 | 23.505 | 11.706 | -11.269 | 1.00 | 0.73  | C |
| ATOM | 2024 | O   | ARG | A | 263 | 24.453 | 12.117 | -10.590 | 1.00 | -0.59 | O |
| ATOM | 2025 | CB  | ARG | A | 263 | 21.261 | 12.599 | -10.405 | 1.00 | -0.00 | C |
| ATOM | 2026 | CG  | ARG | A | 263 | 19.777 | 12.239 | -10.170 | 1.00 | 0.04  | C |
| ATOM | 2027 | CD  | ARG | A | 263 | 18.857 | 13.471 | -10.173 | 1.00 | 0.05  | C |
| ATOM | 2028 | NE  | ARG | A | 263 | 17.462 | 13.139 | -9.819  | 1.00 | -0.53 | N |
| ATOM | 2029 | CZ  | ARG | A | 263 | 16.948 | 13.057 | -8.593  | 1.00 | 0.81  | C |
| ATOM | 2030 | NH1 | ARG | A | 263 | 15.663 | 12.865 | -8.403  | 1.00 | -0.86 | N |
| ATOM | 2031 | NH2 | ARG | A | 263 | 17.667 | 13.153 | -7.500  | 1.00 | -0.86 | N |
| ATOM | 2032 | N   | GLY | A | 264 | 23.575 | 11.546 | -12.602 | 1.00 | -0.42 | N |
| ATOM | 2033 | CA  | GLY | A | 264 | 24.701 | 11.927 | -13.468 | 1.00 | -0.03 | C |
| ATOM | 2034 | C   | GLY | A | 264 | 25.416 | 10.743 | -14.142 | 1.00 | 0.60  | C |
| ATOM | 2035 | O   | GLY | A | 264 | 26.178 | 10.945 | -15.091 | 1.00 | -0.57 | O |
| ATOM | 2036 | N   | ASP | A | 265 | 25.224 | 9.524  | -13.628 | 1.00 | -0.52 | N |
| ATOM | 2037 | CA  | ASP | A | 265 | 26.058 | 8.354  | -13.925 | 1.00 | 0.04  | C |
| ATOM | 2038 | C   | ASP | A | 265 | 25.634 | 7.542  | -15.177 | 1.00 | 0.54  | C |
| ATOM | 2039 | O   | ASP | A | 265 | 24.433 | 7.367  | -15.403 | 1.00 | -0.58 | O |
| ATOM | 2040 | CB  | ASP | A | 265 | 26.071 | 7.477  | -12.662 | 1.00 | -0.03 | C |
| ATOM | 2041 | CG  | ASP | A | 265 | 27.100 | 6.359  | -12.782 | 1.00 | 0.80  | C |
| ATOM | 2042 | OD1 | ASP | A | 265 | 28.251 | 6.564  | -12.317 | 1.00 | -0.80 | O |
| ATOM | 2043 | OD2 | ASP | A | 265 | 26.732 | 5.337  | -13.405 | 1.00 | -0.80 | O |
| ATOM | 2044 | N   | PRO | A | 266 | 26.582 | 6.991  | -15.974 | 1.00 | -0.25 | N |
| ATOM | 2045 | CA  | PRO | A | 266 | 26.286 | 6.160  | -17.152 | 1.00 | -0.03 | C |
| ATOM | 2046 | C   | PRO | A | 266 | 25.513 | 4.852  | -16.890 | 1.00 | 0.59  | C |
| ATOM | 2047 | O   | PRO | A | 266 | 24.949 | 4.310  | -17.841 | 1.00 | -0.57 | O |
| ATOM | 2048 | CB  | PRO | A | 266 | 27.639 | 5.891  | -17.827 | 1.00 | -0.01 | C |
| ATOM | 2049 | CG  | PRO | A | 266 | 28.657 | 6.071  | -16.704 | 1.00 | 0.02  | C |
| ATOM | 2050 | CD  | PRO | A | 266 | 28.026 | 7.178  | -15.866 | 1.00 | 0.02  | C |
| ATOM | 2051 | N   | LEU | A | 267 | 25.434 | 4.355  | -15.645 | 1.00 | -0.42 | N |
| ATOM | 2052 | CA  | LEU | A | 267 | 24.583 | 3.200  | -15.318 | 1.00 | -0.05 | C |
| ATOM | 2053 | C   | LEU | A | 267 | 23.101 | 3.589  | -15.083 | 1.00 | 0.60  | C |
| ATOM | 2054 | O   | LEU | A | 267 | 22.265 | 2.698  | -14.963 | 1.00 | -0.57 | O |
| ATOM | 2055 | CB  | LEU | A | 267 | 25.222 | 2.417  | -14.141 | 1.00 | -0.11 | C |
| ATOM | 2056 | CG  | LEU | A | 267 | 24.918 | 0.898  | -14.117 | 1.00 | 0.35  | C |
| ATOM | 2057 | CD1 | LEU | A | 267 | 25.558 | 0.154  | -15.306 | 1.00 | -0.41 | C |
| ATOM | 2058 | CD2 | LEU | A | 267 | 25.437 | 0.248  | -12.825 | 1.00 | -0.41 | C |
| ATOM | 2059 | N   | GLY | A | 268 | 22.794 | 4.898  | -15.059 | 1.00 | -0.42 | N |
| ATOM | 2060 | CA  | GLY | A | 268 | 21.509 | 5.622  | -15.169 | 1.00 | -0.03 | C |
| ATOM | 2061 | C   | GLY | A | 268 | 20.175 | 5.061  | -14.635 | 1.00 | 0.60  | C |
| ATOM | 2062 | O   | GLY | A | 268 | 19.139 | 5.669  | -14.899 | 1.00 | -0.57 | O |
| ATOM | 2063 | N   | GLY | A | 269 | 20.135 | 3.937  | -13.915 | 1.00 | -0.42 | N |
| ATOM | 2064 | CA  | GLY | A | 269 | 18.887 | 3.279  | -13.511 | 1.00 | -0.03 | C |
| ATOM | 2065 | C   | GLY | A | 269 | 18.001 | 4.082  | -12.551 | 1.00 | 0.60  | C |
| ATOM | 2066 | O   | GLY | A | 269 | 16.773 | 3.978  | -12.637 | 1.00 | -0.57 | O |
| ATOM | 2067 | N   | CYS | A | 270 | 18.590 | 4.897  | -11.663 | 1.00 | -0.42 | N |
| ATOM | 2068 | CA  | CYS | A | 270 | 17.899 | 5.498  | -10.517 | 1.00 | 0.02  | C |
| ATOM | 2069 | C   | CYS | A | 270 | 18.070 | 7.027  | -10.449 | 1.00 | 0.60  | C |
| ATOM | 2070 | O   | CYS | A | 270 | 18.668 | 7.655  | -11.327 | 1.00 | -0.57 | O |
| ATOM | 2071 | CB  | CYS | A | 270 | 18.408 | 4.827  | -9.233  | 1.00 | -0.12 | C |
| ATOM | 2072 | SG  | CYS | A | 270 | 17.974 | 3.067  | -9.166  | 1.00 | -0.31 | S |
| ATOM | 2073 | N   | GLN | A | 271 | 17.485 | 7.635  | -9.413  | 1.00 | -0.42 | N |
| ATOM | 2074 | CA  | GLN | A | 271 | 17.331 | 9.078  | -9.214  | 1.00 | -0.00 | C |
| ATOM | 2075 | C   | GLN | A | 271 | 17.479 | 9.490  | -7.735  | 1.00 | 0.60  | C |
| ATOM | 2076 | O   | GLN | A | 271 | 16.616 | 10.181 | -7.193  | 1.00 | -0.57 | O |
| ATOM | 2077 | CB  | GLN | A | 271 | 15.974 | 9.514  | -9.804  | 1.00 | -0.00 | C |

|      |      |     |     |   |     |        |        |         |      |       |   |
|------|------|-----|-----|---|-----|--------|--------|---------|------|-------|---|
| ATOM | 2078 | CG  | GLN | A | 271 | 15.896 | 9.511  | -11.335 | 1.00 | -0.06 | C |
| ATOM | 2079 | CD  | GLN | A | 271 | 16.801 | 10.532 | -11.994 | 1.00 | 0.70  | C |
| ATOM | 2080 | NE2 | GLN | A | 271 | 17.926 | 10.096 | -12.531 | 1.00 | -0.94 | N |
| ATOM | 2081 | OE1 | GLN | A | 271 | 16.491 | 11.717 | -12.022 | 1.00 | -0.61 | O |
| ATOM | 2082 | N   | VAL | A | 272 | 18.556 | 9.078  | -7.054  | 1.00 | -0.42 | N |
| ATOM | 2083 | CA  | VAL | A | 272 | 18.965 | 9.732  | -5.794  | 1.00 | -0.09 | C |
| ATOM | 2084 | C   | VAL | A | 272 | 19.938 | 10.895 | -6.108  | 1.00 | 0.60  | C |
| ATOM | 2085 | O   | VAL | A | 272 | 20.703 | 10.860 | -7.074  | 1.00 | -0.57 | O |
| ATOM | 2086 | CB  | VAL | A | 272 | 19.541 | 8.700  | -4.790  | 1.00 | 0.30  | C |
| ATOM | 2087 | CG1 | VAL | A | 272 | 19.865 | 9.321  | -3.419  | 1.00 | -0.32 | C |
| ATOM | 2088 | CG2 | VAL | A | 272 | 18.525 | 7.566  | -4.527  | 1.00 | -0.32 | C |
| ATOM | 2089 | N   | SER | A | 273 | 19.912 | 11.950 | -5.295  | 1.00 | -0.42 | N |
| ATOM | 2090 | CA  | SER | A | 273 | 20.826 | 13.097 | -5.354  | 1.00 | -0.02 | C |
| ATOM | 2091 | C   | SER | A | 273 | 21.586 | 13.300 | -4.026  | 1.00 | 0.60  | C |
| ATOM | 2092 | O   | SER | A | 273 | 21.157 | 12.775 | -2.994  | 1.00 | -0.57 | O |
| ATOM | 2093 | CB  | SER | A | 273 | 20.034 | 14.368 | -5.724  | 1.00 | 0.21  | C |
| ATOM | 2094 | OG  | SER | A | 273 | 20.045 | 14.563 | -7.128  | 1.00 | -0.65 | O |
| ATOM | 2095 | N   | PRO | A | 274 | 22.696 | 14.077 | -4.028  | 1.00 | -0.25 | N |
| ATOM | 2096 | CA  | PRO | A | 274 | 23.585 | 14.301 | -2.880  | 1.00 | -0.03 | C |
| ATOM | 2097 | C   | PRO | A | 274 | 22.891 | 14.502 | -1.526  | 1.00 | 0.59  | C |
| ATOM | 2098 | O   | PRO | A | 274 | 23.294 | 13.908 | -0.519  | 1.00 | -0.57 | O |
| ATOM | 2099 | CB  | PRO | A | 274 | 24.428 | 15.516 | -3.285  | 1.00 | -0.01 | C |
| ATOM | 2100 | CG  | PRO | A | 274 | 24.579 | 15.352 | -4.793  | 1.00 | 0.02  | C |
| ATOM | 2101 | CD  | PRO | A | 274 | 23.234 | 14.766 | -5.201  | 1.00 | 0.02  | C |
| ATOM | 2102 | N   | GLU | A | 275 | 21.808 | 15.292 | -1.504  | 1.00 | -0.52 | N |
| ATOM | 2103 | CA  | GLU | A | 275 | 21.104 | 15.604 | -0.249  | 1.00 | 0.04  | C |
| ATOM | 2104 | C   | GLU | A | 275 | 20.146 | 14.498 | 0.225   | 1.00 | 0.54  | C |
| ATOM | 2105 | O   | GLU | A | 275 | 19.805 | 14.442 | 1.405   | 1.00 | -0.58 | O |
| ATOM | 2106 | CB  | GLU | A | 275 | 20.398 | 16.967 | -0.342  | 1.00 | 0.06  | C |
| ATOM | 2107 | CG  | GLU | A | 275 | 20.509 | 17.763 | 0.964   | 1.00 | 0.01  | C |
| ATOM | 2108 | CD  | GLU | A | 275 | 21.949 | 18.177 | 1.263   | 1.00 | 0.81  | C |
| ATOM | 2109 | OE1 | GLU | A | 275 | 22.538 | 17.619 | 2.215   | 1.00 | -0.82 | O |
| ATOM | 2110 | OE2 | GLU | A | 275 | 22.469 | 19.078 | 0.564   | 1.00 | -0.82 | O |
| ATOM | 2111 | N   | GLY | A | 276 | 19.766 | 13.562 | -0.655  | 1.00 | -0.42 | N |
| ATOM | 2112 | CA  | GLY | A | 276 | 18.908 | 12.422 | -0.302  | 1.00 | -0.03 | C |
| ATOM | 2113 | C   | GLY | A | 276 | 19.681 | 11.375 | 0.499   | 1.00 | 0.60  | C |
| ATOM | 2114 | O   | GLY | A | 276 | 19.247 | 10.938 | 1.569   | 1.00 | -0.57 | O |
| ATOM | 2115 | N   | TYR | A | 277 | 20.890 | 11.055 | 0.018   | 1.00 | -0.42 | N |
| ATOM | 2116 | CA  | TYR | A | 277 | 21.846 | 10.238 | 0.769   | 1.00 | -0.00 | C |
| ATOM | 2117 | C   | TYR | A | 277 | 22.292 | 10.943 | 2.065   | 1.00 | 0.60  | C |
| ATOM | 2118 | O   | TYR | A | 277 | 22.545 | 10.293 | 3.086   | 1.00 | -0.57 | O |
| ATOM | 2119 | CB  | TYR | A | 277 | 23.046 | 9.891  | -0.124  | 1.00 | -0.02 | C |
| ATOM | 2120 | CG  | TYR | A | 277 | 23.930 | 8.819  | 0.484   | 1.00 | -0.00 | C |
| ATOM | 2121 | CD1 | TYR | A | 277 | 23.855 | 7.487  | 0.036   | 1.00 | -0.19 | C |
| ATOM | 2122 | CD2 | TYR | A | 277 | 24.799 | 9.147  | 1.540   | 1.00 | -0.19 | C |
| ATOM | 2123 | CE1 | TYR | A | 277 | 24.616 | 6.489  | 0.671   | 1.00 | -0.23 | C |
| ATOM | 2124 | CE2 | TYR | A | 277 | 25.532 | 8.147  | 2.191   | 1.00 | -0.23 | C |
| ATOM | 2125 | CZ  | TYR | A | 277 | 25.421 | 6.817  | 1.779   | 1.00 | 0.32  | C |
| ATOM | 2126 | OH  | TYR | A | 277 | 26.100 | 5.872  | 2.484   | 1.00 | -0.56 | O |
| ATOM | 2127 | N   | ALA | A | 278 | 22.362 | 12.284 | 2.052   | 1.00 | -0.42 | N |
| ATOM | 2128 | CA  | ALA | A | 278 | 22.590 | 13.065 | 3.268   | 1.00 | 0.03  | C |
| ATOM | 2129 | C   | ALA | A | 278 | 21.462 | 12.877 | 4.300   | 1.00 | 0.60  | C |
| ATOM | 2130 | O   | ALA | A | 278 | 21.774 | 12.535 | 5.444   | 1.00 | -0.57 | O |
| ATOM | 2131 | CB  | ALA | A | 278 | 22.807 | 14.544 | 2.937   | 1.00 | -0.18 | C |
| ATOM | 2132 | N   | HIS | A | 279 | 20.180 | 13.024 | 3.922   | 1.00 | -0.42 | N |
| ATOM | 2133 | CA  | HIS | A | 279 | 19.048 | 12.659 | 4.793   | 1.00 | -0.06 | C |
| ATOM | 2134 | C   | HIS | A | 279 | 19.162 | 11.207 | 5.302   | 1.00 | 0.60  | C |
| ATOM | 2135 | O   | HIS | A | 279 | 18.970 | 10.941 | 6.490   | 1.00 | -0.57 | O |
| ATOM | 2136 | CB  | HIS | A | 279 | 17.701 | 12.829 | 4.067   | 1.00 | -0.01 | C |
| ATOM | 2137 | CG  | HIS | A | 279 | 17.316 | 14.241 | 3.701   | 1.00 | 0.19  | C |
| ATOM | 2138 | CD2 | HIS | A | 279 | 16.881 | 14.650 | 2.472   | 1.00 | -0.22 | C |
| ATOM | 2139 | ND1 | HIS | A | 279 | 17.279 | 15.328 | 4.575   | 1.00 | -0.54 | N |
| ATOM | 2140 | CE1 | HIS | A | 279 | 16.860 | 16.370 | 3.839   | 1.00 | 0.16  | C |
| ATOM | 2141 | NE2 | HIS | A | 279 | 16.608 | 15.994 | 2.573   | 1.00 | -0.28 | N |
| ATOM | 2142 | N   | LEU | A | 280 | 19.511 | 10.264 | 4.418   | 1.00 | -0.42 | N |
| ATOM | 2143 | CA  | LEU | A | 280 | 19.691 | 8.851  | 4.778   | 1.00 | -0.05 | C |
| ATOM | 2144 | C   | LEU | A | 280 | 20.796 | 8.645  | 5.835   | 1.00 | 0.60  | C |
| ATOM | 2145 | O   | LEU | A | 280 | 20.596 | 8.005  | 6.873   | 1.00 | -0.57 | O |
| ATOM | 2146 | CB  | LEU | A | 280 | 20.012 | 8.074  | 3.488   | 1.00 | -0.11 | C |
| ATOM | 2147 | CG  | LEU | A | 280 | 19.378 | 6.680  | 3.458   | 1.00 | 0.35  | C |
| ATOM | 2148 | CD1 | LEU | A | 280 | 17.857 | 6.785  | 3.327   | 1.00 | -0.41 | C |
| ATOM | 2149 | CD2 | LEU | A | 280 | 19.896 | 5.920  | 2.238   | 1.00 | -0.41 | C |
| ATOM | 2150 | N   | THR | A | 281 | 21.953 | 9.264  | 5.582   | 1.00 | -0.42 | N |
| ATOM | 2151 | CA  | THR | A | 281 | 23.099 | 9.316  | 6.491   | 1.00 | -0.04 | C |
| ATOM | 2152 | C   | THR | A | 281 | 22.671 | 9.872  | 7.846   | 1.00 | 0.60  | C |
| ATOM | 2153 | O   | THR | A | 281 | 22.932 | 9.238  | 8.868   | 1.00 | -0.57 | O |
| ATOM | 2154 | CB  | THR | A | 281 | 24.230 | 10.192 | 5.917   | 1.00 | 0.37  | C |

|      |      |     |     |   |     |        |        |        |      |       |   |
|------|------|-----|-----|---|-----|--------|--------|--------|------|-------|---|
| ATOM | 2155 | CG2 | THR | A | 281 | 25.498 | 10.144 | 6.768  | 1.00 | -0.24 | C |
| ATOM | 2156 | OG1 | THR | A | 281 | 24.595 | 9.757  | 4.635  | 1.00 | -0.68 | O |
| ATOM | 2157 | N   | HIS | A | 282 | 21.966 | 11.010 | 7.848  | 1.00 | -0.42 | N |
| ATOM | 2158 | CA  | HIS | A | 282 | 21.465 | 11.657 | 9.052  | 1.00 | -0.06 | C |
| ATOM | 2159 | C   | HIS | A | 282 | 20.500 | 10.745 | 9.823  | 1.00 | 0.60  | C |
| ATOM | 2160 | O   | HIS | A | 282 | 20.677 | 10.554 | 11.023 | 1.00 | -0.57 | O |
| ATOM | 2161 | CB  | HIS | A | 282 | 20.802 | 12.990 | 8.675  | 1.00 | -0.01 | C |
| ATOM | 2162 | CG  | HIS | A | 282 | 20.257 | 13.719 | 9.876  | 1.00 | 0.19  | C |
| ATOM | 2163 | CD2 | HIS | A | 282 | 18.995 | 13.599 | 10.385 | 1.00 | -0.22 | C |
| ATOM | 2164 | ND1 | HIS | A | 282 | 20.994 | 14.586 | 10.685 | 1.00 | -0.54 | N |
| ATOM | 2165 | CE1 | HIS | A | 282 | 20.163 | 14.962 | 11.663 | 1.00 | 0.16  | C |
| ATOM | 2166 | NE2 | HIS | A | 282 | 18.959 | 14.386 | 11.513 | 1.00 | -0.28 | N |
| ATOM | 2167 | N   | LEU | A | 283 | 19.513 | 10.131 | 9.159  | 1.00 | -0.42 | N |
| ATOM | 2168 | CA  | LEU | A | 283 | 18.572 | 9.226  | 9.822  | 1.00 | -0.05 | C |
| ATOM | 2169 | C   | LEU | A | 283 | 19.266 | 7.995  | 10.424 | 1.00 | 0.60  | C |
| ATOM | 2170 | O   | LEU | A | 283 | 18.994 | 7.663  | 11.579 | 1.00 | -0.57 | O |
| ATOM | 2171 | CB  | LEU | A | 283 | 17.469 | 8.791  | 8.852  | 1.00 | -0.11 | C |
| ATOM | 2172 | CG  | LEU | A | 283 | 16.466 | 9.892  | 8.469  | 1.00 | 0.35  | C |
| ATOM | 2173 | CD1 | LEU | A | 283 | 15.509 | 9.324  | 7.423  | 1.00 | -0.41 | C |
| ATOM | 2174 | CD2 | LEU | A | 283 | 15.640 | 10.394 | 9.660  | 1.00 | -0.41 | C |
| ATOM | 2175 | N   | LEU | A | 284 | 20.194 | 7.354  | 9.699  | 1.00 | -0.42 | N |
| ATOM | 2176 | CA  | LEU | A | 284 | 21.005 | 6.286  | 10.289 | 1.00 | -0.05 | C |
| ATOM | 2177 | C   | LEU | A | 284 | 21.896 | 6.810  | 11.434 | 1.00 | 0.60  | C |
| ATOM | 2178 | O   | LEU | A | 284 | 22.061 | 6.125  | 12.440 | 1.00 | -0.57 | O |
| ATOM | 2179 | CB  | LEU | A | 284 | 21.815 | 5.584  | 9.188  | 1.00 | -0.11 | C |
| ATOM | 2180 | CG  | LEU | A | 284 | 22.651 | 4.385  | 9.685  | 1.00 | 0.35  | C |
| ATOM | 2181 | CD1 | LEU | A | 284 | 21.823 | 3.300  | 10.390 | 1.00 | -0.41 | C |
| ATOM | 2182 | CD2 | LEU | A | 284 | 23.380 | 3.780  | 8.490  | 1.00 | -0.41 | C |
| ATOM | 2183 | N   | MET | A | 285 | 22.451 | 8.026  | 11.317 | 1.00 | -0.42 | N |
| ATOM | 2184 | CA  | MET | A | 285 | 23.194 | 8.696  | 12.398 | 1.00 | -0.02 | C |
| ATOM | 2185 | C   | MET | A | 285 | 22.321 | 9.005  | 13.620 | 1.00 | 0.60  | C |
| ATOM | 2186 | O   | MET | A | 285 | 22.815 | 8.963  | 14.743 | 1.00 | -0.57 | O |
| ATOM | 2187 | CB  | MET | A | 285 | 23.884 | 9.969  | 11.881 | 1.00 | 0.03  | C |
| ATOM | 2188 | CG  | MET | A | 285 | 24.924 | 10.490 | 12.877 | 1.00 | 0.00  | C |
| ATOM | 2189 | SD  | MET | A | 285 | 26.167 | 11.594 | 12.157 | 1.00 | -0.27 | S |
| ATOM | 2190 | CE  | MET | A | 285 | 25.122 | 13.019 | 11.751 | 1.00 | -0.05 | C |
| ATOM | 2191 | N   | GLY | A | 286 | 21.021 | 9.223  | 13.399 | 1.00 | -0.42 | N |
| ATOM | 2192 | CA  | GLY | A | 286 | 19.953 | 9.276  | 14.394 | 1.00 | -0.03 | C |
| ATOM | 2193 | C   | GLY | A | 286 | 19.814 | 8.017  | 15.256 | 1.00 | 0.60  | C |
| ATOM | 2194 | O   | GLY | A | 286 | 19.175 | 8.090  | 16.295 | 1.00 | -0.57 | O |
| ATOM | 2195 | N   | LEU | A | 287 | 20.453 | 6.895  | 14.892 | 1.00 | -0.42 | N |
| ATOM | 2196 | CA  | LEU | A | 287 | 20.629 | 5.760  | 15.803 | 1.00 | -0.05 | C |
| ATOM | 2197 | C   | LEU | A | 287 | 21.727 | 6.005  | 16.867 | 1.00 | 0.60  | C |
| ATOM | 2198 | O   | LEU | A | 287 | 21.824 | 5.233  | 17.818 | 1.00 | -0.57 | O |
| ATOM | 2199 | CB  | LEU | A | 287 | 20.891 | 4.499  | 14.957 | 1.00 | -0.11 | C |
| ATOM | 2200 | CG  | LEU | A | 287 | 20.956 | 3.160  | 15.720 | 1.00 | 0.35  | C |
| ATOM | 2201 | CD1 | LEU | A | 287 | 19.776 | 2.923  | 16.669 | 1.00 | -0.41 | C |
| ATOM | 2202 | CD2 | LEU | A | 287 | 20.968 | 2.012  | 14.706 | 1.00 | -0.41 | C |
| ATOM | 2203 | N   | ALA | A | 288 | 22.560 | 7.047  | 16.729 | 1.00 | -0.42 | N |
| ATOM | 2204 | CA  | ALA | A | 288 | 23.674 | 7.451  | 17.610 | 1.00 | 0.03  | C |
| ATOM | 2205 | C   | ALA | A | 288 | 24.807 | 6.422  | 17.858 | 1.00 | 0.60  | C |
| ATOM | 2206 | O   | ALA | A | 288 | 25.882 | 6.807  | 18.325 | 1.00 | -0.57 | O |
| ATOM | 2207 | CB  | ALA | A | 288 | 23.110 | 8.008  | 18.924 | 1.00 | -0.18 | C |
| ATOM | 2208 | N   | SER | A | 289 | 24.598 | 5.138  | 17.540 | 1.00 | -0.42 | N |
| ATOM | 2209 | CA  | SER | A | 289 | 25.589 | 4.055  | 17.601 | 1.00 | -0.02 | C |
| ATOM | 2210 | C   | SER | A | 289 | 26.907 | 4.339  | 16.845 | 1.00 | 0.60  | C |
| ATOM | 2211 | O   | SER | A | 289 | 27.017 | 5.277  | 16.056 | 1.00 | -0.57 | O |
| ATOM | 2212 | CB  | SER | A | 289 | 24.946 | 2.752  | 17.092 | 1.00 | 0.21  | C |
| ATOM | 2213 | OG  | SER | A | 289 | 24.633 | 2.818  | 15.710 | 1.00 | -0.65 | O |
| ATOM | 2214 | N   | GLY | A | 290 | 27.931 | 3.502  | 17.064 | 1.00 | -0.42 | N |
| ATOM | 2215 | CA  | GLY | A | 290 | 29.215 | 3.595  | 16.356 | 1.00 | -0.03 | C |
| ATOM | 2216 | C   | GLY | A | 290 | 29.083 | 3.261  | 14.865 | 1.00 | 0.60  | C |
| ATOM | 2217 | O   | GLY | A | 290 | 28.554 | 2.205  | 14.503 | 1.00 | -0.57 | O |
| ATOM | 2218 | N   | ARG | A | 291 | 29.546 | 4.174  | 14.001 | 1.00 | -0.35 | N |
| ATOM | 2219 | CA  | ARG | A | 291 | 29.230 | 4.162  | 12.568 | 1.00 | -0.26 | C |
| ATOM | 2220 | C   | ARG | A | 291 | 30.477 | 4.167  | 11.671 | 1.00 | 0.73  | C |
| ATOM | 2221 | O   | ARG | A | 291 | 31.287 | 5.099  | 11.676 | 1.00 | -0.59 | O |
| ATOM | 2222 | CB  | ARG | A | 291 | 28.266 | 5.315  | 12.245 | 1.00 | -0.00 | C |
| ATOM | 2223 | CG  | ARG | A | 291 | 26.834 | 4.924  | 12.648 | 1.00 | 0.04  | C |
| ATOM | 2224 | CD  | ARG | A | 291 | 25.845 | 6.085  | 12.601 | 1.00 | 0.05  | C |
| ATOM | 2225 | NE  | ARG | A | 291 | 25.521 | 6.463  | 11.215 | 1.00 | -0.53 | N |
| ATOM | 2226 | CZ  | ARG | A | 291 | 25.955 | 7.515  | 10.536 | 1.00 | 0.81  | C |
| ATOM | 2227 | NH1 | ARG | A | 291 | 25.461 | 7.756  | 9.344  | 1.00 | -0.86 | N |
| ATOM | 2228 | NH2 | ARG | A | 291 | 26.873 | 8.332  | 11.010 | 1.00 | -0.86 | N |
| ATOM | 2229 | N   | ILE | A | 292 | 30.579 | 3.084  | 10.893 | 1.00 | -0.42 | N |
| ATOM | 2230 | CA  | ILE | A | 292 | 31.671 | 2.731  | 9.981  | 1.00 | -0.06 | C |
| ATOM | 2231 | C   | ILE | A | 292 | 31.255 | 3.062  | 8.533  | 1.00 | 0.60  | C |

|      |      |     |     |   |     |        |        |         |      |       |   |
|------|------|-----|-----|---|-----|--------|--------|---------|------|-------|---|
| ATOM | 2232 | O   | ILE | A | 292 | 30.545 | 2.306  | 7.856   | 1.00 | -0.57 | O |
| ATOM | 2233 | CB  | ILE | A | 292 | 32.058 | 1.241  | 10.184  | 1.00 | 0.13  | C |
| ATOM | 2234 | CG1 | ILE | A | 292 | 32.321 | 0.851  | 11.662  | 1.00 | -0.04 | C |
| ATOM | 2235 | CG2 | ILE | A | 292 | 33.262 | 0.852  | 9.309   | 1.00 | -0.32 | C |
| ATOM | 2236 | CD1 | ILE | A | 292 | 33.279 | 1.770  | 12.435  | 1.00 | -0.07 | C |
| ATOM | 2237 | N   | ILE | A | 293 | 31.686 | 4.250  | 8.095   | 1.00 | -0.42 | N |
| ATOM | 2238 | CA  | ILE | A | 293 | 31.376 | 4.898  | 6.817   | 1.00 | -0.06 | C |
| ATOM | 2239 | C   | ILE | A | 293 | 32.428 | 4.484  | 5.762   | 1.00 | 0.60  | C |
| ATOM | 2240 | O   | ILE | A | 293 | 33.342 | 5.238  | 5.410   | 1.00 | -0.57 | O |
| ATOM | 2241 | CB  | ILE | A | 293 | 31.274 | 6.441  | 7.001   | 1.00 | 0.13  | C |
| ATOM | 2242 | CG1 | ILE | A | 293 | 30.453 | 6.920  | 8.225   | 1.00 | -0.04 | C |
| ATOM | 2243 | CG2 | ILE | A | 293 | 30.774 | 7.142  | 5.723   | 1.00 | -0.32 | C |
| ATOM | 2244 | CD1 | ILE | A | 293 | 28.988 | 6.479  | 8.273   | 1.00 | -0.07 | C |
| ATOM | 2245 | N   | LEU | A | 294 | 32.304 | 3.254  | 5.254   | 1.00 | -0.42 | N |
| ATOM | 2246 | CA  | LEU | A | 294 | 33.147 | 2.718  | 4.168   | 1.00 | -0.05 | C |
| ATOM | 2247 | C   | LEU | A | 294 | 32.885 | 3.355  | 2.775   | 1.00 | 0.60  | C |
| ATOM | 2248 | O   | LEU | A | 294 | 33.549 | 3.038  | 1.793   | 1.00 | -0.57 | O |
| ATOM | 2249 | CB  | LEU | A | 294 | 32.905 | 1.204  | 4.076   | 1.00 | -0.11 | C |
| ATOM | 2250 | CG  | LEU | A | 294 | 33.347 | 0.328  | 5.248   | 1.00 | 0.35  | C |
| ATOM | 2251 | CD1 | LEU | A | 294 | 33.548 | -1.117 | 4.790   | 1.00 | -0.41 | C |
| ATOM | 2252 | CD2 | LEU | A | 294 | 34.638 | 0.792  | 5.928   | 1.00 | -0.41 | C |
| ATOM | 2253 | N   | ILE | A | 295 | 31.870 | 4.212  | 2.678   | 1.00 | -0.42 | N |
| ATOM | 2254 | CA  | ILE | A | 295 | 30.762 | 4.075  | 1.721   | 1.00 | -0.06 | C |
| ATOM | 2255 | C   | ILE | A | 295 | 31.016 | 4.022  | 0.195   | 1.00 | 0.60  | C |
| ATOM | 2256 | O   | ILE | A | 295 | 30.110 | 3.584  | -0.504  | 1.00 | -0.57 | O |
| ATOM | 2257 | CB  | ILE | A | 295 | 29.689 | 5.144  | 2.032   | 1.00 | 0.13  | C |
| ATOM | 2258 | CG1 | ILE | A | 295 | 30.182 | 6.597  | 1.866   | 1.00 | -0.04 | C |
| ATOM | 2259 | CG2 | ILE | A | 295 | 29.088 | 4.908  | 3.420   | 1.00 | -0.32 | C |
| ATOM | 2260 | CD1 | ILE | A | 295 | 29.029 | 7.606  | 1.785   | 1.00 | -0.07 | C |
| ATOM | 2261 | N   | LEU | A | 296 | 32.154 | 4.473  | -0.350  | 1.00 | -0.42 | N |
| ATOM | 2262 | CA  | LEU | A | 296 | 32.276 | 4.754  | -1.798  | 1.00 | -0.05 | C |
| ATOM | 2263 | C   | LEU | A | 296 | 32.446 | 3.513  | -2.711  | 1.00 | 0.60  | C |
| ATOM | 2264 | O   | LEU | A | 296 | 33.530 | 3.242  | -3.234  | 1.00 | -0.57 | O |
| ATOM | 2265 | CB  | LEU | A | 296 | 33.265 | 5.915  | -2.069  | 1.00 | -0.11 | C |
| ATOM | 2266 | CG  | LEU | A | 296 | 32.549 | 7.166  | -2.617  | 1.00 | 0.35  | C |
| ATOM | 2267 | CD1 | LEU | A | 296 | 31.696 | 7.813  | -1.528  | 1.00 | -0.41 | C |
| ATOM | 2268 | CD2 | LEU | A | 296 | 33.535 | 8.226  | -3.110  | 1.00 | -0.41 | C |
| ATOM | 2269 | N   | GLU | A | 297 | 31.340 | 2.788  | -2.915  | 1.00 | -0.52 | N |
| ATOM | 2270 | CA  | GLU | A | 297 | 31.185 | 1.643  | -3.835  | 1.00 | 0.04  | C |
| ATOM | 2271 | C   | GLU | A | 297 | 30.922 | 2.103  | -5.287  | 1.00 | 0.54  | C |
| ATOM | 2272 | O   | GLU | A | 297 | 31.634 | 2.998  | -5.762  | 1.00 | -0.58 | O |
| ATOM | 2273 | CB  | GLU | A | 297 | 30.057 | 0.732  | -3.272  | 1.00 | 0.06  | C |
| ATOM | 2274 | CG  | GLU | A | 297 | 30.354 | 0.174  | -1.872  | 1.00 | 0.01  | C |
| ATOM | 2275 | CD  | GLU | A | 297 | 29.135 | -0.330 | -1.093  | 1.00 | 0.81  | C |
| ATOM | 2276 | OE1 | GLU | A | 297 | 28.065 | 0.328  | -1.141  | 1.00 | -0.82 | O |
| ATOM | 2277 | OE2 | GLU | A | 297 | 29.302 | -1.312 | -0.338  | 1.00 | -0.82 | O |
| ATOM | 2278 | N   | GLY | A | 298 | 29.981 | 1.467  | -6.015  | 1.00 | -0.42 | N |
| ATOM | 2279 | CA  | GLY | A | 298 | 29.716 | 1.697  | -7.443  | 1.00 | -0.03 | C |
| ATOM | 2280 | C   | GLY | A | 298 | 29.553 | 3.173  | -7.828  | 1.00 | 0.60  | C |
| ATOM | 2281 | O   | GLY | A | 298 | 29.072 | 3.982  | -7.039  | 1.00 | -0.57 | O |
| ATOM | 2282 | N   | GLY | A | 299 | 29.972 | 3.556  | -9.036  | 1.00 | -0.42 | N |
| ATOM | 2283 | CA  | GLY | A | 299 | 29.884 | 4.930  | -9.543  | 1.00 | -0.03 | C |
| ATOM | 2284 | C   | GLY | A | 299 | 31.084 | 5.321  | -10.410 | 1.00 | 0.60  | C |
| ATOM | 2285 | O   | GLY | A | 299 | 32.240 | 5.033  | -10.067 | 1.00 | -0.57 | O |
| ATOM | 2286 | N   | TYR | A | 300 | 30.786 | 5.968  | -11.539 | 1.00 | -0.42 | N |
| ATOM | 2287 | CA  | TYR | A | 300 | 31.702 | 6.147  | -12.670 | 1.00 | -0.00 | C |
| ATOM | 2288 | C   | TYR | A | 300 | 31.628 | 7.563  | -13.274 | 1.00 | 0.60  | C |
| ATOM | 2289 | O   | TYR | A | 300 | 32.595 | 7.986  | -13.912 | 1.00 | -0.57 | O |
| ATOM | 2290 | CB  | TYR | A | 300 | 31.408 | 5.005  | -13.702 | 1.00 | -0.02 | C |
| ATOM | 2291 | CG  | TYR | A | 300 | 30.817 | 3.700  | -13.120 | 1.00 | -0.00 | C |
| ATOM | 2292 | CD1 | TYR | A | 300 | 29.414 | 3.508  | -13.118 | 1.00 | -0.19 | C |
| ATOM | 2293 | CD2 | TYR | A | 300 | 31.624 | 2.799  | -12.384 | 1.00 | -0.19 | C |
| ATOM | 2294 | CE1 | TYR | A | 300 | 28.816 | 2.500  | -12.325 | 1.00 | -0.23 | C |
| ATOM | 2295 | CE2 | TYR | A | 300 | 31.033 | 1.768  | -11.608 | 1.00 | -0.23 | C |
| ATOM | 2296 | CZ  | TYR | A | 300 | 29.619 | 1.641  | -11.537 | 1.00 | 0.32  | C |
| ATOM | 2297 | OH  | TYR | A | 300 | 29.065 | 0.769  | -10.639 | 1.00 | -0.56 | O |
| ATOM | 2298 | N   | ASN | A | 301 | 30.548 | 8.332  | -13.046 | 1.00 | -0.42 | N |
| ATOM | 2299 | CA  | ASN | A | 301 | 30.598 | 9.791  | -13.206 | 1.00 | 0.01  | C |
| ATOM | 2300 | C   | ASN | A | 301 | 31.595 | 10.414 | -12.193 | 1.00 | 0.60  | C |
| ATOM | 2301 | O   | ASN | A | 301 | 31.262 | 10.651 | -11.026 | 1.00 | -0.57 | O |
| ATOM | 2302 | CB  | ASN | A | 301 | 29.173 | 10.374 | -13.157 | 1.00 | -0.20 | C |
| ATOM | 2303 | CG  | ASN | A | 301 | 29.101 | 11.898 | -13.231 | 1.00 | 0.71  | C |
| ATOM | 2304 | ND2 | ASN | A | 301 | 28.151 | 12.457 | -13.955 | 1.00 | -0.92 | N |
| ATOM | 2305 | OD1 | ASN | A | 301 | 29.898 | 12.616 | -12.642 | 1.00 | -0.59 | O |
| ATOM | 2306 | N   | LEU | A | 302 | 32.823 | 10.673 | -12.675 | 1.00 | -0.42 | N |
| ATOM | 2307 | CA  | LEU | A | 302 | 33.957 | 11.258 | -11.944 | 1.00 | -0.05 | C |
| ATOM | 2308 | C   | LEU | A | 302 | 33.720 | 12.669 | -11.353 | 1.00 | 0.60  | C |

|      |      |     |     |   |     |        |        |         |      |       |   |
|------|------|-----|-----|---|-----|--------|--------|---------|------|-------|---|
| ATOM | 2309 | O   | LEU | A | 302 | 34.631 | 13.217 | -10.732 | 1.00 | -0.57 | O |
| ATOM | 2310 | CB  | LEU | A | 302 | 35.236 | 11.252 | -12.818 | 1.00 | -0.11 | C |
| ATOM | 2311 | CG  | LEU | A | 302 | 35.737 | 9.891  | -13.349 | 1.00 | 0.35  | C |
| ATOM | 2312 | CD1 | LEU | A | 302 | 37.167 | 10.038 | -13.877 | 1.00 | -0.41 | C |
| ATOM | 2313 | CD2 | LEU | A | 302 | 35.745 | 8.790  | -12.292 | 1.00 | -0.41 | C |
| ATOM | 2314 | N   | THR | A | 303 | 32.533 | 13.267 | -11.486 | 1.00 | -0.42 | N |
| ATOM | 2315 | CA  | THR | A | 303 | 32.191 | 14.498 | -10.756 | 1.00 | -0.04 | C |
| ATOM | 2316 | C   | THR | A | 303 | 31.140 | 14.184 | -9.687  | 1.00 | 0.60  | C |
| ATOM | 2317 | O   | THR | A | 303 | 31.367 | 14.474 | -8.511  | 1.00 | -0.57 | O |
| ATOM | 2318 | CB  | THR | A | 303 | 31.761 | 15.622 | -11.720 | 1.00 | 0.37  | C |
| ATOM | 2319 | CG2 | THR | A | 303 | 31.382 | 16.912 | -10.987 | 1.00 | -0.24 | C |
| ATOM | 2320 | OG1 | THR | A | 303 | 32.825 | 15.944 | -12.603 | 1.00 | -0.68 | O |
| ATOM | 2321 | N   | SER | A | 304 | 30.038 | 13.518 | -10.051 | 1.00 | -0.42 | N |
| ATOM | 2322 | CA  | SER | A | 304 | 28.967 | 13.166 | -9.120  | 1.00 | -0.02 | C |
| ATOM | 2323 | C   | SER | A | 304 | 29.451 | 12.263 | -7.966  | 1.00 | 0.60  | C |
| ATOM | 2324 | O   | SER | A | 304 | 29.056 | 12.480 | -6.819  | 1.00 | -0.57 | O |
| ATOM | 2325 | CB  | SER | A | 304 | 27.803 | 12.544 | -9.896  | 1.00 | 0.21  | C |
| ATOM | 2326 | OG  | SER | A | 304 | 26.642 | 12.534 | -9.090  | 1.00 | -0.65 | O |
| ATOM | 2327 | N   | ILE | A | 305 | 30.379 | 11.321 | -8.228  | 1.00 | -0.42 | N |
| ATOM | 2328 | CA  | ILE | A | 305 | 31.000 | 10.476 | -7.184  | 1.00 | -0.06 | C |
| ATOM | 2329 | C   | ILE | A | 305 | 31.632 | 11.293 | -6.034  | 1.00 | 0.60  | C |
| ATOM | 2330 | O   | ILE | A | 305 | 31.603 | 10.881 | -4.872  | 1.00 | -0.57 | O |
| ATOM | 2331 | CB  | ILE | A | 305 | 32.028 | 9.513  | -7.839  | 1.00 | 0.13  | C |
| ATOM | 2332 | CG1 | ILE | A | 305 | 32.570 | 8.432  | -6.884  | 1.00 | -0.04 | C |
| ATOM | 2333 | CG2 | ILE | A | 305 | 33.253 | 10.237 | -8.433  | 1.00 | -0.32 | C |
| ATOM | 2334 | CD1 | ILE | A | 305 | 31.489 | 7.512  | -6.320  | 1.00 | -0.07 | C |
| ATOM | 2335 | N   | SER | A | 306 | 32.165 | 12.468 | -6.382  | 1.00 | -0.42 | N |
| ATOM | 2336 | CA  | SER | A | 306 | 32.891 | 13.375 | -5.504  | 1.00 | -0.02 | C |
| ATOM | 2337 | C   | SER | A | 306 | 31.961 | 14.464 | -4.919  | 1.00 | 0.60  | C |
| ATOM | 2338 | O   | SER | A | 306 | 31.894 | 14.687 | -3.706  | 1.00 | -0.57 | O |
| ATOM | 2339 | CB  | SER | A | 306 | 34.032 | 13.954 | -6.358  | 1.00 | 0.21  | C |
| ATOM | 2340 | OG  | SER | A | 306 | 34.876 | 14.803 | -5.625  | 1.00 | -0.65 | O |
| ATOM | 2341 | N   | GLU | A | 307 | 31.172 | 15.101 | -5.792  | 1.00 | -0.52 | N |
| ATOM | 2342 | CA  | GLU | A | 307 | 30.116 | 16.080 | -5.497  | 1.00 | 0.04  | C |
| ATOM | 2343 | C   | GLU | A | 307 | 29.039 | 15.529 | -4.551  | 1.00 | 0.54  | C |
| ATOM | 2344 | O   | GLU | A | 307 | 28.612 | 16.231 | -3.631  | 1.00 | -0.58 | O |
| ATOM | 2345 | CB  | GLU | A | 307 | 29.569 | 16.542 | -6.858  | 1.00 | 0.06  | C |
| ATOM | 2346 | CG  | GLU | A | 307 | 28.664 | 17.770 | -6.883  | 1.00 | 0.01  | C |
| ATOM | 2347 | CD  | GLU | A | 307 | 28.974 | 18.547 | -8.163  | 1.00 | 0.81  | C |
| ATOM | 2348 | OE1 | GLU | A | 307 | 29.832 | 19.457 | -8.072  | 1.00 | -0.82 | O |
| ATOM | 2349 | OE2 | GLU | A | 307 | 28.385 | 18.211 | -9.219  | 1.00 | -0.82 | O |
| ATOM | 2350 | N   | SER | A | 308 | 28.658 | 14.251 | -4.699  | 1.00 | -0.42 | N |
| ATOM | 2351 | CA  | SER | A | 308 | 27.802 | 13.576 | -3.724  | 1.00 | -0.02 | C |
| ATOM | 2352 | C   | SER | A | 308 | 28.538 | 13.205 | -2.428  | 1.00 | 0.60  | C |
| ATOM | 2353 | O   | SER | A | 308 | 28.010 | 13.466 | -1.346  | 1.00 | -0.57 | O |
| ATOM | 2354 | CB  | SER | A | 308 | 27.157 | 12.333 | -4.334  | 1.00 | 0.21  | C |
| ATOM | 2355 | OG  | SER | A | 308 | 26.192 | 11.837 | -3.424  | 1.00 | -0.65 | O |
| ATOM | 2356 | NA  | MET | A | 309 | 29.768 | 12.666 | -2.480  | 1.00 | -0.42 | N |
| ATOM | 2357 | CA  | MET | A | 309 | 30.511 | 12.349 | -1.252  | 1.00 | -0.02 | C |
| ATOM | 2358 | C   | MET | A | 309 | 30.791 | 13.591 | -0.387  | 1.00 | 0.60  | C |
| ATOM | 2359 | O   | MET | A | 309 | 30.819 | 13.495 | 0.843   | 1.00 | -0.57 | O |
| ATOM | 2360 | CB  | MET | A | 309 | 31.802 | 11.580 | -1.561  | 1.00 | 0.03  | C |
| ATOM | 2361 | CG  | MET | A | 309 | 32.532 | 11.094 | -0.293  | 1.00 | 0.00  | C |
| ATOM | 2362 | SD  | MET | A | 309 | 31.463 | 10.292 | 0.940   | 1.00 | -0.27 | S |
| ATOM | 2363 | CE  | MET | A | 309 | 32.562 | 10.030 | 2.352   | 1.00 | -0.05 | C |
| ATOM | 2364 | N   | ALA | A | 310 | 30.929 | 14.772 | -1.000  | 1.00 | -0.42 | N |
| ATOM | 2365 | CA  | ALA | A | 310 | 30.903 | 16.039 | -0.269  | 1.00 | 0.03  | C |
| ATOM | 2366 | C   | ALA | A | 310 | 29.609 | 16.225 | 0.562   | 1.00 | 0.60  | C |
| ATOM | 2367 | O   | ALA | A | 310 | 29.700 | 16.517 | 1.752   | 1.00 | -0.57 | O |
| ATOM | 2368 | CB  | ALA | A | 310 | 31.123 | 17.195 | -1.250  | 1.00 | -0.18 | C |
| ATOM | 2369 | N   | ALA | A | 311 | 28.412 | 15.994 | -0.004  | 1.00 | -0.42 | N |
| ATOM | 2370 | CA  | ALA | A | 311 | 27.152 | 16.061 | 0.758   | 1.00 | 0.03  | C |
| ATOM | 2371 | C   | ALA | A | 311 | 27.006 | 14.915 | 1.778   | 1.00 | 0.60  | C |
| ATOM | 2372 | O   | ALA | A | 311 | 26.595 | 15.150 | 2.916   | 1.00 | -0.57 | O |
| ATOM | 2373 | CB  | ALA | A | 311 | 25.957 | 16.051 | -0.198  | 1.00 | -0.18 | C |
| ATOM | 2374 | N   | CYS | A | 312 | 27.404 | 13.691 | 1.410   | 1.00 | -0.42 | N |
| ATOM | 2375 | CA  | CYS | A | 312 | 27.422 | 12.544 | 2.322   | 1.00 | 0.02  | C |
| ATOM | 2376 | C   | CYS | A | 312 | 28.324 | 12.819 | 3.544   | 1.00 | 0.60  | C |
| ATOM | 2377 | O   | CYS | A | 312 | 27.939 | 12.539 | 4.679   | 1.00 | -0.57 | O |
| ATOM | 2378 | CB  | CYS | A | 312 | 27.920 | 11.297 | 1.579   | 1.00 | -0.12 | C |
| ATOM | 2379 | SG  | CYS | A | 312 | 26.958 | 10.933 | 0.080   | 1.00 | -0.31 | S |
| ATOM | 2380 | N   | THR | A | 313 | 29.500 | 13.417 | 3.308   | 1.00 | -0.42 | N |
| ATOM | 2381 | CA  | THR | A | 313 | 30.445 | 13.807 | 4.363   | 1.00 | -0.04 | C |
| ATOM | 2382 | C   | THR | A | 313 | 29.943 | 15.032 | 5.133   | 1.00 | 0.60  | C |
| ATOM | 2383 | O   | THR | A | 313 | 30.073 | 15.081 | 6.354   | 1.00 | -0.57 | O |
| ATOM | 2384 | CB  | THR | A | 313 | 31.838 | 14.111 | 3.784   | 1.00 | 0.37  | C |
| ATOM | 2385 | CG2 | THR | A | 313 | 32.908 | 14.280 | 4.859   | 1.00 | -0.24 | C |



|        |      |     |     |   |     |        |        |        |      |       |    |
|--------|------|-----|-----|---|-----|--------|--------|--------|------|-------|----|
| ATOM   | 2386 | OG1 | THR | A | 313 | 32.273 | 13.091 | 2.927  | 1.00 | -0.68 | O  |
| ATOM   | 2387 | N   | ARG | A | 314 | 29.304 | 16.000 | 4.461  | 1.00 | -0.35 | N  |
| ATOM   | 2388 | CA  | ARG | A | 314 | 28.658 | 17.140 | 5.110  | 1.00 | -0.26 | C  |
| ATOM   | 2389 | C   | ARG | A | 314 | 27.607 | 16.660 | 6.129  | 1.00 | 0.73  | C  |
| ATOM   | 2390 | O   | ARG | A | 314 | 27.609 | 17.119 | 7.274  | 1.00 | -0.59 | O  |
| ATOM   | 2391 | CB  | ARG | A | 314 | 28.041 | 18.056 | 4.039  | 1.00 | -0.00 | C  |
| ATOM   | 2392 | CG  | ARG | A | 314 | 27.594 | 19.379 | 4.659  | 1.00 | 0.04  | C  |
| ATOM   | 2393 | CD  | ARG | A | 314 | 26.574 | 20.159 | 3.820  | 1.00 | 0.05  | C  |
| ATOM   | 2394 | NE  | ARG | A | 314 | 25.252 | 19.502 | 3.775  | 1.00 | -0.53 | N  |
| ATOM   | 2395 | CZ  | ARG | A | 314 | 24.393 | 19.367 | 4.779  | 1.00 | 0.81  | C  |
| ATOM   | 2396 | NH1 | ARG | A | 314 | 23.239 | 18.765 | 4.565  | 1.00 | -0.86 | N  |
| ATOM   | 2397 | NH2 | ARG | A | 314 | 24.644 | 19.808 | 6.002  | 1.00 | -0.86 | N  |
| ATOM   | 2398 | N   | SER | A | 315 | 26.791 | 15.662 | 5.759  | 1.00 | -0.42 | N  |
| ATOM   | 2399 | CA  | SER | A | 315 | 25.844 | 14.995 | 6.665  | 1.00 | -0.02 | C  |
| ATOM   | 2400 | C   | SER | A | 315 | 26.484 | 14.318 | 7.901  | 1.00 | 0.60  | C  |
| ATOM   | 2401 | O   | SER | A | 315 | 25.772 | 13.852 | 8.791  | 1.00 | -0.57 | O  |
| ATOM   | 2402 | CB  | SER | A | 315 | 25.002 | 13.979 | 5.884  | 1.00 | 0.21  | C  |
| ATOM   | 2403 | OG  | SER | A | 315 | 23.772 | 13.786 | 6.561  | 1.00 | -0.65 | O  |
| ATOM   | 2404 | N   | LEU | A | 316 | 27.823 | 14.282 | 8.000  | 1.00 | -0.42 | N  |
| ATOM   | 2405 | CA  | LEU | A | 316 | 28.564 | 13.776 | 9.161  | 1.00 | -0.05 | C  |
| ATOM   | 2406 | C   | LEU | A | 316 | 29.350 | 14.881 | 9.901  | 1.00 | 0.60  | C  |
| ATOM   | 2407 | O   | LEU | A | 316 | 30.019 | 14.575 | 10.887 | 1.00 | -0.57 | O  |
| ATOM   | 2408 | CB  | LEU | A | 316 | 29.524 | 12.666 | 8.689  | 1.00 | -0.11 | C  |
| ATOM   | 2409 | CG  | LEU | A | 316 | 28.831 | 11.457 | 8.037  | 1.00 | 0.35  | C  |
| ATOM   | 2410 | CD1 | LEU | A | 316 | 29.877 | 10.593 | 7.337  | 1.00 | -0.41 | C  |
| ATOM   | 2411 | CD2 | LEU | A | 316 | 28.078 | 10.582 | 9.044  | 1.00 | -0.41 | C  |
| ATOM   | 2412 | N   | LEU | A | 317 | 29.318 | 16.142 | 9.434  | 1.00 | -0.42 | N  |
| ATOM   | 2413 | CA  | LEU | A | 317 | 30.215 | 17.204 | 9.929  | 1.00 | -0.05 | C  |
| ATOM   | 2414 | C   | LEU | A | 317 | 29.576 | 18.600 | 10.052 | 1.00 | 0.60  | C  |
| ATOM   | 2415 | O   | LEU | A | 317 | 30.025 | 19.389 | 10.890 | 1.00 | -0.57 | O  |
| ATOM   | 2416 | CB  | LEU | A | 317 | 31.430 | 17.323 | 8.988  | 1.00 | -0.11 | C  |
| ATOM   | 2417 | CG  | LEU | A | 317 | 32.329 | 16.079 | 8.845  | 1.00 | 0.35  | C  |
| ATOM   | 2418 | CD1 | LEU | A | 317 | 33.401 | 16.390 | 7.802  | 1.00 | -0.41 | C  |
| ATOM   | 2419 | CD2 | LEU | A | 317 | 33.050 | 15.692 | 10.137 | 1.00 | -0.41 | C  |
| ATOM   | 2420 | N   | GLY | A | 318 | 28.583 | 18.930 | 9.209  | 1.00 | -0.46 | N  |
| ATOM   | 2421 | CA  | GLY | A | 318 | 27.923 | 20.242 | 9.148  | 1.00 | 0.04  | C  |
| ATOM   | 2422 | C   | GLY | A | 318 | 28.023 | 20.861 | 7.757  | 1.00 | 0.79  | C  |
| ATOM   | 2423 | O   | GLY | A | 318 | 26.945 | 21.017 | 7.129  | 1.00 | -0.46 | O  |
| ATOM   | 2424 | OXT | GLY | A | 318 | 29.186 | 21.151 | 7.365  | 1.00 | -0.57 | O  |
| TER    | 2425 |     | GLY | A | 318 |        |        |        |      |       |    |
| HETATM | 2426 | ZN  | ZN  | A | 378 | 26.343 | -0.007 | -8.207 | 1.00 | 0.00  | ZN |
| END    |      |     |     |   |     |        |        |        |      |       |    |

4.  $^1\text{H}$  (400 MHz) and  $^{13}\text{C}$  NMR (100 MHz) spectra for new products in  $\text{CDCl}_3$

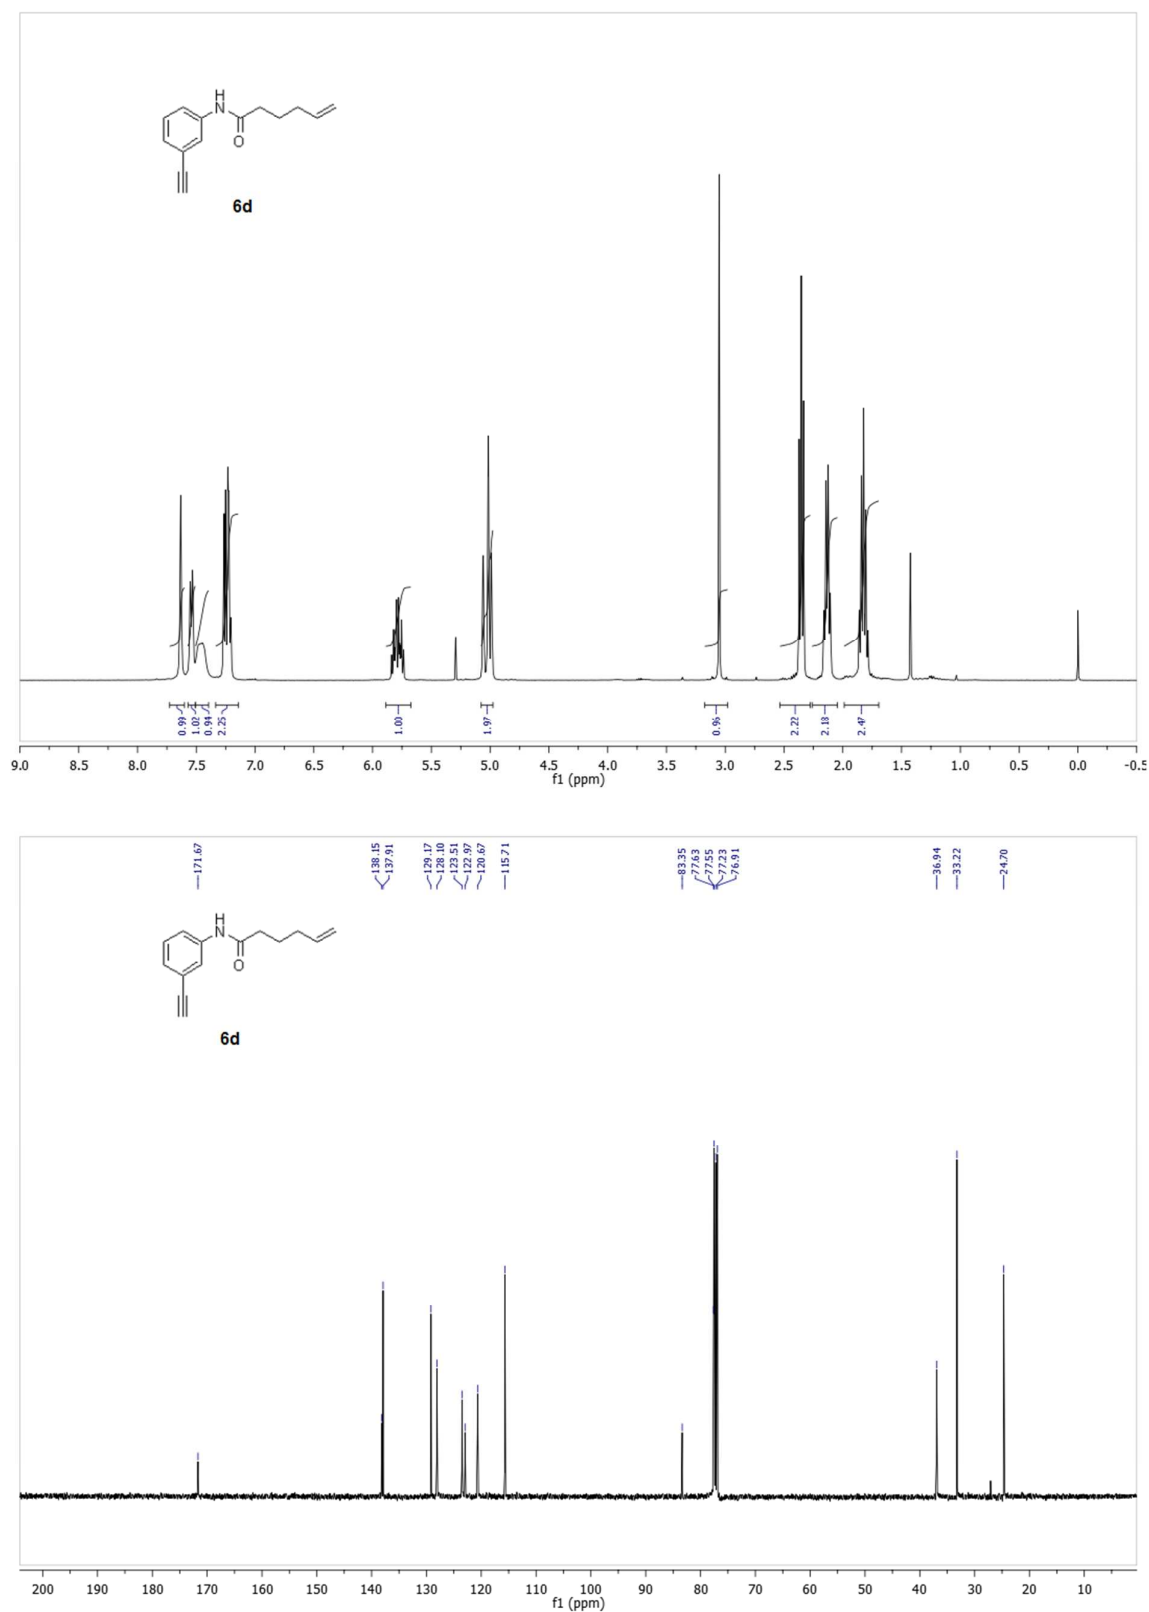

Figure S14:  $^1\text{H}$  and  $^{13}\text{C}$  NMR of product **6d**

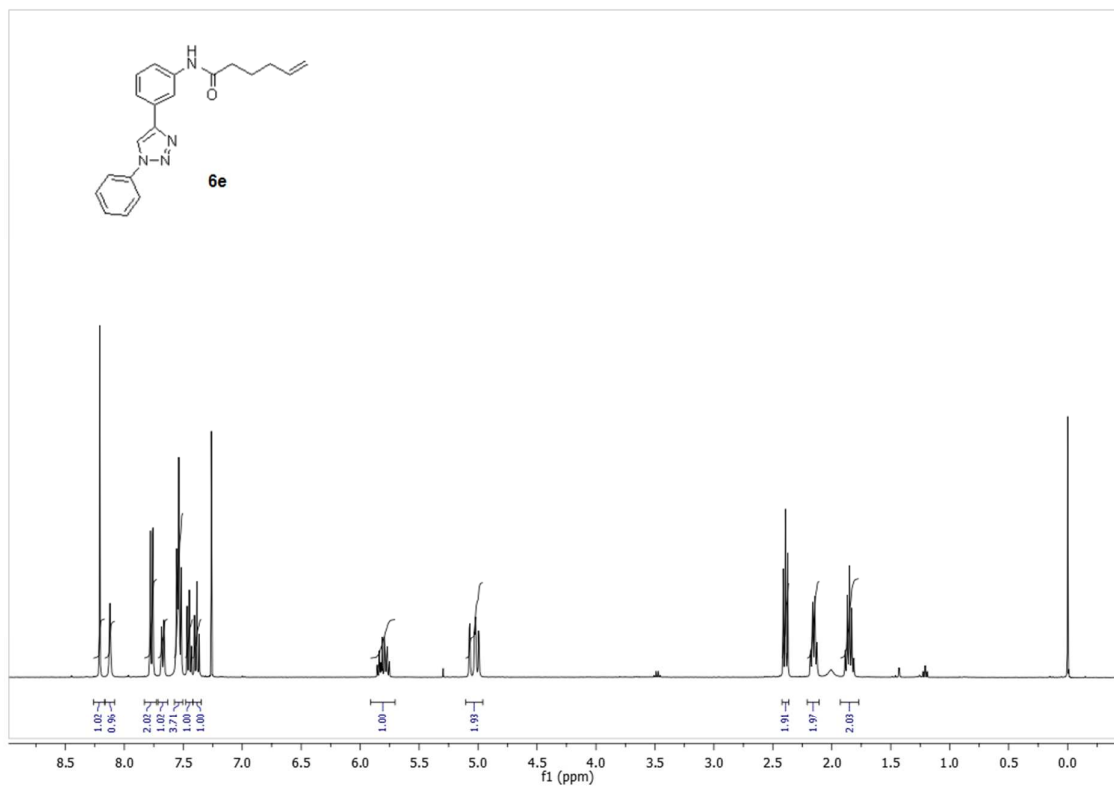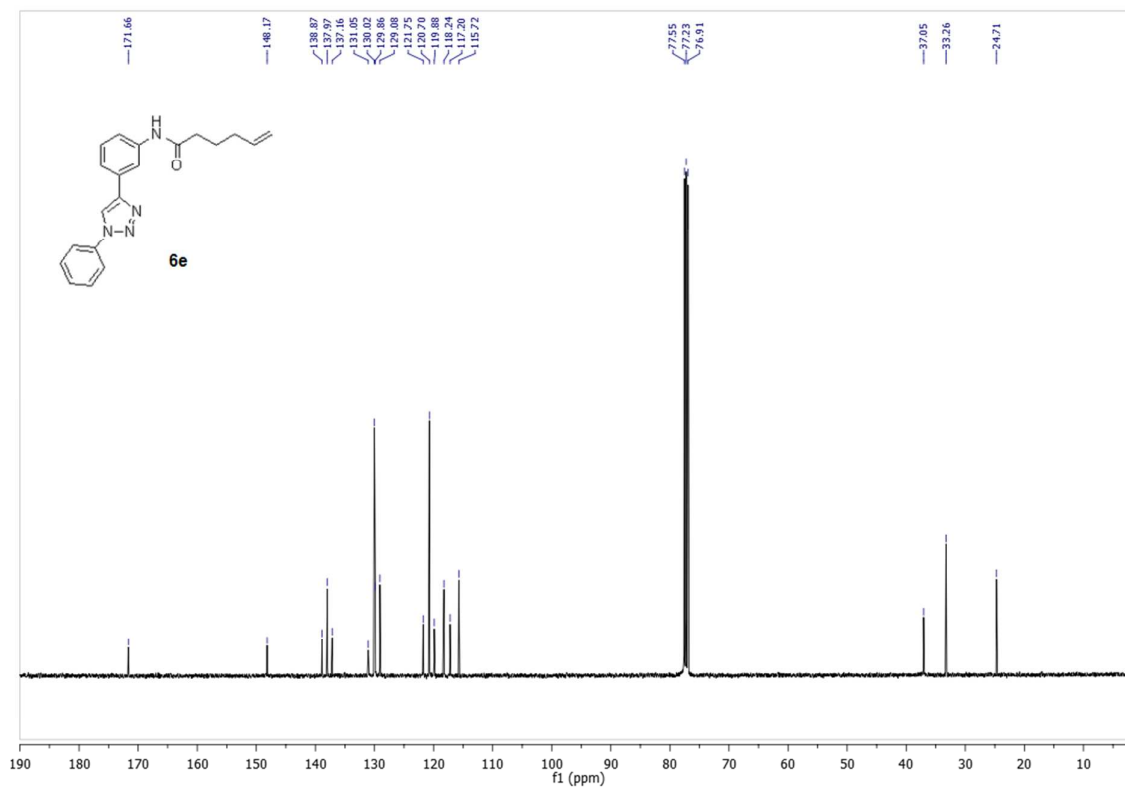

Figure S15:  $^1\text{H}$  and  $^{13}\text{C}$  NMR of product **6e**

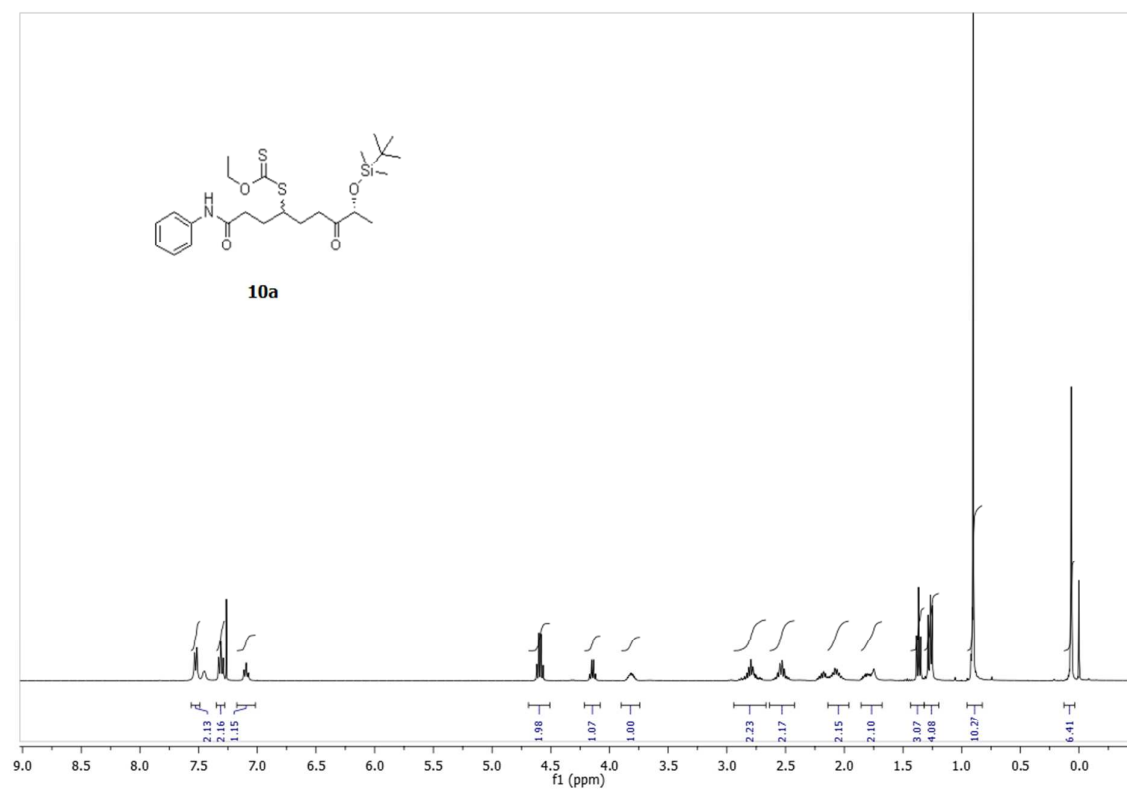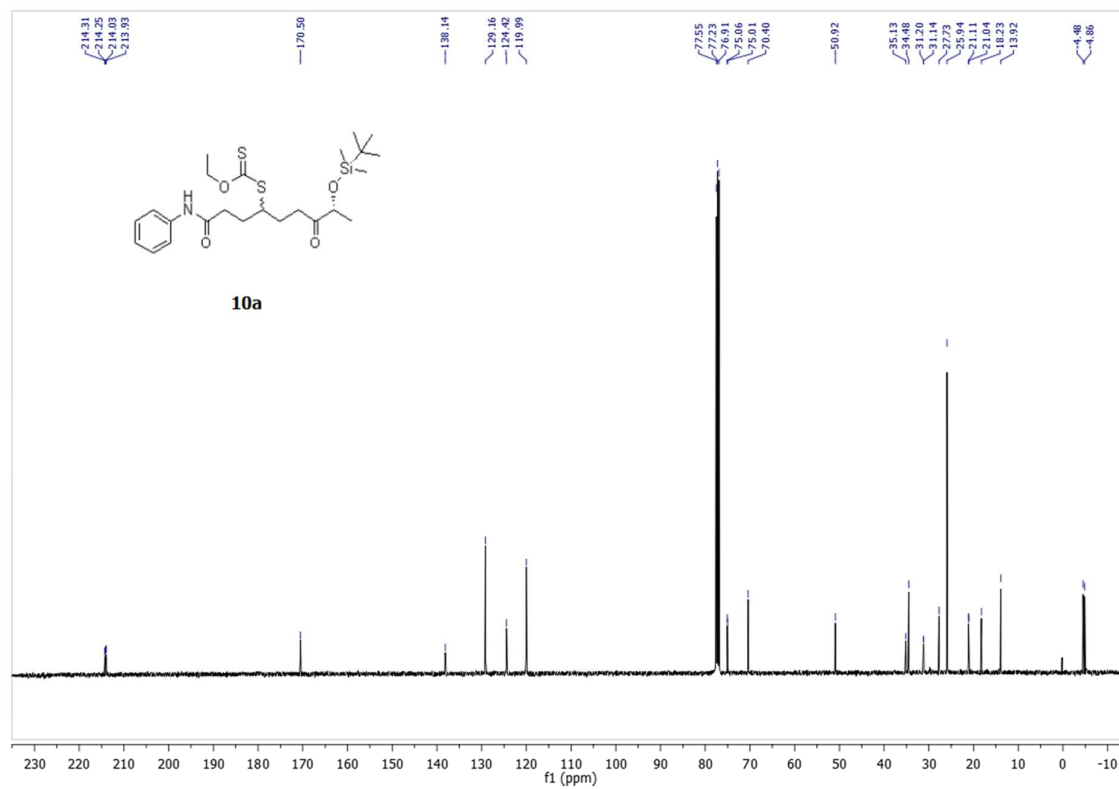

Figure S16: <sup>1</sup>H and <sup>13</sup>C NMR of product **10a**

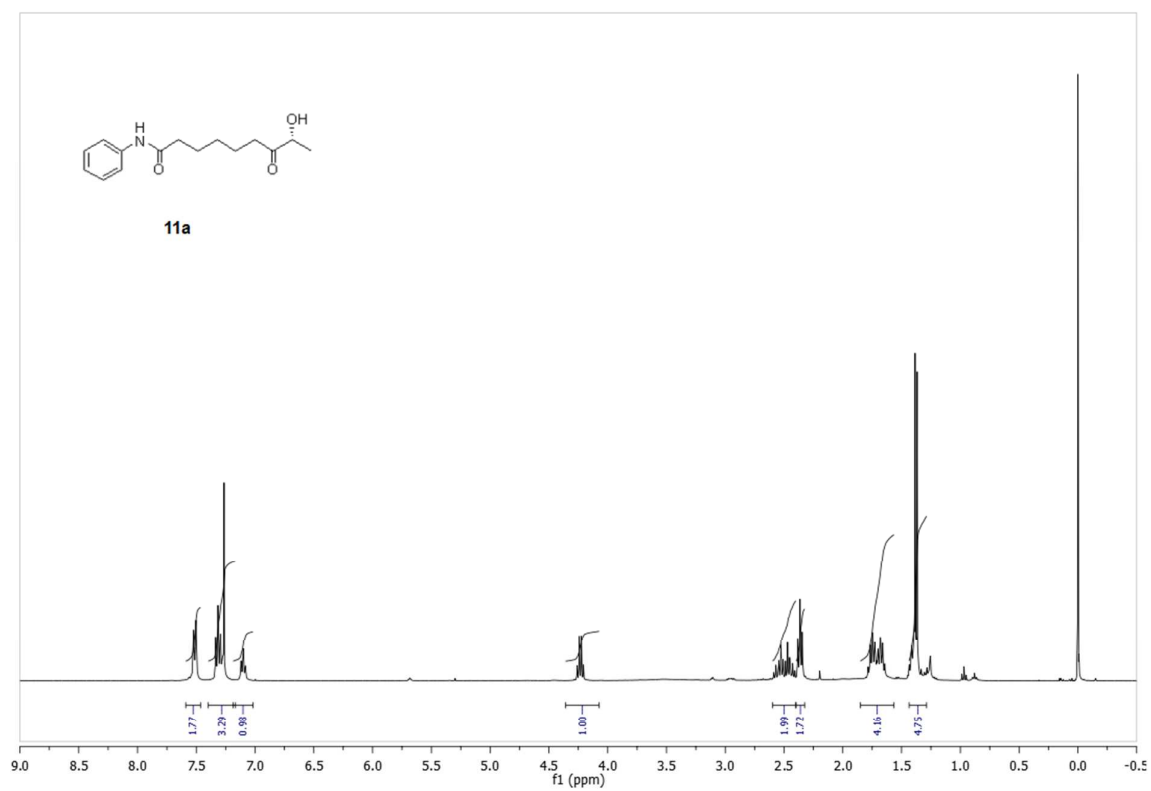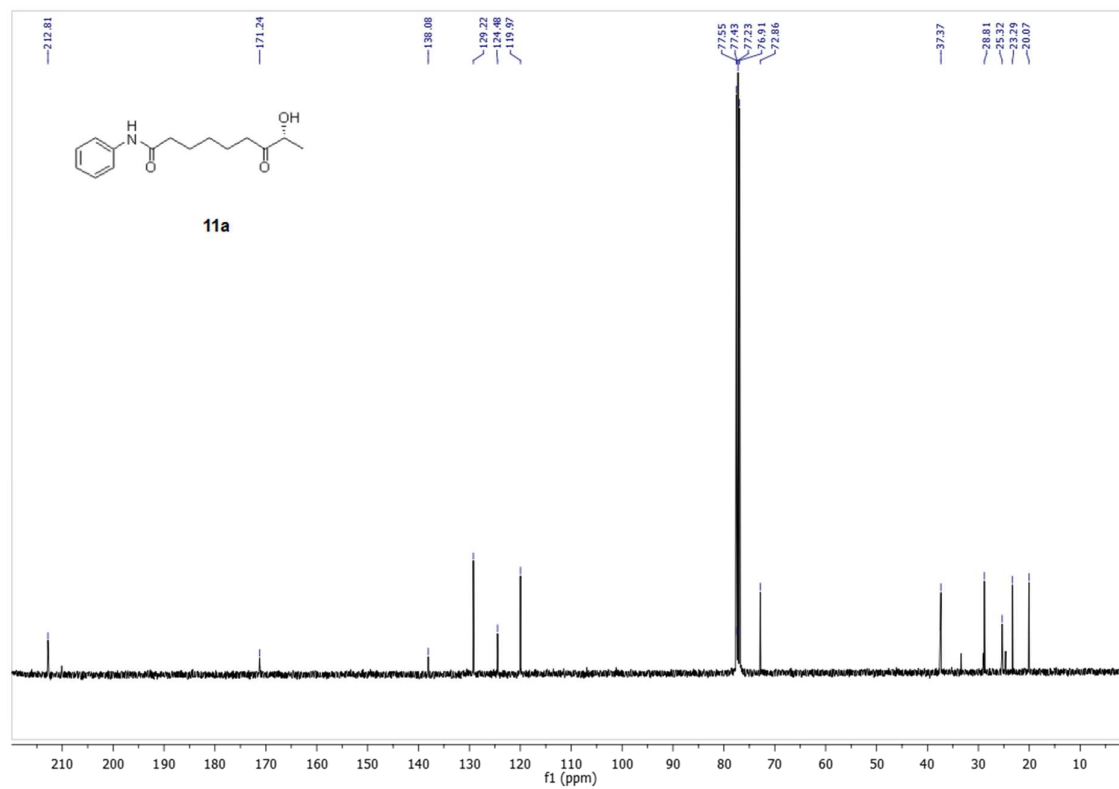

Figure S17:  $^1\text{H}$  and  $^{13}\text{C}$  NMR of product **11a**

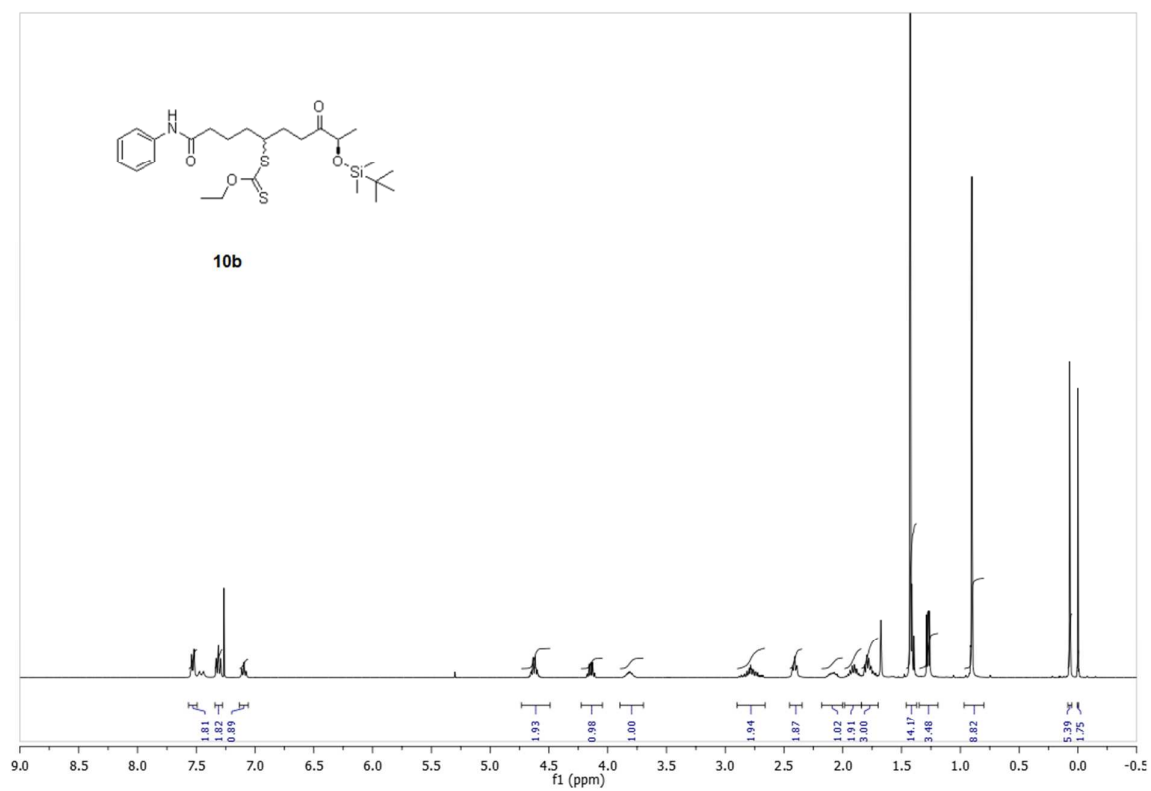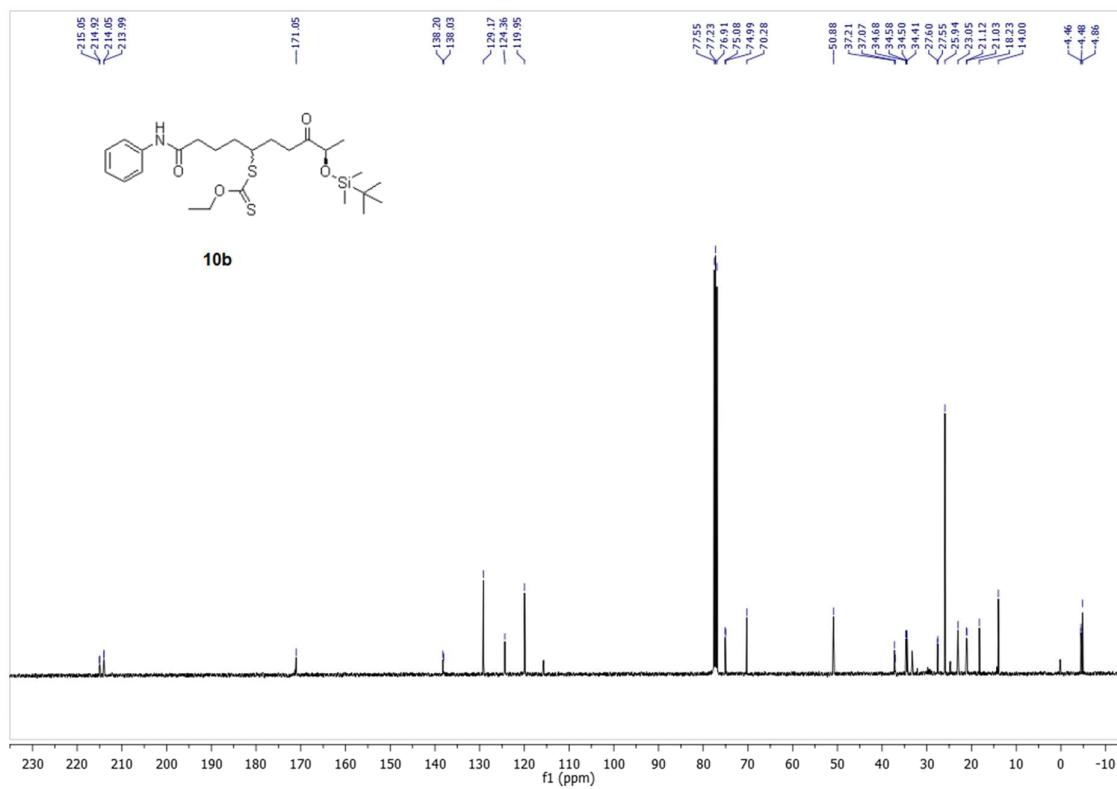

**Figure S18:**  $^1\text{H}$  and  $^{13}\text{C}$  NMR of product **10b**

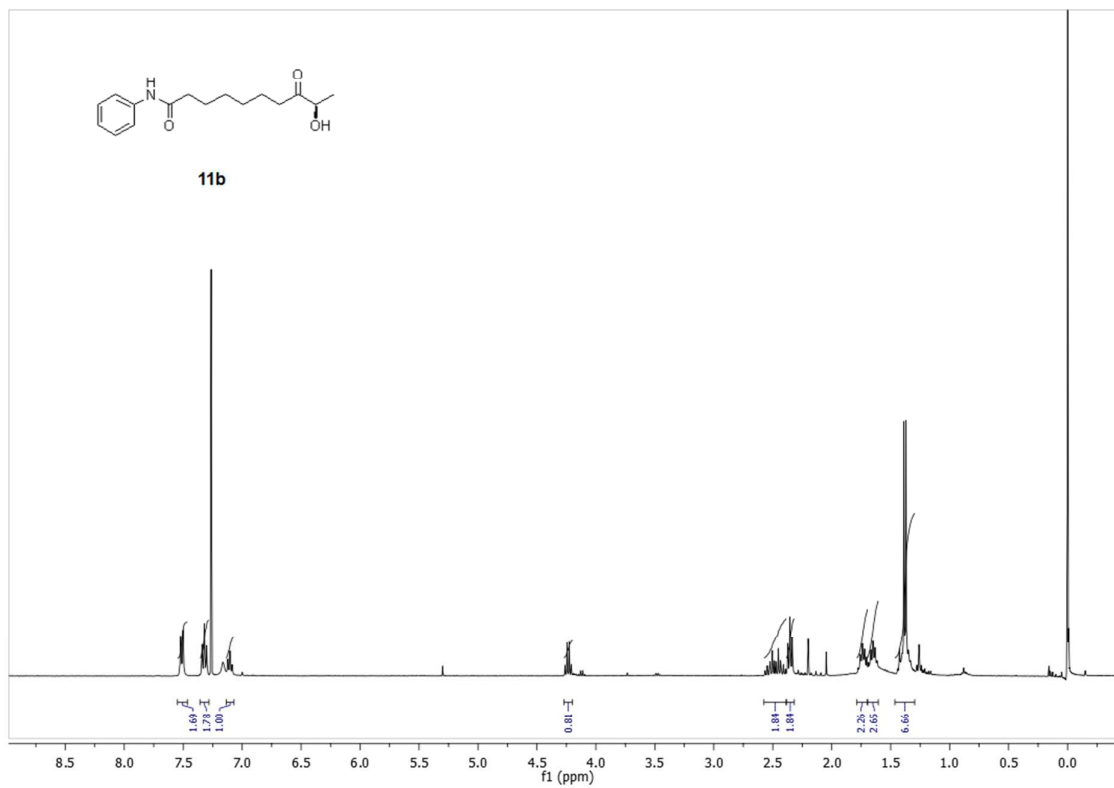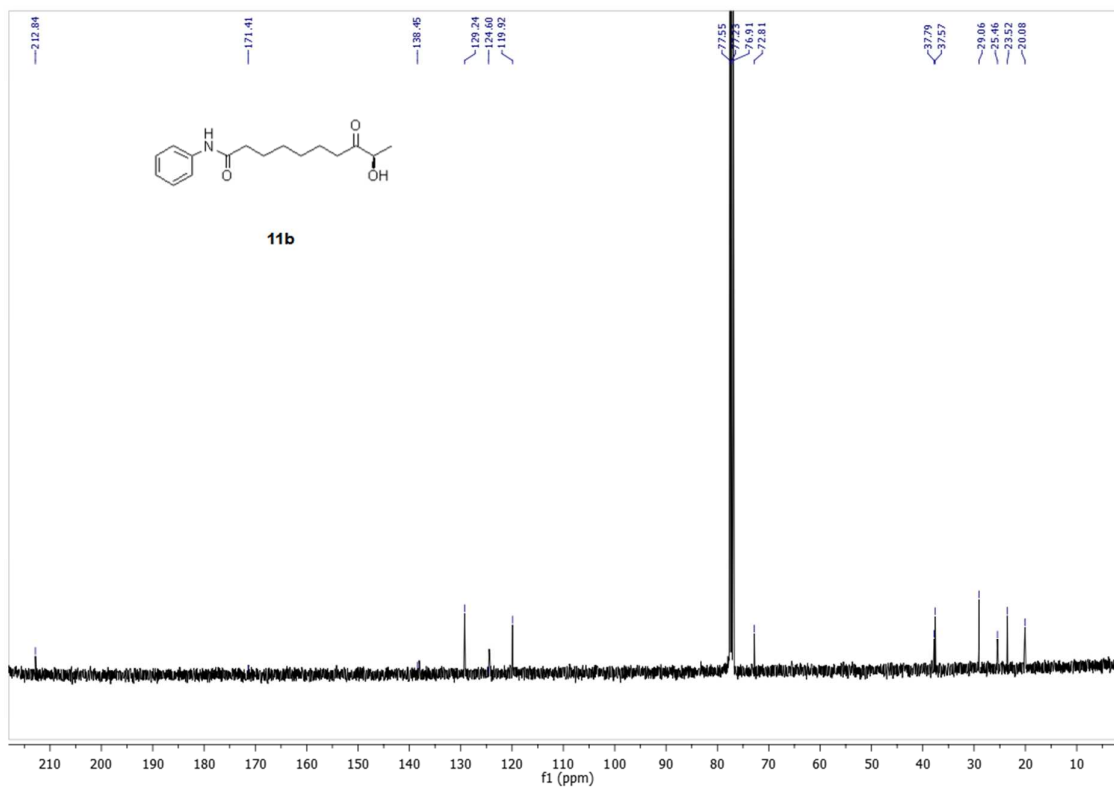

**Figure S19:**  $^1\text{H}$  and  $^{13}\text{C}$  NMR of product **11b**

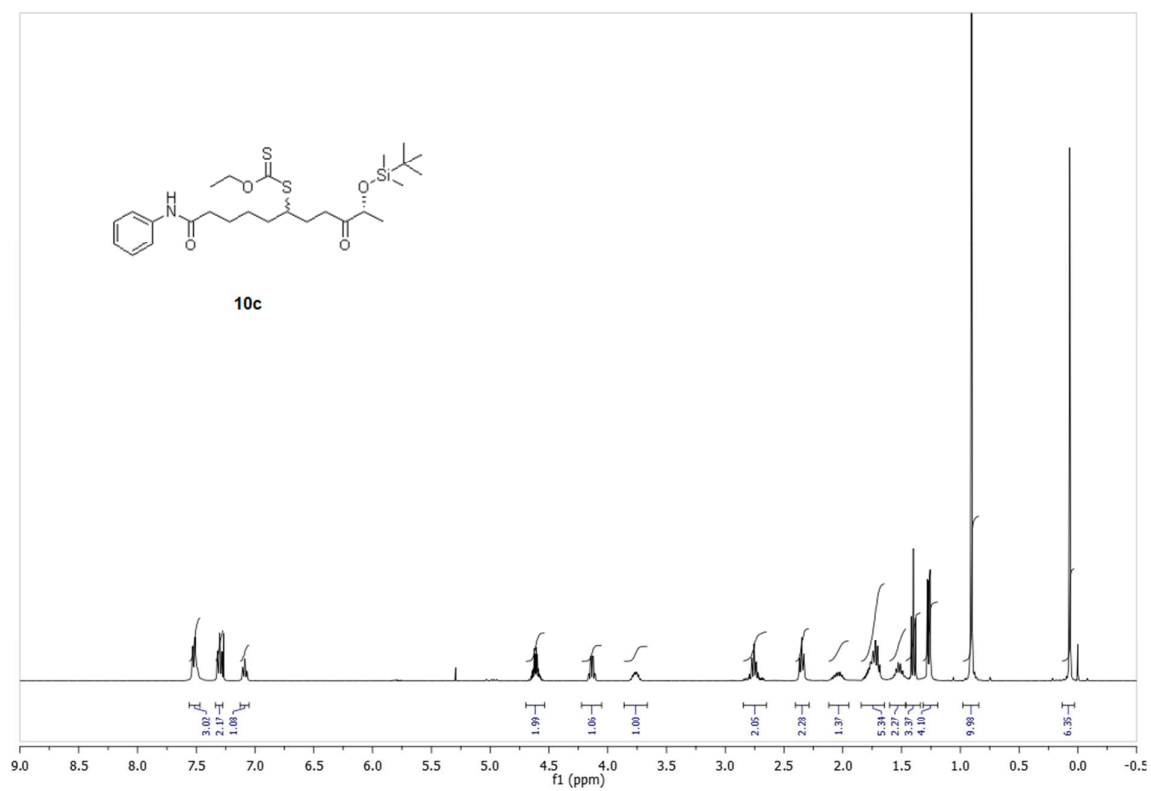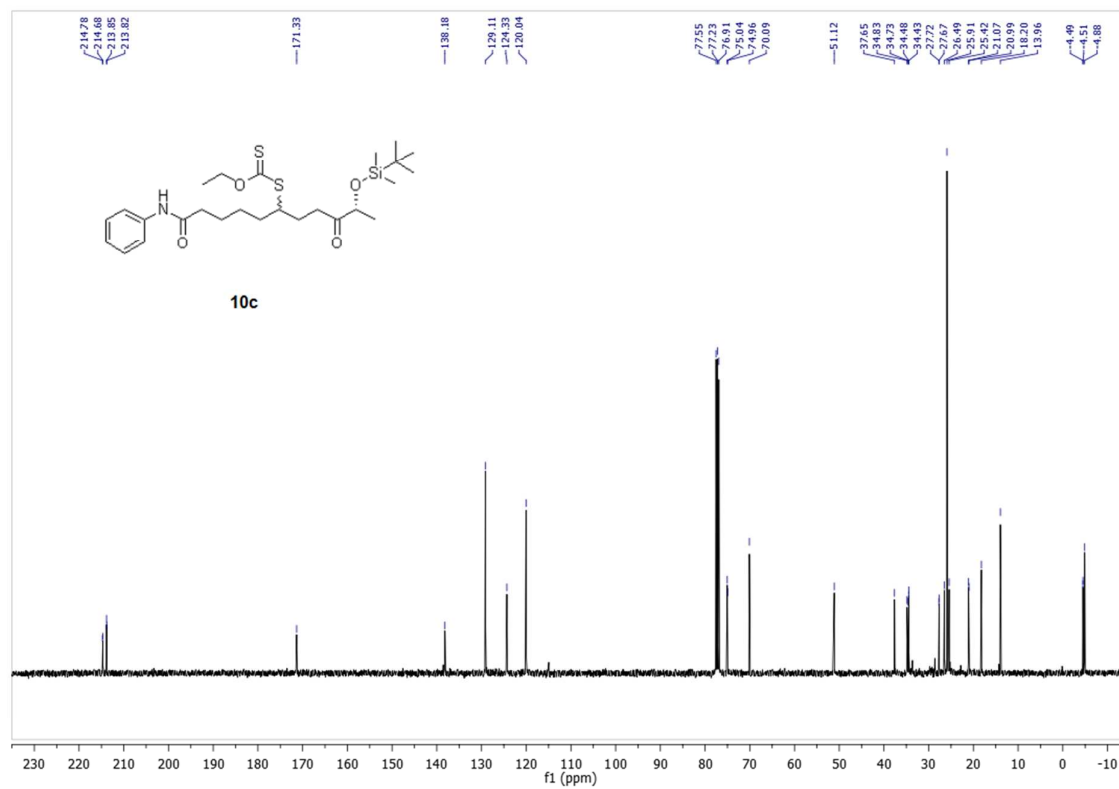

Figure S20:  $^1\text{H}$  and  $^{13}\text{C}$  NMR of product **10c**



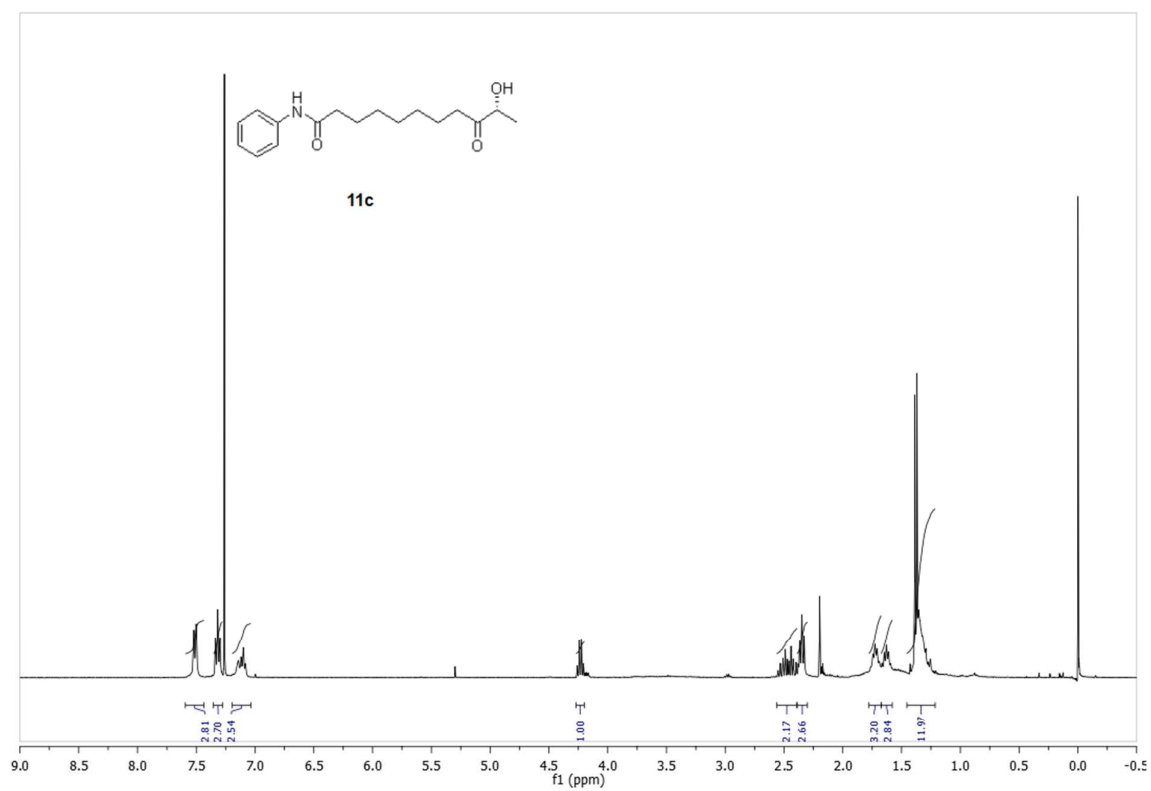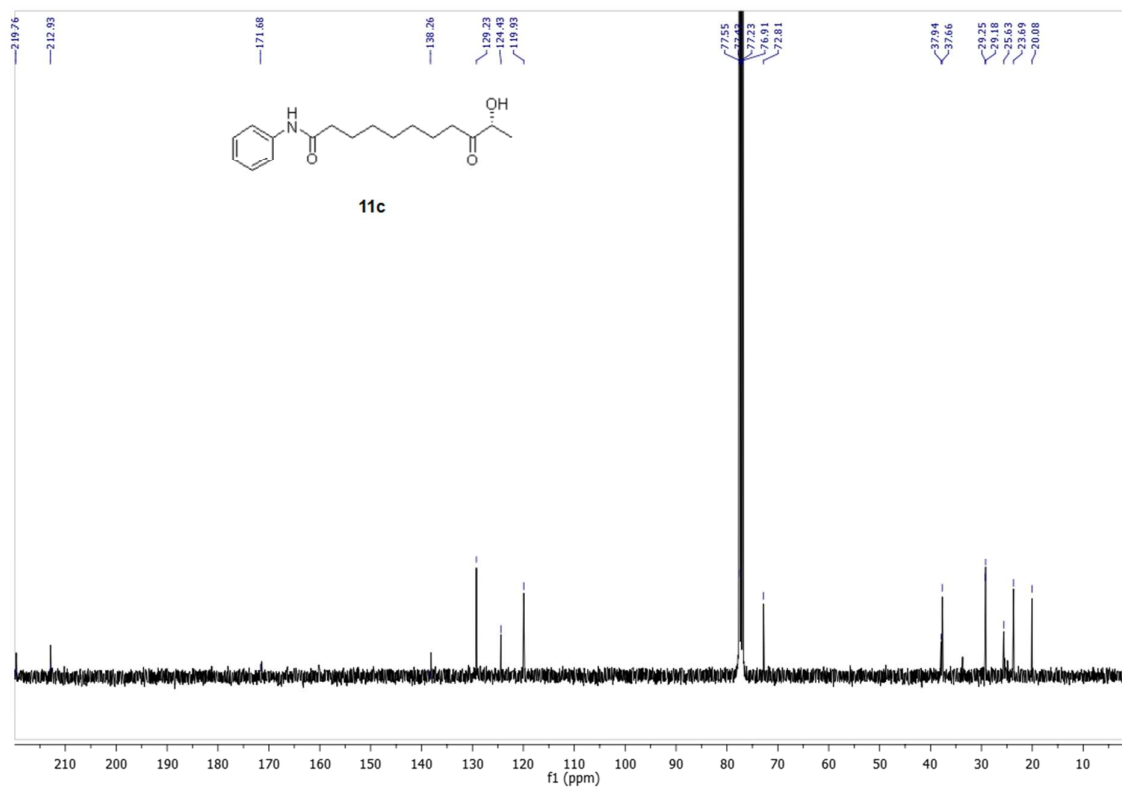

Figure S21:  $^1\text{H}$  and  $^{13}\text{C}$  NMR of product **11c**

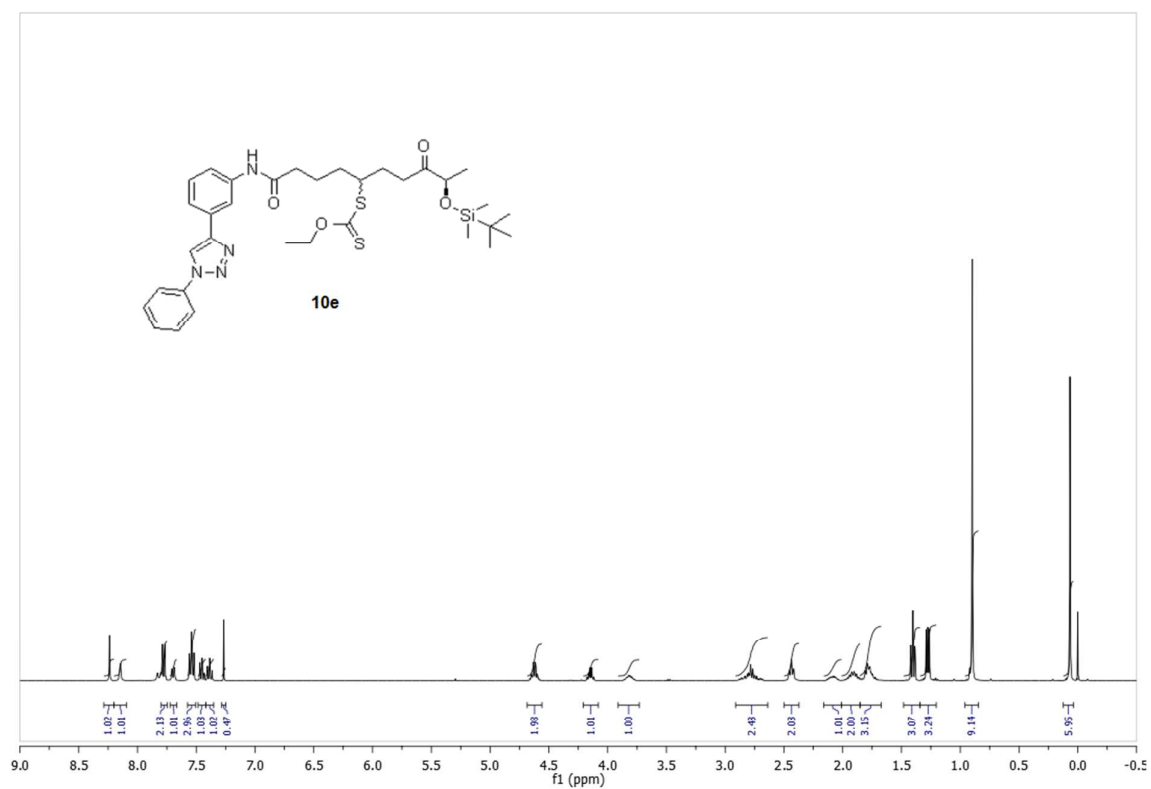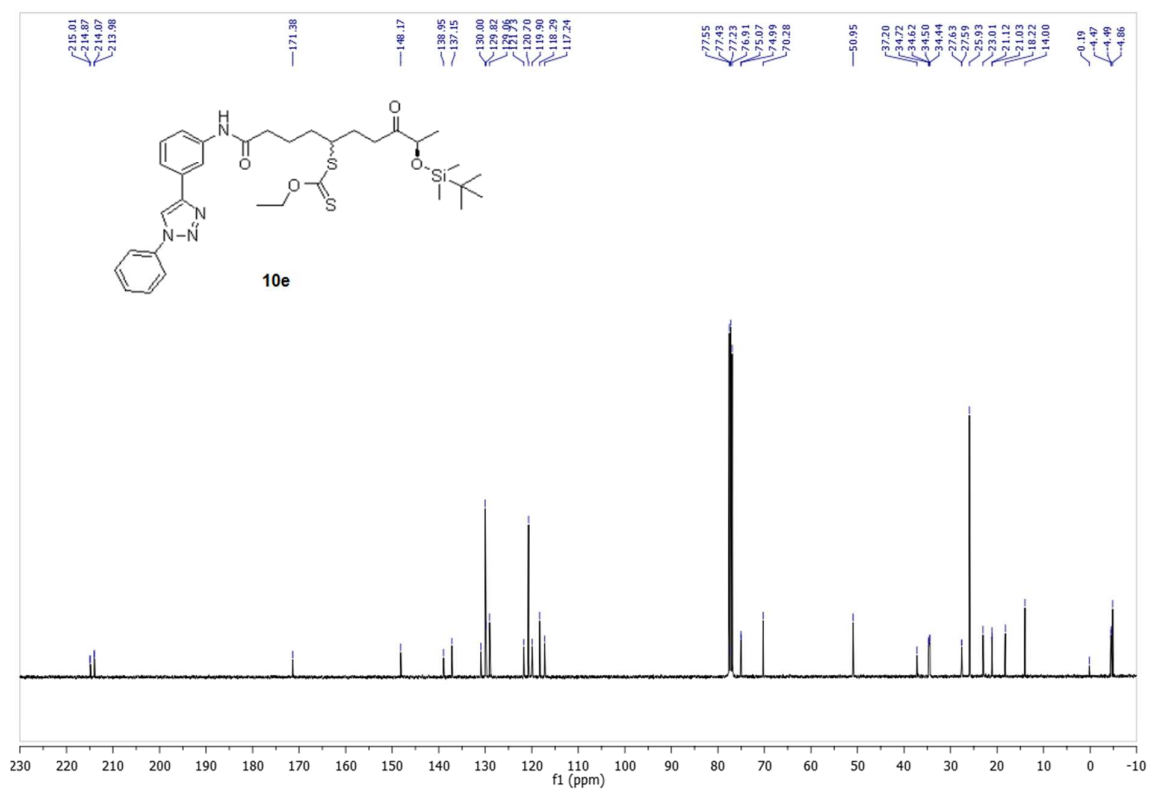

**Figure S22:** <sup>1</sup>H and <sup>13</sup>C NMR of product **10e**

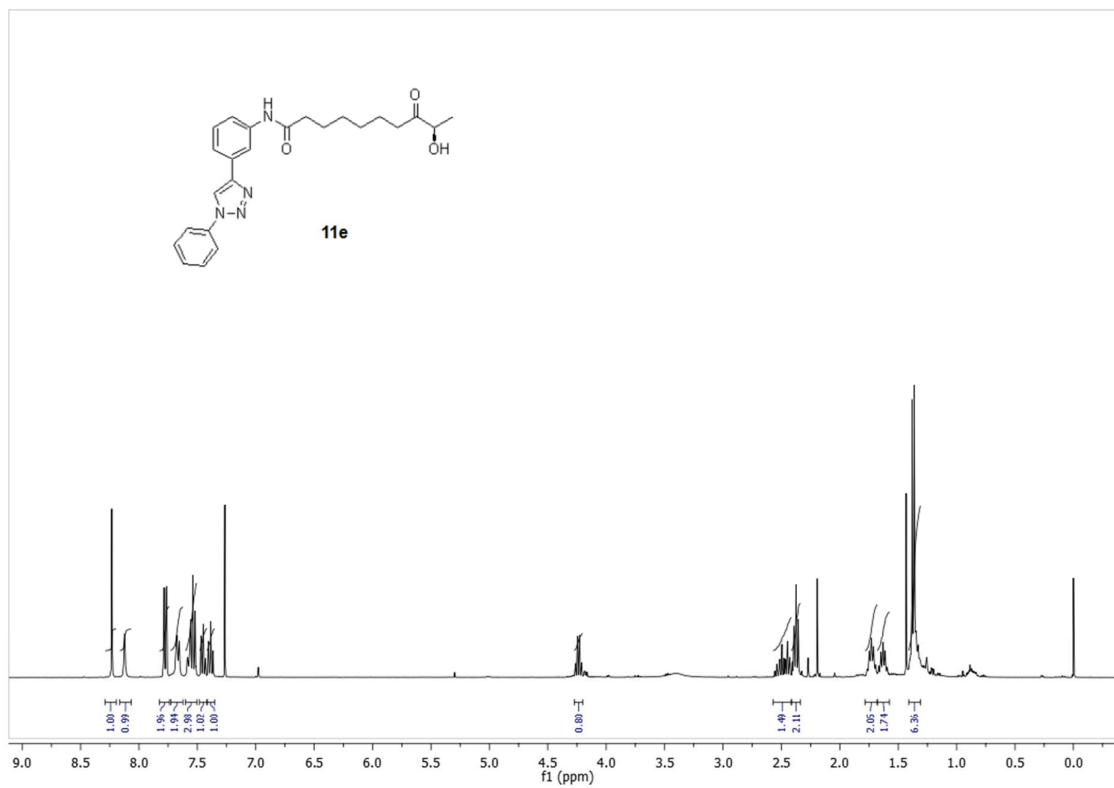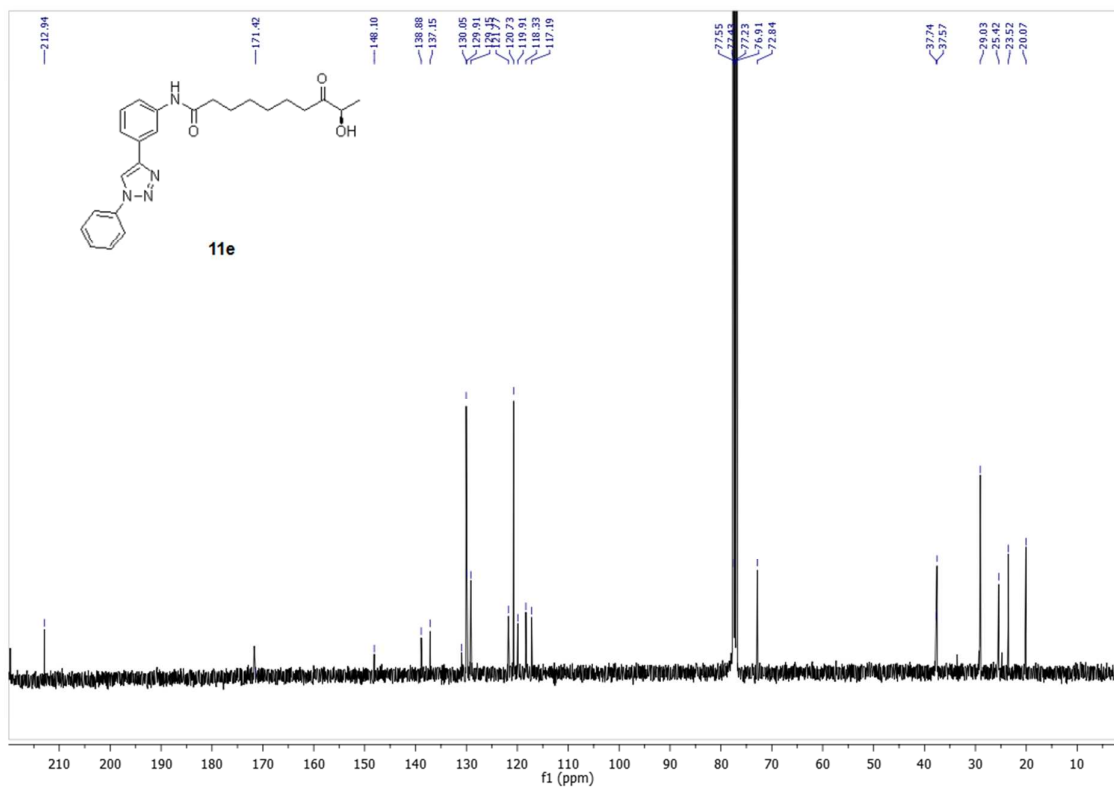

Figure S23:  $^1\text{H}$  and  $^{13}\text{C}$  NMR of product **11e**

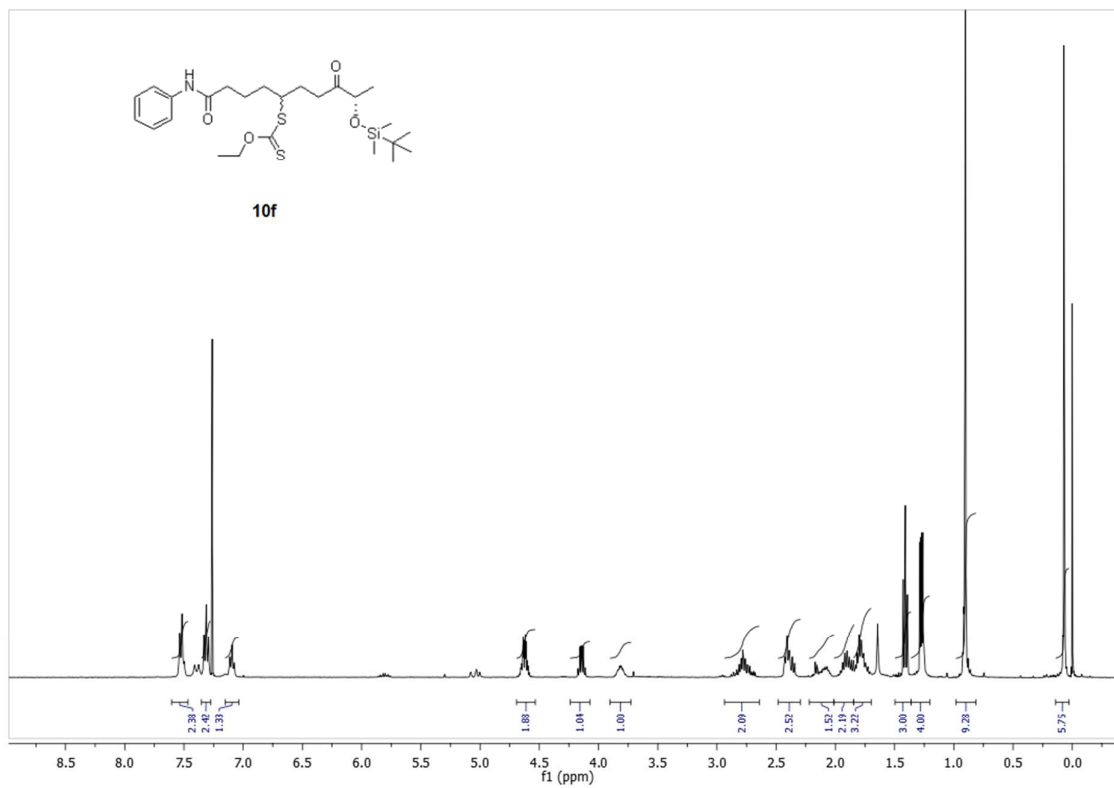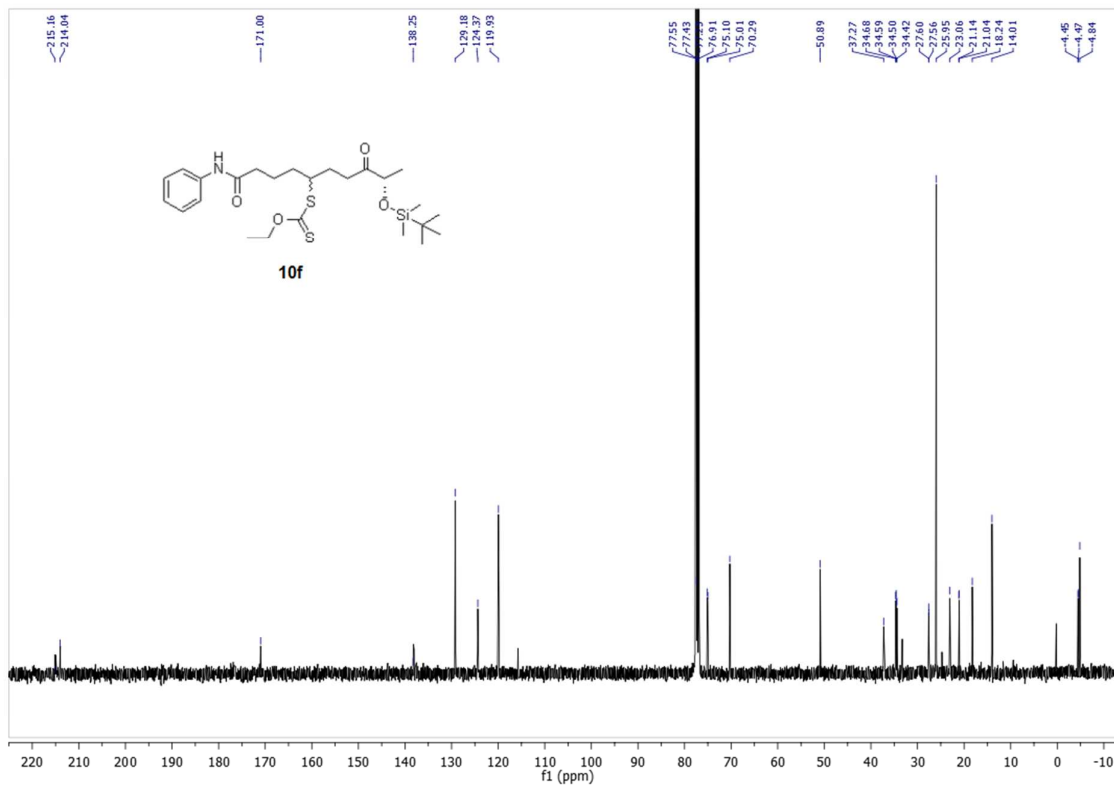

Figure S24:  $^1\text{H}$  and  $^{13}\text{C}$  NMR of product **10f**

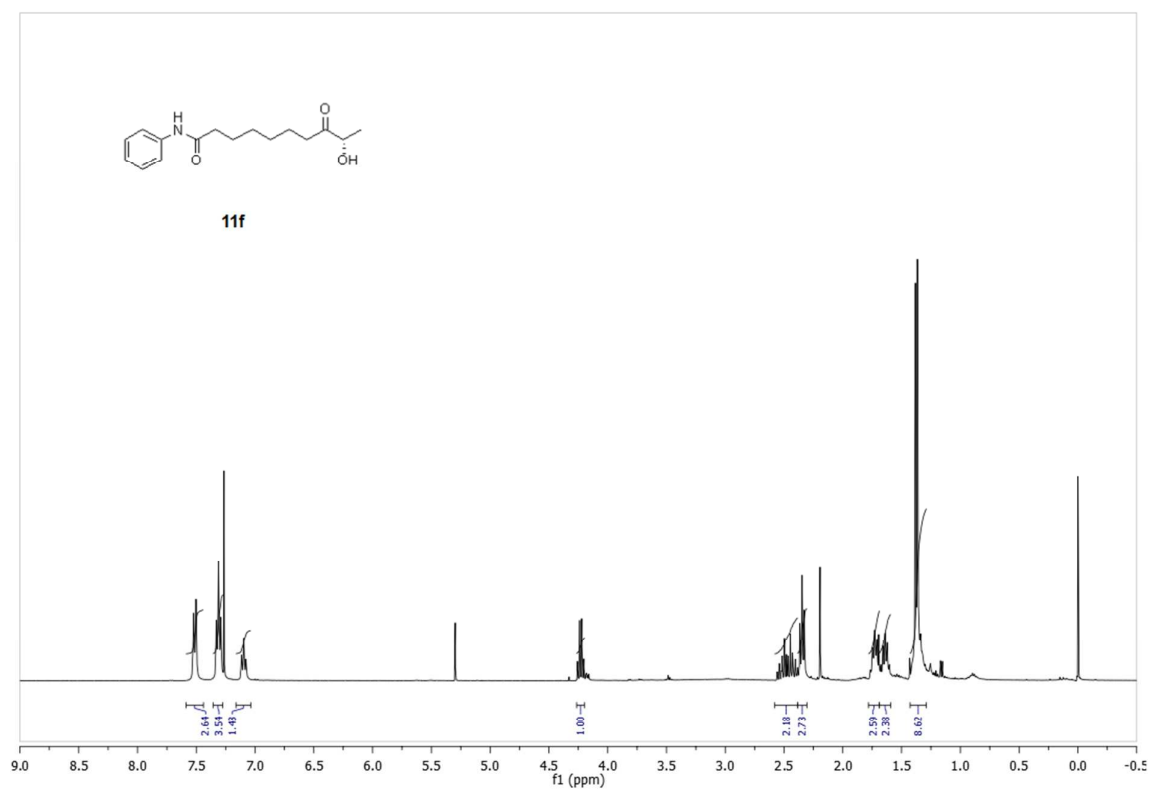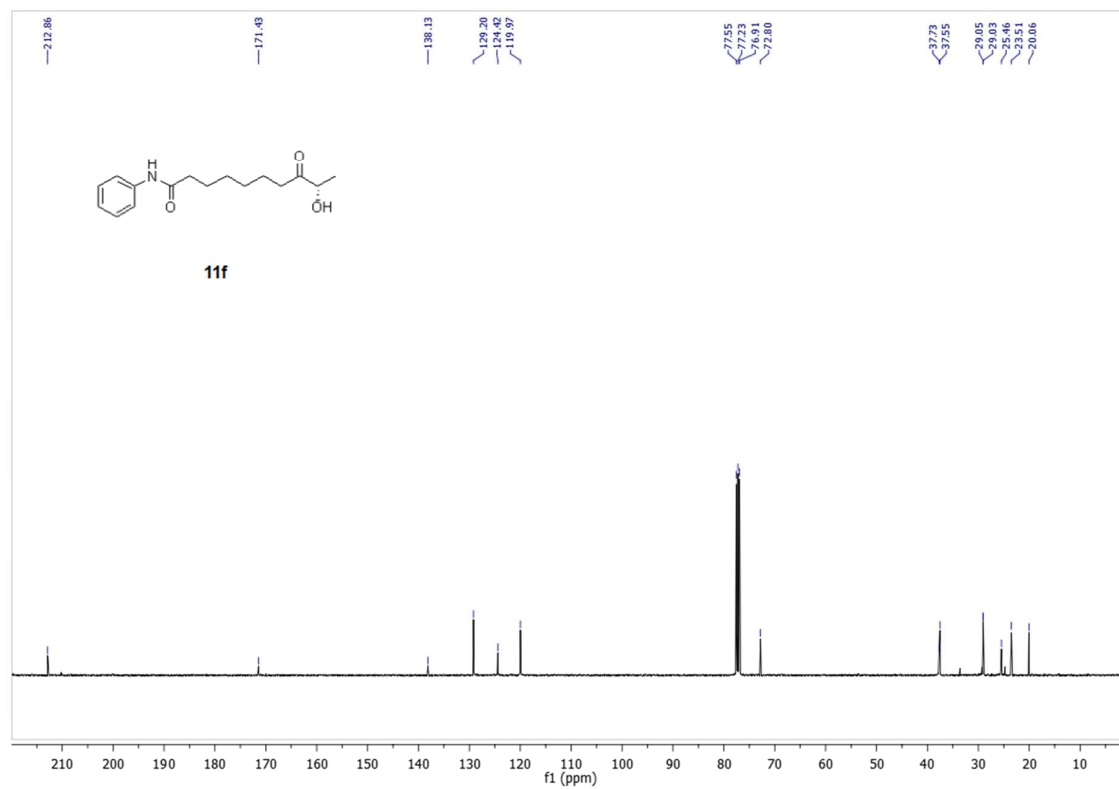

**Figure S25:**  $^1\text{H}$  and  $^{13}\text{C}$  NMR of product **11f**

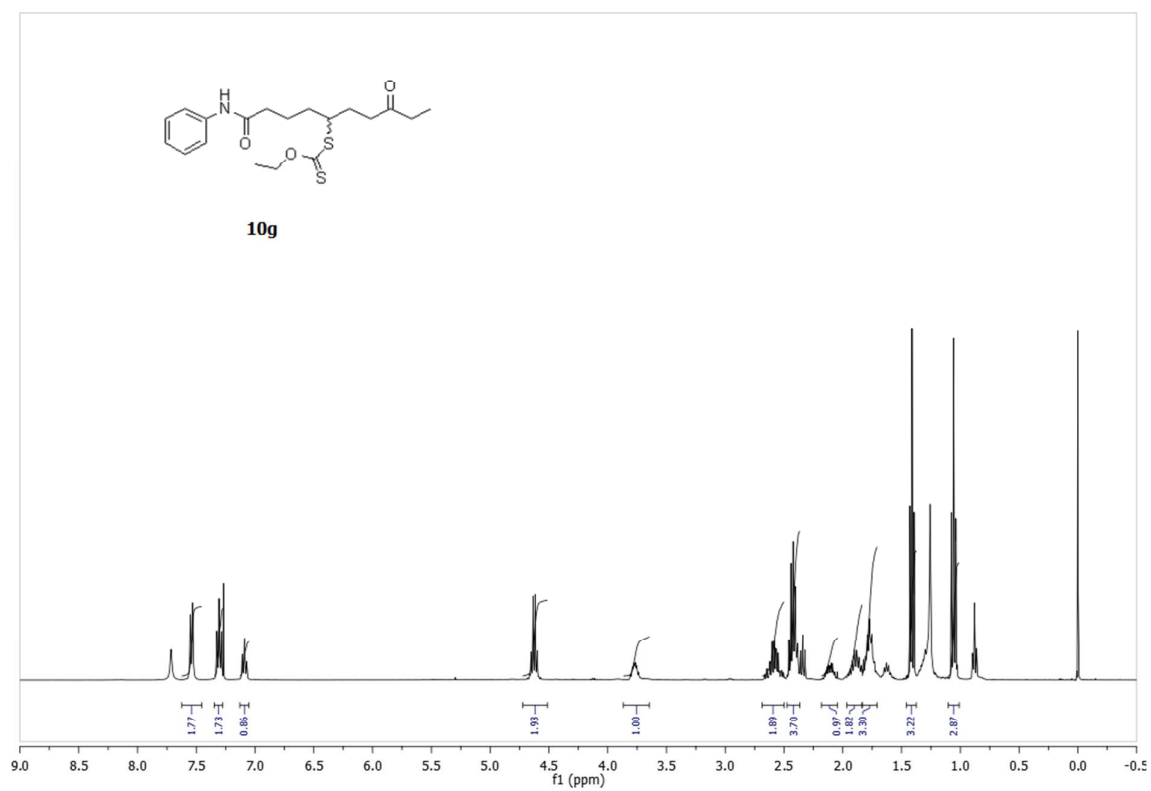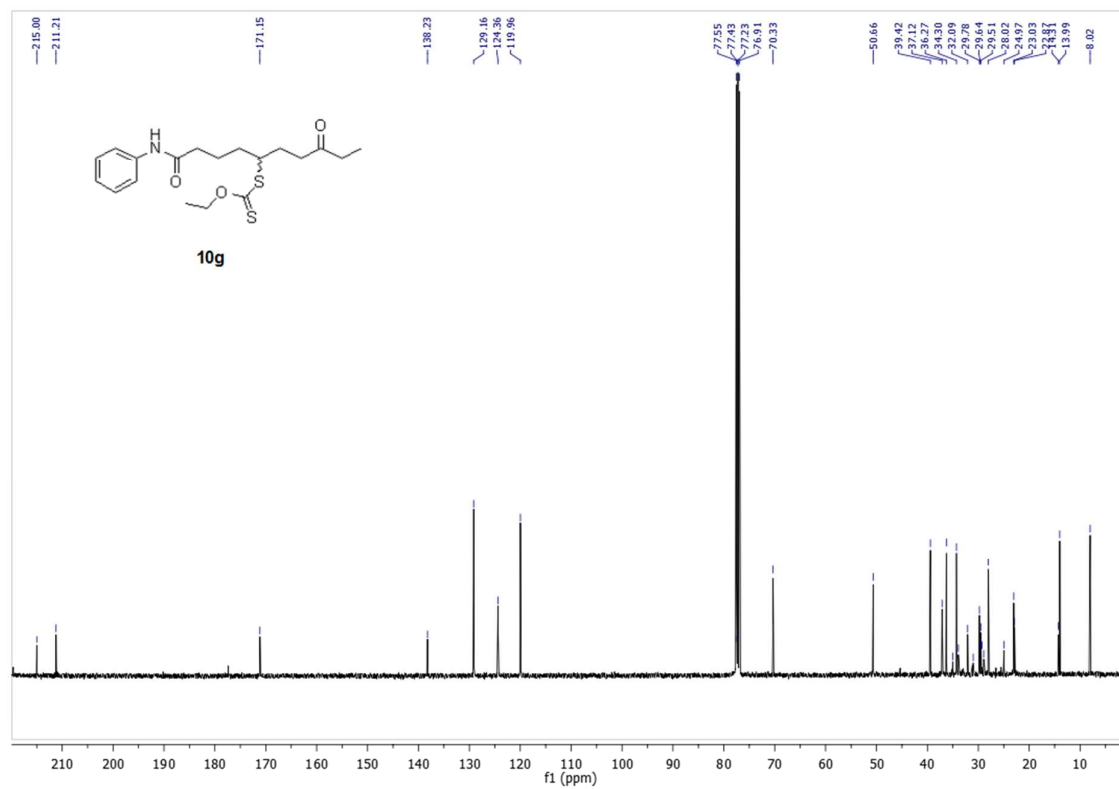

Figure S26:  $^1\text{H}$  and  $^{13}\text{C}$  NMR of product **10g**

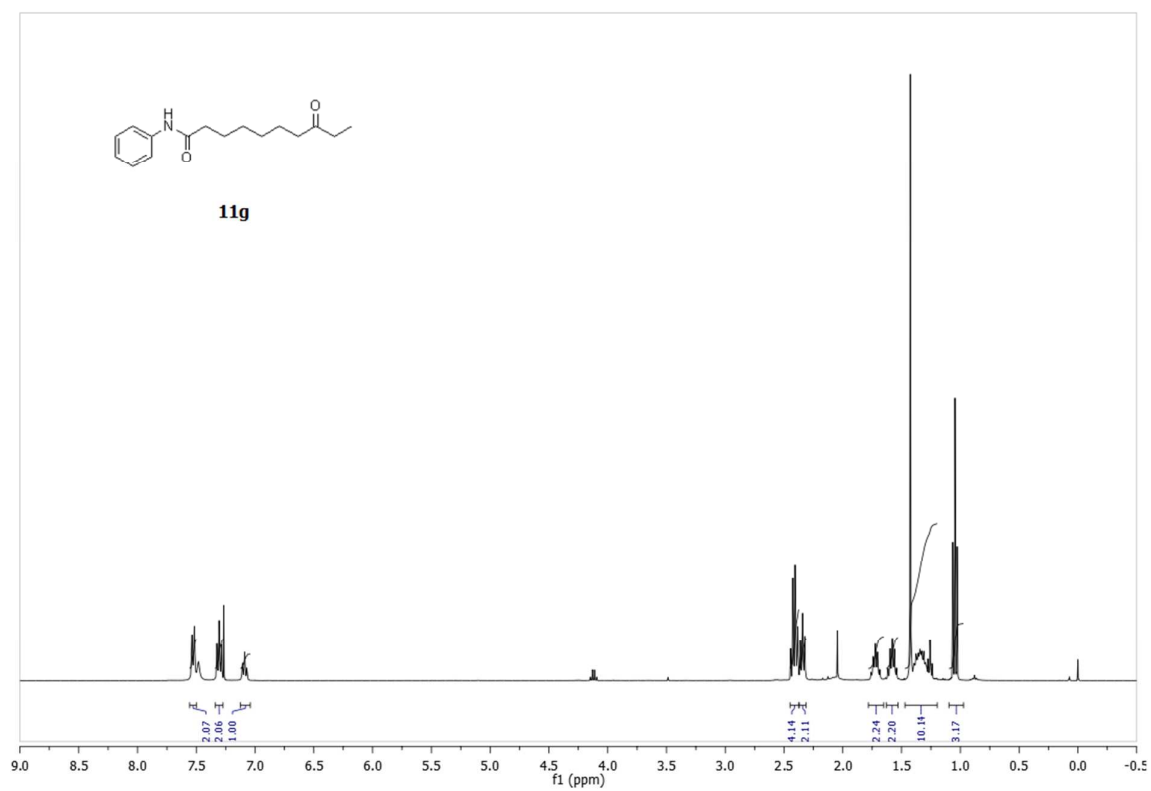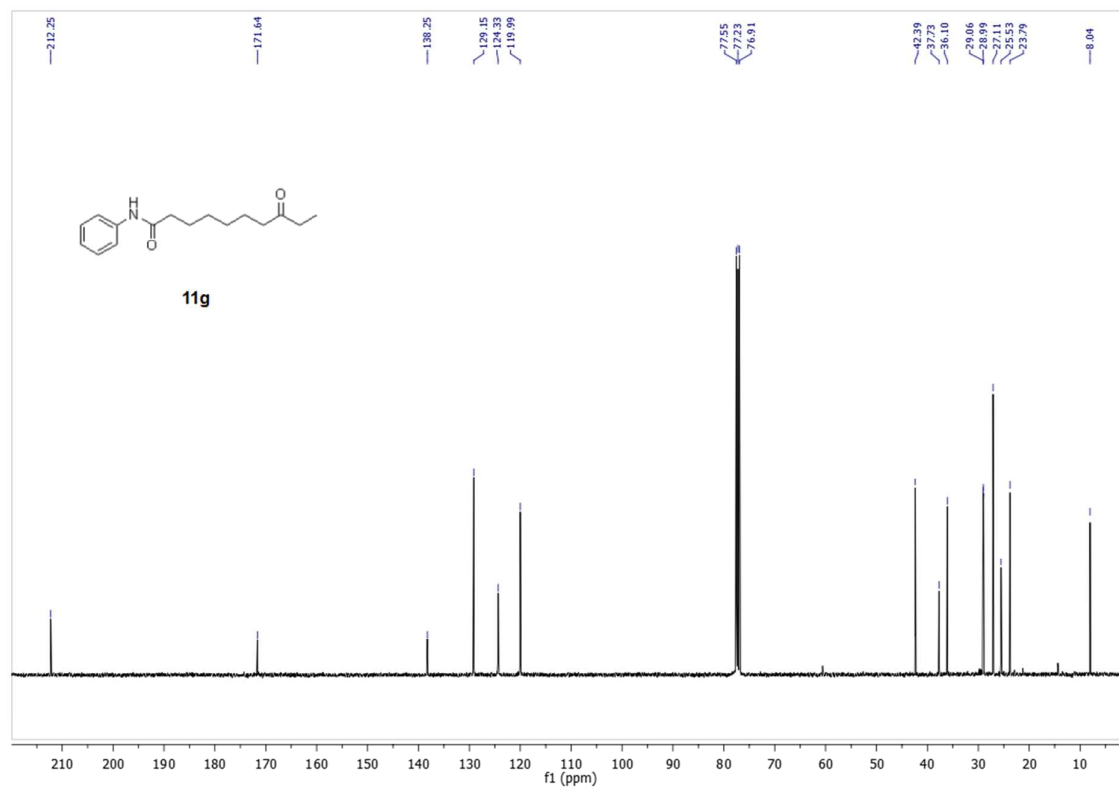

Figure S27:  $^1\text{H}$  and  $^{13}\text{C}$  NMR of product **11g**

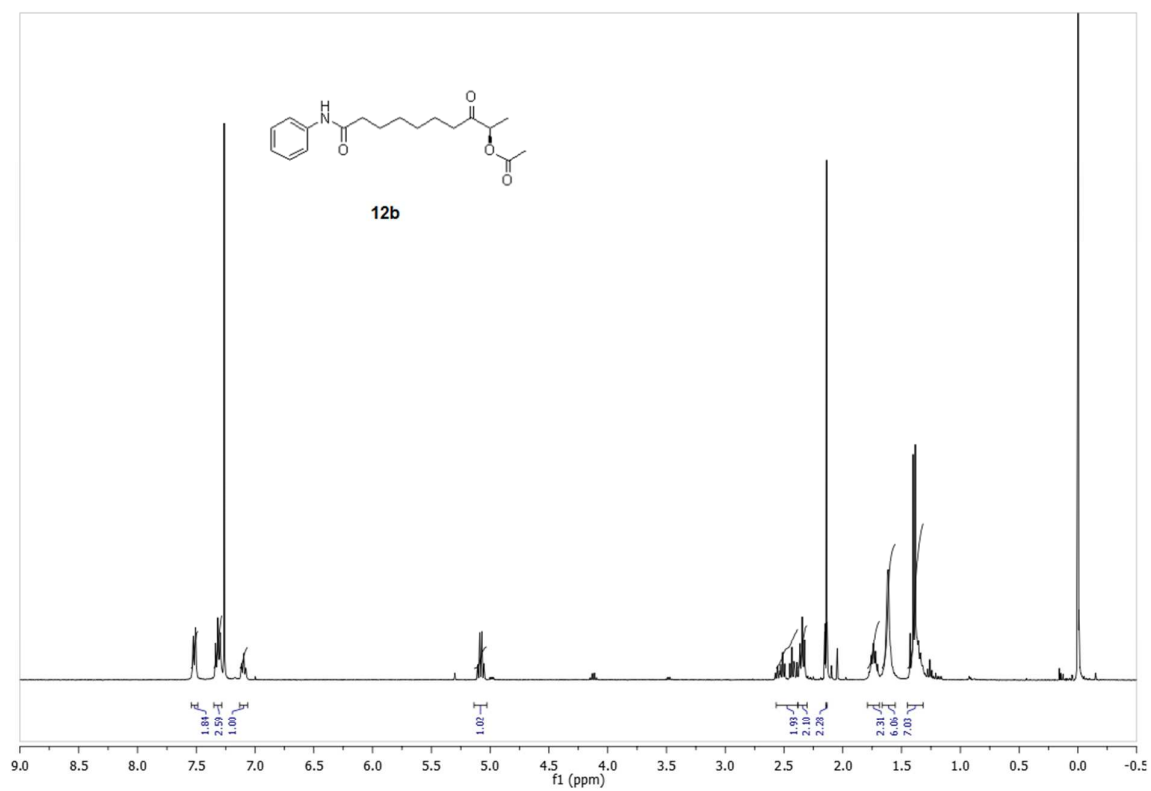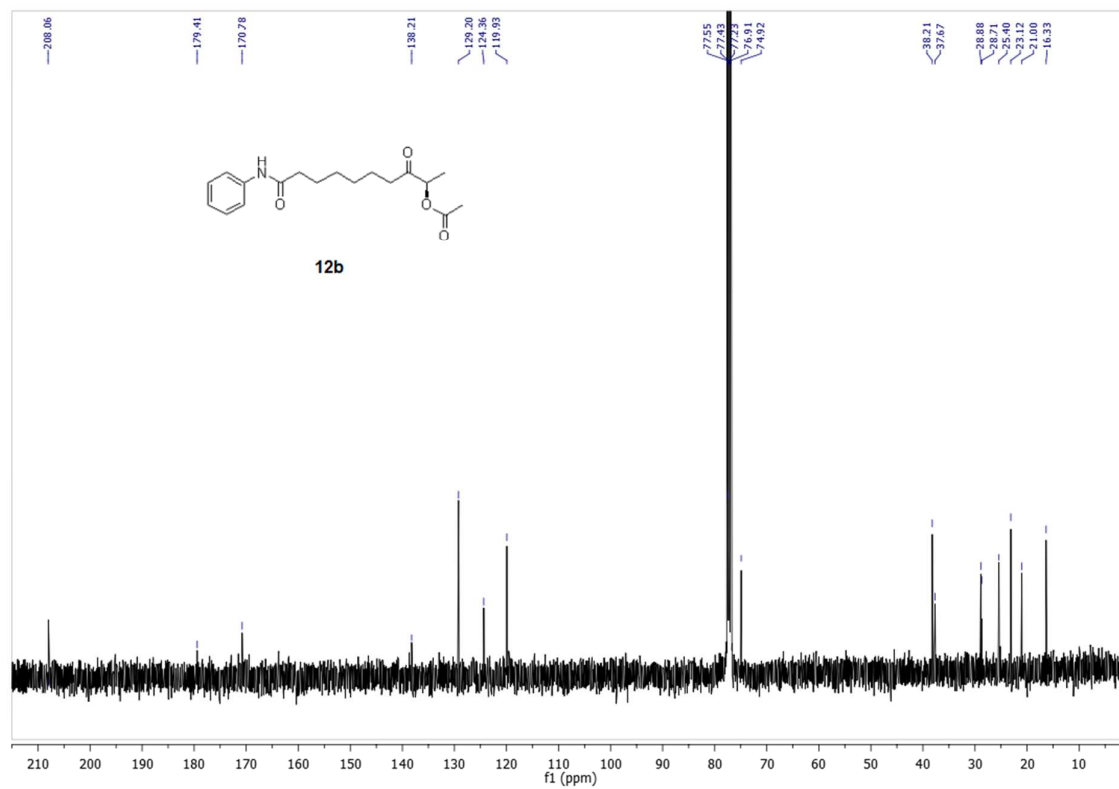

Figure S28:  $^1\text{H}$  and  $^{13}\text{C}$  NMR of product 12b
